# Supplementary material for: A Guide to Curating New World Melastomataceae Collections with a Linear Generic Sequence to World-Wide Melastomataceae
Source: Preprints.org preprint supplement (doi:10.20944/preprints202010.0203.v2), 2020-10-19
Supplement: Supplementary file 3 [file supplementary]

## Sheet: Linear Sequence 1
Tribe/Clade	Linear Sequence	Genus	Authority	Distribution	# spp
Olisbeoideae	1.10	Lijndenia	Zoll. & Moritzi	Old World	16	10
Olisbeoideae	1.20	Memecylon	L.	Old World	379	20
Olisbeoideae	1.30	Spathandra	Guill. & Perr.	Old World	2	30
Olisbeoideae	1.40	Warneckea	Gilg	Old World	49	40
Olisbeoideae	1.50	Mouriri	Aubl.	New World	89	50
Olisbeoideae	1.60	Votomita	Aubl.	New World	10	60
Kibessieae	2.10	Pternandra	Jack	Old World	18	10
Astronieae	3.10	Tessmannianthus	Markgr.	New World	7	10
Astronieae	3.20	Astrocalyx	Merr.	Old World	1	20
Astronieae	3.30	Astronia	Blume	Old World	60	30
Astronieae	3.40	Astronidium	A.Gray	Old World	70	40
Astronieae	3.50	Beccarianthus	Cogn.	Old World	10	50
Lithobieae	4.10	Lithobium	Bong.	New World	1	10
Henrietteeae	5.10	Bellucia	Neck. ex Raf.	New World	22	10
Henrietteeae	5.20	Henriettea	DC.	New World	71	20
Henrietteeae	5.30	Kirkbridea	Wurdack	New World	2	30
Blakeeae	6.10	Chalybea	Naudin	New World	11	10
Blakeeae	6.20	Blakea	Browne	New World	190	20
Merianieae	7.10	Macrocentrum	Hook.f.	New World	25	10
Merianieae	7.20	Maguireanthus	Wurdack	New World	1	20
Merianieae	7.30	Salpinga	Mart. ex DC.	New World	10	30
Merianieae	7.40	Adelobotrys	DC.	New World	31	40
Merianieae	7.50	Graffenrieda	DC.	New World	68	50
Merianieae	7.60	Meriania	Sw.	New World	121	60
Merianieae	7.70	Axinaea	Ruiz & Pav.	New World	41	70
Merianieae	7.80	Centronia	D.Don	New World	5	80
Eriocnemeae	8.10	Ochthephilus	Wurdack	New World	1	10
Eriocnemeae	8.20	Eriocnema	Naudin	New World	1	20
Eriocnemeae	8.30	Physeterostemon	R.Goldenb. & Amorim	New World	5	30
Miconieae	9.10	Miconia	Ruiz & Pav.	New World	1901	10
Unplaced	10.10	Dinophora	Benth.	Old World	1	10
Unplaced	10.20	Ochthocharis	Blume	Old World	8	20
Bertolonieae	11.10	Bertolonia	Raddi	New World	35	10
Sonerileae	12.10	Boyania	Wurdack	New World	2	10
Sonerileae	12.20	Opisthocentra	Hook.f.	New World	1	20
Sonerileae	12.30	Phainantha	Gleason	New World	5	30
Sonerileae	12.40	Tryssophyton	Wurdack	New World	2	40
Sonerileae	12.50	Neblinanthera	Wurdack	New World	1	50
Sonerileae	12.60	Tateanthus	Gleason	New World	1	60
Sonerileae	12.70	Amphiblemma	Naudin	Old World	15	70
Sonerileae	12.80	Calvoa	J. D. Hooker	Old World	20	80
Sonerileae	12.90	Cincinnobotrys	Gilg	Old World	6	90
Sonerileae	12.100	Dicellandra	J. D. Hooker	Old World	3	100
Sonerileae	12.110	Gravesia	Naudin	Old World	115	110
Sonerileae	12.120	Preussiella	Gilg.	Old World	2	120
Sonerileae	12.130	Medinilla	Gaudichaud-Beupre	Old World	360	130
Sonerileae	12.140	Allomorphia	Blume	Old World	-	140
Sonerileae	12.150	Anerincleistus	P. W. Korthals	Old World	39	150
Sonerileae	12.160	Aschistanthera	C. Hansen	Old World	1	160
Sonerileae	12.170	Barthea	J. D. Hooker	Old World	1	170
Sonerileae	12.180	Blastus	Loureiro	Old World	12	180
Sonerileae	12.190	Boerlagea	Cogn.	Old World	1	190
Sonerileae	12.200	Bredia	Blume	Old World	10	200
Sonerileae	12.210	Brittenia	Cogn.	Old World	1	210
Sonerileae	12.220	Campimia	C. Hansen	Old World	3	220
Sonerileae	12.230	Catanthera	F.V. Muller	Old World	17	230
Sonerileae	12.240	Cyanandrium	Stapf	Old World	5	240
Sonerileae	12.250	Cyphotheca	Diels	old World	1	250
Sonerileae	12.260	Driessenia	P. W. Korthals	Old World	14	260
Sonerileae	12.270	Enaulophyton	Steenis	Old World	2	270
Sonerileae	12.280	Fordiophyton	Bullock	Old World	14	280
Sonerileae	12.290	Heteroblemma	(Blume) Cámara-Leret, Ridd.-Num. & Veldk.	Old World	14	290
Sonerileae	12.300	Kendrickia	J. D. Hooker	Old World	1	300
Sonerileae	12.310	Kerriothyrsus	C. Hansen	Old World	1	310
Sonerileae	12.320	Neodriessenia	Nayar	Old World	6	320
Sonerileae	12.330	Oxyspora	DC.	Old World	50	330
Sonerileae	12.340	Pachycentria	Blume	Old World	8	340
Sonerileae	12.350	Phyllagathis	Blume	Old World	58	350
Sonerileae	12.360	Plagiopetalum	Rehd.	Old World	2	360
Sonerileae	12.370	Plethiandra	J. D. Hooker	Old World	7	370
Sonerileae	12.380	Pogonanthera	Blume	Old World	-	380
Sonerileae	12.400	Poikilogyne	E.G.Baker	Old World	26	400
Sonerileae	12.410	Poilannammia	C. Hansen	Old World	4	410
Sonerileae	12.420	Sarcopyramis	Wallich	Old World	2	420
Sonerileae	12.430	Scorpiothyrsus	Hui-Lin Li	Old World	3	430
Sonerileae	12.440	Sonerila	Roxburgh	Old World	160	440
Sonerileae	12.450	Sporoxeia	W.W.Smith	Old World	7	450
Sonerileae	12.460	Stussenia	C. Hansen	Old World	1	460
Sonerileae	12.470	Styrophyton	Hu	old World	1	470
Sonerileae	12.480	Tashiroea	Matsum.	Old World	9	480
Sonerileae	12.490	Trigidiopalma	Chen	Old World	1	490
Sonerileae	12.500	Tylanthera	C. Hansen	Old World	2	500
Sonerileae	12.510	Vietsenia	C. Hansen	Old World	4	510
Unplaced	13.10	Feliciadamia	Bullock	Old World	1	10
Trioleneae	14.10	Monolena	Triana ex Benth. & Hook.f.	New World	16	10
Trioleneae	14.20	Triolena	Naudin	New World	27	20
Cyphostyleae	15.10	Wurdastom	B.Walln.	New World	9	10
Cyphostyleae	15.20	Allomaieta	Gleason	New World	9	20
Cyphostyleae	15.30	Alloneuron	Pilg.	New World	5	30
Cyphostyleae	15.40	Quipuanthus	Michelang. & C.Ulloa	New World	1	40
Cambessedesieae	16.10	Cambessedesia	DC.	New World	25	10
Cambessedesieae	16.20	Merianthera	Kuhlm.	New World	7	20
Cambessedesieae	16.30	Huberia	DC.	New World	37	30
Cambessedesieae	16.40	Bisglaziovia	Cogn.	New World	1	40
Dissochaeteae	17.30	Dalenia	Korth.	Old World		30
Dissochaeteae	17.60	Dissochaeta	Blume	Old World	54	60
Dissochaeteae	17.40	Diplectria	(Blume) H.G.L.Reichnbach	Old World	11	40
Dissochaeteae	17.50	Macrolenes	Naudin ex Miquel	Old World	17	50
Dissochaeteae	17.20	Creochiton	Blume	Old World	12	20
Dissochaeteae	17.10	Pseudodissochaeta	Nayar	Old World	5	10
Unplaced	18.10	Rupestrea	R.Goldenb., Almeda & Michelang.	New World	2	10
Rhexieae	19.10	Pachyloma	DC.	New World	4	10
Rhexieae	19.20	Arthrostemma	Pav. ex D. Don	New World	4	20
Rhexieae	19.30	Rhexia	L.	New World	13	30
Microliceae	20.10	Rhynchanthera	DC.	New World	20	10
Microliceae	20.20	Poteranthera	Bong.	New World	5	20
Microliceae	20.30	Microlicia	D. Don	New World	175	30
Microliceae	20.40	Lavoisiera	DC.	New World	41	40
Microliceae	20.50	Chaetostoma	DC.	New World	12	50
Microliceae	20.60	Trembleya	DC.	New World	16	60
Microliceae	20.70	Stenodon	Naudin	New World	2	70
Marcetieae	21.10	Comoliopsis	Wurdack	New World	3	10
Marcetieae	21.20	Pseudoernestia	Krasser	New World	2	20
Marcetieae	21.30	Dicrananthera	C.Presl	New World	1	30
Marcetieae	21.40	Comolia	DC.	New World	12	40
Marcetieae	21.50	Mallophyton	Wurdack	New World	1	50
Marcetieae	21.60	Acanthella	Hook.f.	New World	2	60
Marcetieae	21.70	Rostranthera	M.J.Rocha & P.J.F.Guim.	New World	1	70
Marcetieae	21.80	Noteropila	Mart.	New World	6	80
Marcetieae	21.90	Acisanthera	P.Browne	New World	8	90
Marcetieae	21.100	Sandemania	Gleason	New World	1	100
Marcetieae	21.110	Leiostegia	Benth.	New World	1	110
Marcetieae	21.120	Siphanthera	Pohl	New World	15	120
Marcetieae	21.130	Macairea	DC.	New World	22	130
Marcetieae	21.140	Ernestia	DC.	New World	14	140
Marcetieae	21.150	Appendicularia	DC.	New World	3	150
Marcetieae	21.160	Brasilianthus	Almeda & Michelang.	New World	1	160
Marcetieae	21.170	Nepsera	Naudin	New World	1	170
Marcetieae	21.180	Fritzschia	Cham.	New World	12	180
Marcetieae	21.190	Aciotis	D. Don	New World	13	190
Marcetieae	21.200	Marcetia	DC.	New World	30	200
Melastomateae	22.10	Loricalepis	Brade	New World	2	10
Melastomateae	22.20	Pterolepis	(DC.) Miq.	New World	16	20
Melastomateae	22.30	Pterogastra	Naudin	New World	3	30
Melastomateae	22.40	Desmoscelis	Naudin	New World	2	40
Melastomateae	22.50	Centradenia	G. Don	New World	4	50
Melastomateae	22.60	Pilocosta	Almeda & Whiffin	New World	5	60
Melastomateae	22.70	Heterocentron	Hook. & Arn.	New World	14	70
Melastomateae	22.80	Schwackaea	Cogn.	New World	1	80
Melastomateae	22.90	Bucquetia	DC.	New World	3	90
Melastomateae	22.100	Castratella	Naudin	New World	2	100
Melastomateae	22.110	Chaetolepis	(DC.) Miq.	New World	10	110
Melastomateae	22.120	Monochaetum	(DC.) Naudin	New World	53	120
Melastomateae	22.130	Andesanthus	P.J.F.Guim. & Michelang.	New World	9	130
Melastomateae	22.140	Tibouchina	Aubl.	New World	39	140
Melastomateae	22.150	Pleroma	D. Don	New World	161	150
Melastomateae	22.160	Chaetogastra	D. Don	New World	117	160
Melastomateae	22.170	Brachyotum	(DC.) Triana	New World	55	170
Melastomateae	22.180	Guyonia	Naudin	Old World	14	180
Melastomateae	22.190	Anaheterotis	Ver.-Lib. & G.Kadereit	Old World	1	190
Melastomateae	22.200	Argyrella	Naudin	Old World	7	200
Melastomateae	22.210	Tristemma	Juss	Old World	16	210
Melastomateae	22.220	Melastomastrum	Naudin	Old World	6	220
Melastomateae	22.230	Cailliella	Jacq-Fél.	Old World	1	230
Melastomateae	22.240	Dichaetanthera	Endl.	Old World	36	240
Melastomateae	22.250	Dissotidendron	(A.Fern. & R.Fern.) Veranso-Libalah & G.Kadereit	Old World	11	250
Melastomateae	22.260	Heterotis	Benth.	Old World	6	260
Melastomateae	22.270	Dupineta	(Sm.) Raf.	Old World	5	270
Melastomateae	22.280	Nothodissotis	Veranso-Libalah & G.Kadereit	Old World	2	280
Melastomateae	22.290	Pseudosbeckia	A.Fern. & R.Fern.	Old World	1	290
Melastomateae	22.300	Rosettea	Ver.-Lib. & G.Kadereit	Old World	21	300
Melastomateae	22.310	Derosiphia	Raf.	Old World	1	310
Melastomateae	22.320	Dissotis	Benth.	Old World	6	320
Melastomateae	22.330	Nerophila	Naudin	Old World	8	330
Melastomateae	22.340	Antherotoma	(Naudin) J. D. Hooker	Old World	10	340
Melastomateae	22.350	Almedanthus	Ver.-Lib. & R.D.Stone	Old World	1	350
Melastomateae	22.360	Eleotis	Ver.-Lib. & R.D.Stone	Old World	4	360
Melastomateae	22.370	Pyrotis	Ver.-Lib. & R.D.Stone	Old World	1	370
Melastomateae	22.380	Feliciotis	Ver.-Lib. & G.Kadereit	Old World	12	380
Melastomateae	22.390	Dionychastrum	A.Fern. & R.Fern.	Old World	1	390
Melastomateae	22.400	Amphorocalyx	J. G. Baker	Old World	5	400
Melastomateae	22.410	Dionycha	Naudin	Old World	3	410
Melastomateae	22.420	Rousseauxia	DC.	Old World	13	420
Melastomateae	22.430	Melastoma	L.	Old World	75	430
Melastomateae	22.440	Osbeckia	L.	Old World	30	440
Melastomateae	22.450	Otanthera	Blume	Old World	3	450
Unplaced	23.10	Centradeniastrum	Cogn.	New World	2	10
Unplaced	23.20	Stanmarkia	Almeda	New World	2	20

## Sheet: Neotropical New Genera 2
Genus	Status	Tribe	Species former placement
Andesanthus	New	Melastomatoideae	Tibouchina
Brasilianthus	New	Marcetieae	NEW
Chaetogastra	Resurrected	Melastomatoideae	Tibouchina
Dicrananthera	Resurrected	Marcetieae	Acisanthera
Leiostegia	Resurrected	Marcetieae	Comolia
Noterophila	Resurrected	Marcetieae	Acisanthera
Physeterostemon	New	Eriocnemeae	NEW
Pleroma	Resurrected	Melastomatoideae	Tibouchina
Pseudoernestia	Resurrected	Marcetieae	Ernestia
Quipuanthus	New	Cyphostyleae	NEW
Rostranthera	New	Marcetieae	Acisanthera
Rupestrea	New	unplaced	Miconia

## Sheet: Neotropical generic synonyms 3
Tribe	Genus	Currently Accepted as
Blakeeae	Huilaea	Chalybea
Blakeeae	Topobea	Blakea
Cambessedessiae	Behuria	Huberia
Cambessedessiae	Benevidesia	Huberia
Cambessedessiae	Dolichoura	Huberia
Henrietteeae	Henriettella	Henriettea
Henrietteeae	Llewellynia	Henriettea
Henrietteeae	Loreya	Bellucia
Henrietteeae	Myriaspora	Bellucia
Melastomateae	Itatiaia	Pleroma
Melastomateae	Microlepis	Pleroma
Melastomateae	Schizocentron	Heterocentron
Melastomateae	Svitramia	Pleroma
Melastomateae	Tibouchinopsis	Pleroma
Miconieae	Anaectocalyx	Miconia
Miconieae	Calycogonium	Miconia
Miconieae	Catocoryne	Miconia
Miconieae	Charianthus	Miconia
Miconieae	Clidemia	Miconia
Miconieae	Conostegia	Miconia
Miconieae	Heterotrichum	Miconia
Miconieae	Icaria	Miconia
Miconieae	Killipia	Miconia
Miconieae	Leandra	Miconia
Miconieae	Mecranium	Miconia
Miconieae	Necranium	Miconia
Miconieae	Ossaea	Miconia
Miconieae	Pachyanthus	Miconia
Miconieae	Pentossaea	Miconia
Miconieae	Platycentrum	Miconia
Miconieae	Pleiochiton	Miconia
Miconieae	Sagraea	Miconia
Miconieae	Tetrazygia	Miconia
Miconieae	Tococa	Miconia
Triolenae	Diolena	Triolena
Triolenae	Diplarpea	Triolena

## Sheet: Neotropical synonyms 4
Formely accepted name	Formerly accepted authors	Currently accepted name	Currently acceppted authors	Formely accepted name	Currently accepted name
Acisanthera bivalvis	(Aubl.) Cogn.	Noterophila bivalvis	(Aubl.) Kriebel & M.J.R.Rocha	Acisanthera bivalvis (Aubl.) Cogn.	Noterophila bivalvis (Aubl.) Kriebel & M.J.R.Rocha
Acisanthera crassipes	(Naudin) Wurdack	Noterophila crassipes	(Naudin) Kriebel & M.J.R.Rocha	Acisanthera crassipes (Naudin) Wurdack	Noterophila crassipes (Naudin) Kriebel & M.J.R.Rocha
Acisanthera genliseoides	(Hoehne) Wurdack	Noterophila genliseoides	(Hoehne) Kriebel & M.J.R.Rocha	Acisanthera genliseoides (Hoehne) Wurdack	Noterophila genliseoides (Hoehne) Kriebel & M.J.R.Rocha
Acisanthera hedyotoidea	(C.Presl.) Triana	Dicrananthera hedyotoidea	C.Presl.	Acisanthera hedyotoidea (C.Presl.) Triana	Dicrananthera hedyotoidea C.Presl.
Acisanthera limnobios	(DC.) Triana	Noterophila limnobios	(DC.) Mart.	Acisanthera limnobios (DC.) Triana	Noterophila limnobios (DC.) Mart.
Acisanthera nana	Ule	Noterophila nana	(Ule) Kriebel & M.J.R.Rocha	Acisanthera nana Ule	Noterophila nana (Ule) Kriebel & M.J.R.Rocha
Acisanthera quadrata	Pers.	Acisanthera erecta	J.St.-Hil	Acisanthera quadrata Pers.	Acisanthera erecta J.St.-Hil
Acisanthera rosulans	Huber	Noterophila rosulans	(Huber) Kriebel & M.J.R.Rocha	Acisanthera rosulans Huber	Noterophila rosulans (Huber) Kriebel & M.J.R.Rocha
Acisanthera tetraptera	(Cogn.) Gleason	Rostranthera tetraptera	(Cogn.) M.J.R.Rocha & P.J.F.Guim.	Acisanthera tetraptera (Cogn.) Gleason	Rostranthera tetraptera (Cogn.) M.J.R.Rocha & P.J.F.Guim.
Adelobotrys antioquiensis	Wurdack	Meriania hoyosii	(Wurdack) Almeda & Penneys	Adelobotrys antioquiensis Wurdack	Meriania hoyosii (Wurdack) Almeda & Penneys
Anaectocalyx bracteosa	(Naudin) Triana ex Cogn.	Miconia bracteosa	(Naudin) Michelang.	Anaectocalyx bracteosa (Naudin) Triana ex Cogn.	Miconia bracteosa (Naudin) Michelang.
Anaectocalyx latifolia	Cogn.	Miconia anaectocalyx	Michelang.	Anaectocalyx latifolia Cogn.	Miconia anaectocalyx Michelang.
Anaectocalyx manarae	Wurdack	Miconia manarae	(Wurdack) Michelang.	Anaectocalyx manarae Wurdack	Miconia manarae (Wurdack) Michelang.
Appendicularia rubra	(Pulle.) M.J.R.Rocha & P.J.F.Guim.	Ernestia rubra	Pulle	Appendicularia rubra (Pulle.) M.J.R.Rocha & P.J.F.Guim.	Ernestia rubra Pulle
Behuria capixaba	R.Goldenb. & Reginato	Huberia capixaba	(R.Goldenb. & Reginato) Bochorny & Michelang.	Behuria capixaba R.Goldenb. & Reginato	Huberia capixaba (R.Goldenb. & Reginato) Bochorny & Michelang.
Behuria comosa	R. Tavares, Baumgratz & R.Goldenb.	Huberia capixaba	(R.Goldenb. & Reginato) Bochorny & Michelang.	Behuria comosa R. Tavares, Baumgratz & R.Goldenb.	Huberia capixaba (R.Goldenb. & Reginato) Bochorny & Michelang.
Behuria cordifolia	Cogn.	Huberia cordifolia	(Cogn.) Bochorny & R.Goldenb.	Behuria cordifolia Cogn.	Huberia cordifolia (Cogn.) Bochorny & R.Goldenb.
Behuria corymbosa	Cogn.	Huberia corymbosa	(Cogn.) Bochorny & R.Goldenb.	Behuria corymbosa Cogn.	Huberia corymbosa (Cogn.) Bochorny & R.Goldenb.
Behuria edmundoi	Brade	Huberia edmundoi	(Brade) Bochorny & R.Goldenb.	Behuria edmundoi Brade	Huberia edmundoi (Brade) Bochorny & R.Goldenb.
Behuria glaziouviana	Cogn.	Huberia hirsuta	Bochorny & R.Goldenb.	Behuria glaziouviana Cogn.	Huberia hirsuta Bochorny & R.Goldenb.
Behuria glutinosa	Cogn.	Huberia glutinosa	(Cogn.) Bochorny & R.Goldenb.	Behuria glutinosa Cogn.	Huberia glutinosa (Cogn.) Bochorny & R.Goldenb.
Behuria huberioides	Brade	Huberia huberioides	(Brade) Bochorny & R.Goldenb.	Behuria huberioides Brade	Huberia huberioides (Brade) Bochorny & R.Goldenb.
Behuria insignis	Cham.	Huberia insignis	(Cham.) Bochorny & R.Goldenb.	Behuria insignis Cham.	Huberia insignis (Cham.) Bochorny & R.Goldenb.
Behuria limae	Brade	Huberia limae	(Brade) Bochorny & R.Goldenb.	Behuria limae Brade	Huberia limae (Brade) Bochorny & R.Goldenb.
Behuria lumiarensis	Bochorny, Michelang. & R.Goldenb.	Huberia lumiarensis	(Bochorny, Michelang. & R.Goldenb.) Bochorny	Behuria lumiarensis Bochorny, Michelang. & R.Goldenb.	Huberia lumiarensis (Bochorny, Michelang. & R.Goldenb.) Bochorny
Behuria magdalenensis	(Brade) R. Tavares & Baumgratz	Huberia magdalenensis	(Brade) Bochorny & R.Goldenb.	Behuria magdalenensis (Brade) R. Tavares & Baumgratz	Huberia magdalenensis (Brade) Bochorny & R.Goldenb.
Behuria mestrealvarensis	D.T. Iglesias & R.Goldenb.	Huberia mestrealvarensis	(D.T.Iglesias & R.Goldenb.) Bochorny & Michelang.	Behuria mestrealvarensis D.T. Iglesias & R.Goldenb.	Huberia mestrealvarensis (D.T.Iglesias & R.Goldenb.) Bochorny & Michelang.
Behuria mouraei	Cogn.	Huberia mourae	(Cogn.) Bochorny & R.Goldenb.	Behuria mouraei Cogn.	Huberia mourae (Cogn.) Bochorny & R.Goldenb.
Behuria organensis	(Saldanha & Cogn.) R. Tavares & Baumgratz	Huberia organensis	(Saldanha & Cogn.) Bochorny & R.Goldenb.	Behuria organensis (Saldanha & Cogn.) R. Tavares & Baumgratz	Huberia organensis (Saldanha & Cogn.) Bochorny & R.Goldenb.
Behuria parvifolia	Cogn.	Huberia minutifolia	Bochorny & R.Goldenb.	Behuria parvifolia Cogn.	Huberia minutifolia Bochorny & R.Goldenb.
Behuria souza-limae	Brade	Huberia souzalimae	(Brade) Bochorny & R.Goldenb.	Behuria souza-limae Brade	Huberia souzalimae (Brade) Bochorny & R.Goldenb.
Calycogonium angulatum	Griseb.	Miconia angulata	(Griseb.) M. Gómez	Calycogonium angulatum Griseb.	Miconia angulata (Griseb.) M. Gómez
Calycogonium apiculatum	Urb. & Ekman	Miconia rufistellata	Judd & Majure	Calycogonium apiculatum Urb. & Ekman	Miconia rufistellata Judd & Majure
Calycogonium apleurum	(Urb. & Ekman) Judd & Skean	Miconia apleura	(Urb. & Ekman) Judd & Becquer	Calycogonium apleurum (Urb. & Ekman) Judd & Skean	Miconia apleura (Urb. & Ekman) Judd & Becquer
Calycogonium bairdianum	Skean, Judd, Clase & Peguero	Miconia bairdiana	((Skean, Judd, Clase & Peguero) Skean & Judd	Calycogonium bairdianum Skean, Judd, Clase & Peguero	Miconia bairdiana ((Skean, Judd, Clase & Peguero) Skean & Judd
Calycogonium bissei	Becquer	Miconia bissei	(Becquer) Bécquer & Michelang	Calycogonium bissei Becquer	Miconia bissei (Becquer) Bécquer & Michelang
Calycogonium brevifolium	Urb. & Ekman	Miconia brevifolia	(Urb. & Ekman) Skean & Judd	Calycogonium brevifolium Urb. & Ekman	Miconia brevifolia (Urb. & Ekman) Skean & Judd
Calycogonium calycopteris	(Rich.) Urb	Miconia calycopteris	(Rich.) Judd, Bécquer & Majure	Calycogonium calycopteris (Rich.) Urb	Miconia calycopteris (Rich.) Judd, Bécquer & Majure
Calycogonium clidemioides	Griseb.	Miconia baracoana	M. Gómez	Calycogonium clidemioides Griseb.	Miconia baracoana M. Gómez
Calycogonium cocoense	Alain	Miconia liogeri	Bécquer & Michelang	Calycogonium cocoense Alain	Miconia liogeri Bécquer & Michelang
Calycogonium domatiatum	Urb. & Ekman	Miconia domatiata	(Urb. & Ekman) Skean & Judd	Calycogonium domatiatum Urb. & Ekman	Miconia domatiata (Urb. & Ekman) Skean & Judd
Calycogonium ekmanii	Urb.	Miconia erikmaniana	Skean & Judd	Calycogonium ekmanii Urb.	Miconia erikmaniana Skean & Judd
Calycogonium ellipticum	C.Wright	Miconia ellipitica	(C.Wright) M. Gomez	Calycogonium ellipticum C.Wright	Miconia ellipitica (C.Wright) M. Gomez
Calycogonium floribundum	Borhidi	Miconia cupeyalensis	Bécquer & Michelang	Calycogonium floribundum Borhidi	Miconia cupeyalensis Bécquer & Michelang
Calycogonium formonense	Judd, Skean & Clase	Miconia formonensis	(Judd, Skean & Clase) Judd, Bécquer & Majure	Calycogonium formonense Judd, Skean & Clase	Miconia formonensis (Judd, Skean & Clase) Judd, Bécquer & Majure
Calycogonium glabratum	(Sw.) DC.	Miconia glabrifolia	Skean, Judd, Majure & Bécquer	Calycogonium glabratum (Sw.) DC.	Miconia glabrifolia Skean, Judd, Majure & Bécquer
Calycogonium grisebachii	Triana	Miconia grisebachiana	Bécquer & Michelang	Calycogonium grisebachii Triana	Miconia grisebachiana Bécquer & Michelang
Calycogonium hispidulum	Cogn	Miconia hispidula	(Cogn.) Judd, Bécquer & Majure	Calycogonium hispidulum Cogn	Miconia hispidula (Cogn.) Judd, Bécquer & Majure
Calycogonium impressum	Urb. & Ekman	Miconia impressinervis	Skean & Judd	Calycogonium impressum Urb. & Ekman	Miconia impressinervis Skean & Judd
Calycogonium lanceolatum	Griseb.	Miconia secundo-lanceolata	(Griseb.) M. Gómez	Calycogonium lanceolatum Griseb.	Miconia secundo-lanceolata (Griseb.) M. Gómez
Calycogonium lindenianum	Naudin	Miconia lindeniana	(Naudin) M. Gómez	Calycogonium lindenianum Naudin	Miconia lindeniana (Naudin) M. Gómez
Calycogonium maculatum	Urb. & Ekman	Miconia maculata	(Urb. & Ekman) Judd, Bécquer & Majure	Calycogonium maculatum Urb. & Ekman	Miconia maculata (Urb. & Ekman) Judd, Bécquer & Majure
Calycogonium microphyllum	C.Wright	Miconia microphylla	(C.Wright) M. Gómez	Calycogonium microphyllum C.Wright	Miconia microphylla (C.Wright) M. Gómez
Calycogonium moanum	(Borhidi & O.Muñiz) Borhidi & O.Muñiz	Miconia moana	(Borhidi & O.Muñiz) Bécquer & Michelang	Calycogonium moanum (Borhidi & O.Muñiz) Borhidi & O.Muñiz	Miconia moana (Borhidi & O.Muñiz) Bécquer & Michelang
Calycogonium plicatum	Griseb.	Miconia plicata	(Griseb.) M. Gómez	Calycogonium plicatum Griseb.	Miconia plicata (Griseb.) M. Gómez
Calycogonium pseudofloribundum	Becquer	Miconia pseudofloribunda	(Becquer) Bécquer & Michelang	Calycogonium pseudofloribundum Becquer	Miconia pseudofloribunda (Becquer) Bécquer & Michelang
Calycogonium reticulatum	(Cogn.) Judd & Skean	Miconia reticulato-venosa	Judd, Bécquer & Majure	Calycogonium reticulatum (Cogn.) Judd & Skean	Miconia reticulato-venosa Judd, Bécquer & Majure
Calycogonium revolutum	Alain	Miconia perezii	(Alain) Bécquer & Michelang	Calycogonium revolutum Alain	Miconia perezii (Alain) Bécquer & Michelang
Calycogonium rhamnoideum	Naudin	Miconia vulcanidomatia	Bécquer & Skean	Calycogonium rhamnoideum Naudin	Miconia vulcanidomatia Bécquer & Skean
Calycogonium rhomboideum	Urb. & Ekman	Miconia rhomboidea	((Urb. & Ekman)) Skean & Judd	Calycogonium rhomboideum Urb. & Ekman	Miconia rhomboidea ((Urb. & Ekman)) Skean & Judd
Calycogonium rosmarinifolium	Griseb.	Miconia rosmarinifolia	(Griseb.) M. Gómez	Calycogonium rosmarinifolium Griseb.	Miconia rosmarinifolia (Griseb.) M. Gómez
Calycogonium saxicola	Britton & P. Wilson	Miconia karsticola	Judd, Bécquer, Skean, & Majure	Calycogonium saxicola Britton & P. Wilson	Miconia karsticola Judd, Bécquer, Skean, & Majure
Calycogonium squamulosum	Cogn.	Henriettea squamulosa	(Cogn.) Judd	Calycogonium squamulosum Cogn.	Henriettea squamulosa (Cogn.) Judd
Calycogonium susannae	Borhidi	Miconia susannae	(Borhidi) Bécquer & Michelang	Calycogonium susannae Borhidi	Miconia susannae (Borhidi) Bécquer & Michelang
Calycogonium tetragonolobum	(Cogn.) Judd & Skean	Miconia tetragonoloba	(Cogn.) Judd, Bécquer & Majure	Calycogonium tetragonolobum (Cogn.) Judd & Skean	Miconia tetragonoloba (Cogn.) Judd, Bécquer & Majure
Calycogonium torbecianum	Urb. & Ekman	Miconia torbeciana	((Urb. & Ekman)) Skean & Judd	Calycogonium torbecianum Urb. & Ekman	Miconia torbeciana ((Urb. & Ekman)) Skean & Judd
Calycogonium turbinatum	Urb. & Ekman	Miconia turbinata	((Urb. & Ekman)) Skean & Judd	Calycogonium turbinatum Urb. & Ekman	Miconia turbinata ((Urb. & Ekman)) Skean & Judd
Catocoryne linnaeoides	Hook.f.	Miconia linnaeoides	(Hook. F.) Michelang.	Catocoryne linnaeoides Hook.f.	Miconia linnaeoides (Hook. F.) Michelang.
Centronia brachycera	(Naudin) Triana	Meriania brachycera	(Naudin) Humberto Mend. & Fern. Alonso	Centronia brachycera (Naudin) Triana	Meriania brachycera (Naudin) Humberto Mend. & Fern. Alonso
Centronia crassiramis	(Naudin) Triana	Meriania crassiramis	(Naudin) Wurdack	Centronia crassiramis (Naudin) Triana	Meriania crassiramis (Naudin) Wurdack
Centronia grandiflora	Standl.	Meriania grandiflora	(Standl.) Almeda	Centronia grandiflora Standl.	Meriania grandiflora (Standl.) Almeda
Centronia haemantha	(Planch. & Lindl.) Triana	Meriania haemantha	(Planch. et Linden) Humberto Mend. & Fern. Alonso	Centronia haemantha (Planch. & Lindl.) Triana	Meriania haemantha (Planch. et Linden) Humberto Mend. & Fern. Alonso
Centronia mutabilis	Gleason	Meriania mutabilis	(Gleason) Humberto Mend. & Fern-Alonso	Centronia mutabilis Gleason	Meriania mutabilis (Gleason) Humberto Mend. & Fern-Alonso
Centronia mutisii	(Bonpl.) Triana	Meriania mutisii	(Bonpl.) Humberto Mend. & Fern-Alonso	Centronia mutisii (Bonpl.) Triana	Meriania mutisii (Bonpl.) Humberto Mend. & Fern-Alonso
Centronia phlomoides	Triana	Meriania phlomoides	(Triana) Almeda	Centronia phlomoides Triana	Meriania phlomoides (Triana) Almeda
Charianthus alpinus	(Sw.) R.A.Howard	Miconia coccinea	(Rich.) Judd & Skean	Charianthus alpinus (Sw.) R.A.Howard	Miconia coccinea (Rich.) Judd & Skean
Charianthus corymbosus	(Rich.) Cogn.	Miconia corymbosa	(Rich.) Judd & Skean	Charianthus corymbosus (Rich.) Cogn.	Miconia corymbosa (Rich.) Judd & Skean
Charianthus dominicensis	Penneys & Judd	Miconia dominicensis	(Penneys & Judd) Penneys	Charianthus dominicensis Penneys & Judd	Miconia dominicensis (Penneys & Judd) Penneys
Charianthus grenadensis	Penneys & Judd	Miconia grenadensis	(Penneys & Judd) Penneys	Charianthus grenadensis Penneys & Judd	Miconia grenadensis (Penneys & Judd) Penneys
Charianthus nodosus	(Desr.) Triana	Miconia leblondii	Judd & Skean	Charianthus nodosus (Desr.) Triana	Miconia leblondii Judd & Skean
Charianthus purpureus	D.Don	Miconia purpurea	(D.Don) Judd & Skean	Charianthus purpureus D.Don	Miconia purpurea (D.Don) Judd & Skean
Clidemia ablusa	Wurdack	Miconia ablusa	(Wurdack) Michelang.	Clidemia ablusa Wurdack	Miconia ablusa (Wurdack) Michelang.
Clidemia acostae	Wurdack	Miconia acostae	(Wurdack) Michelang.	Clidemia acostae Wurdack	Miconia acostae (Wurdack) Michelang.
Clidemia acurensis	Wurdack	Miconia acurensis	(Wurdack) Michelang.	Clidemia acurensis Wurdack	Miconia acurensis (Wurdack) Michelang.
Clidemia acutifolia	Cogn.	Miconia acutilamina	Michelang.	Clidemia acutifolia Cogn.	Miconia acutilamina Michelang.
Clidemia aguaclarensis	Wurdack	Miconia aguaclarensis	(Wurdack) Michelang.	Clidemia aguaclarensis Wurdack	Miconia aguaclarensis (Wurdack) Michelang.
Clidemia aguilarii	Kriebel & Almeda	Miconia aguilarii	(Kriebel & Almeda) Gamba & Almeda	Clidemia aguilarii Kriebel & Almeda	Miconia aguilarii (Kriebel & Almeda) Gamba & Almeda
Clidemia allardii	Wurdack	Miconia allardii	(Wurdack) Michelang.	Clidemia allardii Wurdack	Miconia allardii (Wurdack) Michelang.
Clidemia allenii	Almeda	Miconia allenii	(Almeda) Almeda	Clidemia allenii Almeda	Miconia allenii (Almeda) Almeda
Clidemia almedae	Kriebel	Miconia almedae	(Kriebel) Michelang.	Clidemia almedae Kriebel	Miconia almedae (Kriebel) Michelang.
Clidemia alternifolia	Wurdack	Miconia alternilamina	Michelang.	Clidemia alternifolia Wurdack	Miconia alternilamina Michelang.
Clidemia ampla	Cogn.	Miconia amplilamina	Michelang.	Clidemia ampla Cogn.	Miconia amplilamina Michelang.
Clidemia andersonii	Wurdack	Miconia willamandersonii	Michelang.	Clidemia andersonii Wurdack	Miconia willamandersonii Michelang.
Clidemia anisophylla	DC.	Miconia asymmetrica	Michelang.	Clidemia anisophylla DC.	Miconia asymmetrica Michelang.
Clidemia anoriensis	L.Uribe	Miconia anoriensis	(L.Uribe) Michelang.	Clidemia anoriensis L.Uribe	Miconia anoriensis (L.Uribe) Michelang.
Clidemia aphanantha	(Naudin) Sagot	Miconia aphanantha	(Naudin) Michelang.	Clidemia aphanantha (Naudin) Sagot	Miconia aphanantha (Naudin) Michelang.
Clidemia asplundii	Wurdack	Miconia erikasplundii	Gamba & Almeda	Clidemia asplundii Wurdack	Miconia erikasplundii Gamba & Almeda
Clidemia atrata	Spring	Miconia atrata	(Spring.) Wawra	Clidemia atrata Spring	Miconia atrata (Spring.) Wawra
Clidemia attenuata	(Naudin) Cogn.	Miconia attenuatifolia	Michelang.	Clidemia attenuata (Naudin) Cogn.	Miconia attenuatifolia Michelang.
Clidemia aurantiaca	Almeda & Kriebel	Miconia aurantiaca	(Almeda & Kriebel) Gamba & Almeda	Clidemia aurantiaca Almeda & Kriebel	Miconia aurantiaca (Almeda & Kriebel) Gamba & Almeda
Clidemia ayangannensis	Wurdack	Miconia ayangannensis	(Wurdack) Michelang.	Clidemia ayangannensis Wurdack	Miconia ayangannensis (Wurdack) Michelang.
Clidemia barbata	Triana	Miconia barbipetiolata	Michelang.	Clidemia barbata Triana	Miconia barbipetiolata Michelang.
Clidemia barkleyi	Wurdack	Miconia barkleyi	(Wurdack) Michelang.	Clidemia barkleyi Wurdack	Miconia barkleyi (Wurdack) Michelang.
Clidemia bernardii	Wurdack	Miconia lucianobernardii	Michelang.	Clidemia bernardii Wurdack	Miconia lucianobernardii Michelang.
Clidemia biolleyana	Cogn.	Miconia biolleyana	(Cogn.) Gamba & Almeda	Clidemia biolleyana Cogn.	Miconia biolleyana (Cogn.) Gamba & Almeda
Clidemia biserrata	DC.	Miconia biserrata	(DC.) Michelang.	Clidemia biserrata DC.	Miconia biserrata (DC.) Michelang.
Clidemia bullosa	DC.	Miconia bullosa	(DC.) Michelang.	Clidemia bullosa DC.	Miconia bullosa (DC.) Michelang.
Clidemia buntingii	Wurdack	Miconia georgebuntingii	Michelang.	Clidemia buntingii Wurdack	Miconia georgebuntingii Michelang.
Clidemia calcarata	Cogn. & Gleason	Miconia neocalcarata	Michelang.	Clidemia calcarata Cogn. & Gleason	Miconia neocalcarata Michelang.
Clidemia campii	Wurdack	Miconia waltercampii	Michelang.	Clidemia campii Wurdack	Miconia waltercampii Michelang.
Clidemia capillipes	(Triana) Cogn.	Miconia capillipes	(Triana) Michelang.	Clidemia capillipes (Triana) Cogn.	Miconia capillipes (Triana) Michelang.
Clidemia capitata	Benth.	Miconia benthamii	(Naudin) Michelang.	Clidemia capitata Benth.	Miconia benthamii (Naudin) Michelang.
Clidemia capitellata	(Bonpl.) D.Don	Miconia dependens	(Pav. ex D. Don) Judd & Majure	Clidemia capitellata (Bonpl.) D.Don	Miconia dependens (Pav. ex D. Don) Judd & Majure
Clidemia caudata	Wurdack	Miconia caudatifolia	Michelang.	Clidemia caudata Wurdack	Miconia caudatifolia Michelang.
Clidemia charadrophylla	Tutin	Miconia charadrophylla	(Tutin) Michelang.	Clidemia charadrophylla Tutin	Miconia charadrophylla (Tutin) Michelang.
Clidemia chocoensis	Wurdack	Miconia chocoensis	(Wurdack) Gamba & Almeda	Clidemia chocoensis Wurdack	Miconia chocoensis (Wurdack) Gamba & Almeda
Clidemia ciliata	Pav. ex D.Don	Miconia domociliata	Michelang.	Clidemia ciliata Pav. ex D.Don	Miconia domociliata Michelang.
Clidemia clandestina	Almeda	Miconia clandestina	(Almeda) Almeda	Clidemia clandestina Almeda	Miconia clandestina (Almeda) Almeda
Clidemia collina	Gleason	Miconia formicocollina	Michelang.	Clidemia collina Gleason	Miconia formicocollina Michelang.
Clidemia coloradensis	Almeda	Miconia neocoloradensis	Almeda	Clidemia coloradensis Almeda	Miconia neocoloradensis Almeda
Clidemia conglomerata	DC.	Miconia conglomerata	(DC) Michelang.	Clidemia conglomerata DC.	Miconia conglomerata (DC) Michelang.
Clidemia cordata	Cogn. ex Britton	Miconia neocordata	Michelang.	Clidemia cordata Cogn. ex Britton	Miconia neocordata Michelang.
Clidemia coronata	Gleason	Miconia neocoronata	Gamba & Almeda	Clidemia coronata Gleason	Miconia neocoronata Gamba & Almeda
Clidemia costaricensis	Cogn. & Gleason ex Gleason	Miconia skutchiana	Michelang.	Clidemia costaricensis Cogn. & Gleason ex Gleason	Miconia skutchiana Michelang.
Clidemia crenulata	Gleason	Miconia crenulata	(Gleason) Michelang.	Clidemia crenulata Gleason	Miconia crenulata (Gleason) Michelang.
Clidemia crossosepala	Griseb.	Miconia crossosepala	(Griseb.) Ionta & Judd	Clidemia crossosepala Griseb.	Miconia crossosepala (Griseb.) Ionta & Judd
Clidemia crotonifolia	Pilg.	Miconia neocrotonifolia	Michelang.	Clidemia crotonifolia Pilg.	Miconia neocrotonifolia Michelang.
Clidemia cruegeriana	Griseb.	Miconia neocrugeriana	Michelang.	Clidemia cruegeriana Griseb.	Miconia neocrugeriana Michelang.
Clidemia cuatrecasasii	Wurdack	Miconia quadridomius	Gamba & Almeda	Clidemia cuatrecasasii Wurdack	Miconia quadridomius Gamba & Almeda
Clidemia cursoris	Wurdack	Miconia cursoris	(Wurdack) Michelang.	Clidemia cursoris Wurdack	Miconia cursoris (Wurdack) Michelang.
Clidemia cutucuensis	Wurdack	Miconia disticha	Michelang.	Clidemia cutucuensis Wurdack	Miconia disticha Michelang.
Clidemia cymifera	Donn. Sm.	Miconia cymifera	(Donn. Sm.) Michelang.	Clidemia cymifera Donn. Sm.	Miconia cymifera (Donn. Sm.) Michelang.
Clidemia davidsei	Almeda	Miconia davidsei	(Almeda) Almeda	Clidemia davidsei Almeda	Miconia davidsei (Almeda) Almeda
Clidemia debilis	Crueg.	Miconia debilis	(Crueg.) Michelang.	Clidemia debilis Crueg.	Miconia debilis (Crueg.) Michelang.
Clidemia densiflora	(Standl.) Gleason	Miconia approximata	Gamba & Almeda	Clidemia densiflora (Standl.) Gleason	Miconia approximata Gamba & Almeda
Clidemia dentata	D.Don	Miconia dentata	(D. Don) Michelang.	Clidemia dentata D.Don	Miconia dentata (D. Don) Michelang.
Clidemia diffusa	Donn. Sm.	Miconia verapazana	Michelang.	Clidemia diffusa Donn. Sm.	Miconia verapazana Michelang.
Clidemia diguensis	Wurdack	Miconia diguensis	(Wurdack) Michelang.	Clidemia diguensis Wurdack	Miconia diguensis (Wurdack) Michelang.
Clidemia dimorphica	J.F.Macbr.	Miconia dimorphica	(J. F. Macbr.) Michelang.	Clidemia dimorphica J.F.Macbr.	Miconia dimorphica (J. F. Macbr.) Michelang.
Clidemia discolor	(Triana) Cogn.	Miconia purpureoviolacea	(Cogn.) Michelang.	Clidemia discolor (Triana) Cogn.	Miconia purpureoviolacea (Cogn.) Michelang.
Clidemia domingensis	(DC.) Cogn.	Miconia hispaniolica	Judd & Majure	Clidemia domingensis (DC.) Cogn.	Miconia hispaniolica Judd & Majure
Clidemia donnell-smithii	Cogn.	Miconia mesoamericana	Michelang.	Clidemia donnell-smithii Cogn.	Miconia mesoamericana Michelang.
Clidemia duidae	Gleason	Miconia duidae	(Gleason) Michelang.	Clidemia duidae Gleason	Miconia duidae (Gleason) Michelang.
Clidemia ecuadorensis	Gleason	Miconia ecuadorensis	(Gleason) Michelang.	Clidemia ecuadorensis Gleason	Miconia ecuadorensis (Gleason) Michelang.
Clidemia epibaterium	DC.	Miconia epibaterium	(DC) Michelang.	Clidemia epibaterium DC.	Miconia epibaterium (DC) Michelang.
Clidemia epiphytica	(Triana) Cogn.	Miconia neoepiphyitca	Michelang.	Clidemia epiphytica (Triana) Cogn.	Miconia neoepiphyitca Michelang.
Clidemia erythropogon	DC.	Miconia erytrhopogon	(DC.) Judd & Ionta	Clidemia erythropogon DC.	Miconia erytrhopogon (DC.) Judd & Ionta
Clidemia evanescens	Almeda	Miconia evanescens	(Almeda) Gamba & Almeda	Clidemia evanescens Almeda	Miconia evanescens (Almeda) Gamba & Almeda
Clidemia farinasii	Wurdack	Miconia farinasii	(Wurdack) Michelang.	Clidemia farinasii Wurdack	Miconia farinasii (Wurdack) Michelang.
Clidemia fausta	Wurdack	Miconia fausta	(Wurdack) Michelang.	Clidemia fausta Wurdack	Miconia fausta (Wurdack) Michelang.
Clidemia fendleri	Cogn.	Miconia rariflora	(Bonpl) Michelang.	Clidemia fendleri Cogn.	Miconia rariflora (Bonpl) Michelang.
Clidemia fissinervia	Gleason	Miconia fissinervia	(Gleason) Michelang.	Clidemia fissinervia Gleason	Miconia fissinervia (Gleason) Michelang.
Clidemia flexuosa	(Triana) Cogn.	Miconia flexuosa	(Triana) Michelang.	Clidemia flexuosa (Triana) Cogn.	Miconia flexuosa (Triana) Michelang.
Clidemia fluminensis	Baumgratz & D'El Rei Souza	Miconia pleiofluminensis	R.Goldenb & Michelang.	Clidemia fluminensis Baumgratz & D'El Rei Souza	Miconia pleiofluminensis R.Goldenb & Michelang.
Clidemia foliosa	Gleason	Miconia formicofoliosa	Michelang.	Clidemia foliosa Gleason	Miconia formicofoliosa Michelang.
Clidemia folsomii	Almeda	Miconia folsomii	(Almeda) Almeda	Clidemia folsomii Almeda	Miconia folsomii (Almeda) Almeda
Clidemia foreroi	Wurdack	Miconia foreroi	(Wurdack) Michelang.	Clidemia foreroi Wurdack	Miconia foreroi (Wurdack) Michelang.
Clidemia francavillana	Cogn.	Miconia pseudodebilis	Michelang.	Clidemia francavillana Cogn.	Miconia pseudodebilis Michelang.
Clidemia fraterna	Gleason	Miconia fraterna	(Gleason) Michelang.	Clidemia fraterna Gleason	Miconia fraterna (Gleason) Michelang.
Clidemia fulva	Gleason	Miconia crocina	Michelang.	Clidemia fulva Gleason	Miconia crocina Michelang.
Clidemia garciabarrigae	Wurdack	Miconia garcia-barrigae	(Wurdack) Almeda	Clidemia garciabarrigae Wurdack	Miconia garcia-barrigae (Wurdack) Almeda
Clidemia globuliflora	(Cogn.) L.O.Williams	Miconia reflexa	(Gleason) Michelang.	Clidemia globuliflora (Cogn.) L.O.Williams	Miconia reflexa (Gleason) Michelang.
Clidemia graciliflora	Huber	Miconia graciliflora	(Huber) Michelang.	Clidemia graciliflora Huber	Miconia graciliflora (Huber) Michelang.
Clidemia gracilipes	Gleason	Miconia gracilipes	(Gleason) Michelang.	Clidemia gracilipes Gleason	Miconia gracilipes (Gleason) Michelang.
Clidemia gracilis	Pittier	Miconia pseudoalternifolia	Michelang.	Clidemia gracilis Pittier	Miconia pseudoalternifolia Michelang.
Clidemia grandifolia	Cogn.	Miconia badilloi	Michelang.	Clidemia grandifolia Cogn.	Miconia badilloi Michelang.
Clidemia granvillei	Wurdack	Miconia granvillei	(Wurdack) Michelang.	Clidemia granvillei Wurdack	Miconia granvillei (Wurdack) Michelang.
Clidemia grisebachii	Cogn.	Miconia augustgrisebachii	Ionta & Judd	Clidemia grisebachii Cogn.	Miconia augustgrisebachii Ionta & Judd
Clidemia guadaloupensis	(DC) Griseb.	Miconia guadalupensis	(DC.) Judd, Ionta, & Majure	Clidemia guadaloupensis (DC) Griseb.	Miconia guadalupensis (DC.) Judd, Ionta, & Majure
Clidemia hammelii	Almeda	Miconia hammelii	(Almeda) Almeda	Clidemia hammelii Almeda	Miconia hammelii (Almeda) Almeda
Clidemia heptamera	Wurdack	Miconia heptamera	(Wurdack) Michelang.	Clidemia heptamera Wurdack	Miconia heptamera (Wurdack) Michelang.
Clidemia heteronervis	(Naudin) Wurdack	Miconia heteronervis	(Naudin) Michelang.	Clidemia heteronervis (Naudin) Wurdack	Miconia heteronervis (Naudin) Michelang.
Clidemia heteroneura	(Schrank & Mart. ex DC.) Cogn.	Miconia heteroneura	(Schrank. et Mart. ex DC.) Michelang.	Clidemia heteroneura (Schrank & Mart. ex DC.) Cogn.	Miconia heteroneura (Schrank. et Mart. ex DC.) Michelang.
Clidemia heterophylla	(Desr.) Gleason	Miconia formicoheterophylla	Michelang.	Clidemia heterophylla (Desr.) Gleason	Miconia formicoheterophylla Michelang.
Clidemia hirta	(L.) D.Don	Miconia crenata	(Vahl.) Michelang.	Clidemia hirta (L.) D.Don	Miconia crenata (Vahl.) Michelang.
Clidemia imparilis	Wurdack	Miconia imparilis	(Wurdack) Michelang.	Clidemia imparilis Wurdack	Miconia imparilis (Wurdack) Michelang.
Clidemia inobsepta	Wurdack	Miconia inobsepta	(Wurdack) Michelang.	Clidemia inobsepta Wurdack	Miconia inobsepta (Wurdack) Michelang.
Clidemia inopinata	Almeda	Miconia inopinata	(Almeda) Almeda	Clidemia inopinata Almeda	Miconia inopinata (Almeda) Almeda
Clidemia inopogon	Mart.	Miconia ionopogon	(DC) R.Goldenb.	Clidemia inopogon Mart.	Miconia ionopogon (DC) R.Goldenb.
Clidemia intonsa	E.Cotton & W.Meier	Miconia intonsa	(E.Cotton & W.Meier) Michelang.	Clidemia intonsa E.Cotton & W.Meier	Miconia intonsa (E.Cotton & W.Meier) Michelang.
Clidemia involucrata	DC.	Miconia cephaloides	Michelang.	Clidemia involucrata DC.	Miconia cephaloides Michelang.
Clidemia japurensis	DC.	Miconia heteroclita	(Naudin) Michelang.	Clidemia japurensis DC.	Miconia heteroclita (Naudin) Michelang.
Clidemia juruensis	(Pilg.) Gleason	Miconia formicojuruensis	Michelang.	Clidemia juruensis (Pilg.) Gleason	Miconia formicojuruensis Michelang.
Clidemia kappleri	Cogn.	Miconia augustkappleri	Michelang.	Clidemia kappleri Cogn.	Miconia augustkappleri Michelang.
Clidemia killipii	Gleason	Miconia ellsworthii	Michelang.	Clidemia killipii Gleason	Miconia ellsworthii Michelang.
Clidemia laevifolia	Gleason	Miconia laevifolia	(Gleason) Michelang.	Clidemia laevifolia Gleason	Miconia laevifolia (Gleason) Michelang.
Clidemia lanuginosa	Almeda	Miconia neolanuginosa	Almeda	Clidemia lanuginosa Almeda	Miconia neolanuginosa Almeda
Clidemia laxiflora	(Schltdl.) Walp. ex Naudin	Miconia laxiflora	(Schltdl.) Michelang.	Clidemia laxiflora (Schltdl.) Walp. ex Naudin	Miconia laxiflora (Schltdl.) Michelang.
Clidemia leucandra	C.Wright ex Griseb.	Miconia leucandra	(C.Wright ex Griseb.) Judd & Ionta	Clidemia leucandra C.Wright ex Griseb.	Miconia leucandra (C.Wright ex Griseb.) Judd & Ionta
Clidemia leucandra var. divaricata	C.Wright ex Griseb.	Miconia divaricatiflora	Judd & Becquer	Clidemia leucandra var. divaricata C.Wright ex Griseb.	Miconia divaricatiflora Judd & Becquer
Clidemia linearis	(Gleason) Wurdack	Miconia linearis	(Gleason) Michelang.	Clidemia linearis (Gleason) Wurdack	Miconia linearis (Gleason) Michelang.
Clidemia longifolia	Gleason	Miconia adventitia	Michelang.	Clidemia longifolia Gleason	Miconia adventitia Michelang.
Clidemia longipedunculata	E.Cotton	Miconia cottoniana	Michelang.	Clidemia longipedunculata E.Cotton	Miconia cottoniana Michelang.
Clidemia macropetala	R.O. Williams	Miconia macropetala	Michelang.	Clidemia macropetala R.O. Williams	Miconia macropetala Michelang.
Clidemia marahuacensis	Wurdack	Miconia marahuacencis	(Wurdack) Michelang.	Clidemia marahuacensis Wurdack	Miconia marahuacencis (Wurdack) Michelang.
Clidemia matudae	L.O.Williams	Miconia matudae	(L. O. Wms.) Michelang.	Clidemia matudae L.O.Williams	Miconia matudae (L. O. Wms.) Michelang.
Clidemia micrantha	Sagot	Miconia drosera	(Sagot) Michelang.	Clidemia micrantha Sagot	Miconia drosera (Sagot) Michelang.
Clidemia microthyrsa	R.O.Williams	Miconia microthyrsa	(L.O.Wms.) Michelang.	Clidemia microthyrsa R.O.Williams	Miconia microthyrsa (L.O.Wms.) Michelang.
Clidemia monantha	L.O.Williams	Miconia monantha	(L. O. Wms.) Michelang.	Clidemia monantha L.O.Williams	Miconia monantha (L. O. Wms.) Michelang.
Clidemia morichensis	Wurdack	Miconia morichensis	(Wurdack) Michelang.	Clidemia morichensis Wurdack	Miconia morichensis (Wurdack) Michelang.
Clidemia mortoniana	Standl.	Miconia mortoniana	(Standl.) Michelang.	Clidemia mortoniana Standl.	Miconia mortoniana (Standl.) Michelang.
Clidemia myrmecina	Gleason	Miconia myrmecina	(Gleason) Michelang.	Clidemia myrmecina Gleason	Miconia myrmecina (Gleason) Michelang.
Clidemia neblinae	Wurdack	Miconia neblinae	(Wurdack) Michelang.	Clidemia neblinae Wurdack	Miconia neblinae (Wurdack) Michelang.
Clidemia novemnervia	(DC.) Triana	Miconia bullatifolia	Michelang.	Clidemia novemnervia (DC.) Triana	Miconia bullatifolia Michelang.
Clidemia obliqua	Griseb. ex Cogn.	Miconia alaticualis	Michelang.	Clidemia obliqua Griseb. ex Cogn.	Miconia alaticualis Michelang.
Clidemia oblonga	Gleason	Miconia oblonga	(Gleason) Michelang.	Clidemia oblonga Gleason	Miconia oblonga (Gleason) Michelang.
Clidemia octona	(Bonpl.) L.O.Williams	Miconia octona	(Bonpl.) Judd & Majure	Clidemia octona (Bonpl.) L.O.Williams	Miconia octona (Bonpl.) Judd & Majure
Clidemia ombrophila	Gleason	Miconia silviphila	Michelang.	Clidemia ombrophila Gleason	Miconia silviphila Michelang.
Clidemia ostentata	Wurdack	Miconia ostentata	(Wurdack) Michelang.	Clidemia ostentata Wurdack	Miconia ostentata (Wurdack) Michelang.
Clidemia ostrina	Gleason	Miconia ostrina	(Gleason) Michelang.	Clidemia ostrina Gleason	Miconia ostrina (Gleason) Michelang.
Clidemia oxyura	(Naudin) Triana	Miconia oxyura	(Naudin) Michelang.	Clidemia oxyura (Naudin) Triana	Miconia oxyura (Naudin) Michelang.
Clidemia pakaraimae	Wurdack	Miconia pakaraimae	(Wurdack) Michelang.	Clidemia pakaraimae Wurdack	Miconia pakaraimae (Wurdack) Michelang.
Clidemia pectinata	Almeda	Miconia neopectinata	Almeda	Clidemia pectinata Almeda	Miconia neopectinata Almeda
Clidemia petiolaris	(Schltdl. & Cham.) Schltdl. ex Triana	Miconia petiolaris	(Schltdl. & Cham.) Michelang.	Clidemia petiolaris (Schltdl. & Cham.) Schltdl. ex Triana	Miconia petiolaris (Schltdl. & Cham.) Michelang.
Clidemia petiolata	DC.	Miconia petiolata	(DC.) Michelang.	Clidemia petiolata DC.	Miconia petiolata (DC.) Michelang.
Clidemia pilosa	Pav. ex D.Don	Miconia neopilosa	Michelang.	Clidemia pilosa Pav. ex D.Don	Miconia neopilosa Michelang.
Clidemia piperifolia	Gleason	Miconia piperilamina	Michelang.	Clidemia piperifolia Gleason	Miconia piperilamina Michelang.
Clidemia plumosa	(Desr.) DC.	Miconia berteroi	(DC) Judd & Ionta	Clidemia plumosa (Desr.) DC.	Miconia berteroi (DC) Judd & Ionta
Clidemia pterosepala	(Urb.) Alain	Miconia pterosepala	Urb.	Clidemia pterosepala (Urb.) Alain	Miconia pterosepala Urb.
Clidemia pubescens	Gleason	Miconia pubescens	(Gleason) Michelang.	Clidemia pubescens Gleason	Miconia pubescens (Gleason) Michelang.
Clidemia purpurea	Pav. ex Don	Miconia atropurpurea	Gamba & Almeda	Clidemia purpurea Pav. ex Don	Miconia atropurpurea Gamba & Almeda
Clidemia pustulata	DC.	Miconia fenestrata	(Seem.) Michelang.	Clidemia pustulata DC.	Miconia fenestrata (Seem.) Michelang.
Clidemia pycnantha	Urb. & Ekman	Miconia pycnantha	(Urb. & Ekman) Ionta, Judd & Skean	Clidemia pycnantha Urb. & Ekman	Miconia pycnantha (Urb. & Ekman) Ionta, Judd & Skean
Clidemia pycnaster	Tutin	Miconia pycnaster	(Tutin) Michelang.	Clidemia pycnaster Tutin	Miconia pycnaster (Tutin) Michelang.
Clidemia quinquenervia	(Mill.) Almeda	Miconia quinquenervia	(Mill.) Gamba & Almeda	Clidemia quinquenervia (Mill.) Almeda	Miconia quinquenervia (Mill.) Gamba & Almeda
Clidemia radicans	Cogn.	Miconia radicans	(Cogn.) Gamba & Almeda	Clidemia radicans Cogn.	Miconia radicans (Cogn.) Gamba & Almeda
Clidemia reitziana	Cogn. & Gleason ex Gleason	Miconia reitziana	(Cogn. & Gleason ex Gleason) Gamba & Almeda	Clidemia reitziana Cogn. & Gleason ex Gleason	Miconia reitziana (Cogn. & Gleason ex Gleason) Gamba & Almeda
Clidemia repens	Triana	Miconia repens	(Triana) Michelang.	Clidemia repens Triana	Miconia repens (Triana) Michelang.
Clidemia retropila	DC	Miconia retropila	(DC.) Ocampo & Almeda	Clidemia retropila DC	Miconia retropila (DC.) Ocampo & Almeda
Clidemia rodriguezii	Almeda	Miconia rodriguezii	(Almeda) Almeda	Clidemia rodriguezii Almeda	Miconia rodriguezii (Almeda) Almeda
Clidemia rubra	(Aubl.) Mart.	Miconia rubra	(Aubl.) Mabb.	Clidemia rubra (Aubl.) Mart.	Miconia rubra (Aubl.) Mabb.
Clidemia rubrinervis	(Naudin) Cogn.	Miconia rubrinervis	(Naudin) Judd & Becquer	Clidemia rubrinervis (Naudin) Cogn.	Miconia rubrinervis (Naudin) Judd & Becquer
Clidemia rubripila	Cogn.	Miconia rubripila	(Cogn.) Judd & Ionta	Clidemia rubripila Cogn.	Miconia rubripila (Cogn.) Judd & Ionta
Clidemia ruddae	Wurdack	Miconia ruddae	(Wurdack) Michelang.	Clidemia ruddae Wurdack	Miconia ruddae (Wurdack) Michelang.
Clidemia saltuensis	Wurdack	Miconia chichirivichensis	Michelang.	Clidemia saltuensis Wurdack	Miconia chichirivichensis Michelang.
Clidemia sandwithii	Wurdack	Miconia sandwithii	(Wurdack) Michelang.	Clidemia sandwithii Wurdack	Miconia sandwithii (Wurdack) Michelang.
Clidemia saulensis	Wurdack	Miconia saulensis	(Wurdack) Michelang.	Clidemia saulensis Wurdack	Miconia saulensis (Wurdack) Michelang.
Clidemia scalpta	(Vent.) F. S. Axelrod	Miconia scalpta	(Vent.) Ionta, Judd & Skean	Clidemia scalpta (Vent.) F. S. Axelrod	Miconia scalpta (Vent.) Ionta, Judd & Skean
Clidemia scopulina	(Brandegee) L.O.Williams	Miconia scopulina	(Brand.) Michelang.	Clidemia scopulina (Brandegee) L.O.Williams	Miconia scopulina (Brand.) Michelang.
Clidemia semijuga	(Gleason) Wurdack	Miconia semijuga	(Gleason) Michelang.	Clidemia semijuga (Gleason) Wurdack	Miconia semijuga (Gleason) Michelang.
Clidemia septuplinervia	Cogn.	Miconia trichocalyx	(Pittier) Michelang. & Judd	Clidemia septuplinervia Cogn.	Miconia trichocalyx (Pittier) Michelang. & Judd
Clidemia sericea	D.Don	Miconia sericea	(D. Don) Michelang.	Clidemia sericea D.Don	Miconia sericea (D. Don) Michelang.
Clidemia serpens	(Triana) Cogn.	Miconia serpens	(Triana) Michelang.	Clidemia serpens (Triana) Cogn.	Miconia serpens (Triana) Michelang.
Clidemia sessiliflora	(Naudin) Cogn.	Miconia sessiliflora	(Naudin) Michelang.	Clidemia sessiliflora (Naudin) Cogn.	Miconia sessiliflora (Naudin) Michelang.
Clidemia setosa	(Triana) Gleason	Miconia formicosetosa	Michelang.	Clidemia setosa (Triana) Gleason	Miconia formicosetosa Michelang.
Clidemia siapensis	Wurdack	Miconia siapensis	(Wurdack) Michelang.	Clidemia siapensis Wurdack	Miconia siapensis (Wurdack) Michelang.
Clidemia silvicola	Gleason	Miconia silvicola	(Gleason) Michelang.	Clidemia silvicola Gleason	Miconia silvicola (Gleason) Michelang.
Clidemia simpsonii	Wurdack	Miconia simpsonii	(Wurdack) Michelang.	Clidemia simpsonii Wurdack	Miconia simpsonii (Wurdack) Michelang.
Clidemia smithii	Gleason	Miconia albertsmithii	Michelang.	Clidemia smithii Gleason	Miconia albertsmithii Michelang.
Clidemia spectabilis	Gleason	Miconia spectabilis	(Gleason) Michelang.	Clidemia spectabilis Gleason	Miconia spectabilis (Gleason) Michelang.
Clidemia sprucei	Gleason	Miconia richardsprucei	Michelang.	Clidemia sprucei Gleason	Miconia richardsprucei Michelang.
Clidemia stellipilis	(Gleason) Wurdack	Miconia sororopana	Michelang.	Clidemia stellipilis (Gleason) Wurdack	Miconia sororopana Michelang.
Clidemia steyermarkii	Wurdack	Miconia julianii	Michelang.	Clidemia steyermarkii Wurdack	Miconia julianii Michelang.
Clidemia strigillosa	(Sw.) DC.	Miconia strigillosa	(Sw.) Judd & Ionta	Clidemia strigillosa (Sw.) DC.	Miconia strigillosa (Sw.) Judd & Ionta
Clidemia submontana	Rose ex Gleason	Miconia submontana	(Rose ex Gleason) Michelang.	Clidemia submontana Rose ex Gleason	Miconia submontana (Rose ex Gleason) Michelang.
Clidemia subpeltata	Kriebel & Almeda	Miconia subpeltata	(Kriebel & Almeda) Almeda	Clidemia subpeltata Kriebel & Almeda	Miconia subpeltata (Kriebel & Almeda) Almeda
Clidemia swartzii	Griseb.	Miconia pilosa	(Sw) Judd & Ionta	Clidemia swartzii Griseb.	Miconia pilosa (Sw) Judd & Ionta
Clidemia taurina	Gleason	Miconia taurina	(Gleason) Michelang.	Clidemia taurina Gleason	Miconia taurina (Gleason) Michelang.
Clidemia tenebrosa	Almeda	Miconia tenebrosa	(Almeda) Almeda	Clidemia tenebrosa Almeda	Miconia tenebrosa (Almeda) Almeda
Clidemia tepuiensis	Wurdack	Miconia nebulensis	Michelang.	Clidemia tepuiensis Wurdack	Miconia nebulensis Michelang.
Clidemia tetrapetala	Almeda	Miconia tetrapetala	(Almeda) Almeda	Clidemia tetrapetala Almeda	Miconia tetrapetala (Almeda) Almeda
Clidemia tetraptera	Cogn.	Miconia tetraptera	(Cogn.) Ionta, Judd & Skean	Clidemia tetraptera Cogn.	Miconia tetraptera (Cogn.) Ionta, Judd & Skean
Clidemia tillettii	Wurdack	Miconia stephentillettii	Michelang.	Clidemia tillettii Wurdack	Miconia stephentillettii Michelang.
Clidemia tococoidea	(DC.) Gleason	Miconia tococoidea	(Gleason) Michelang.	Clidemia tococoidea (DC.) Gleason	Miconia tococoidea (Gleason) Michelang.
Clidemia trichosantha	Almeda	Miconia trichosantha	(Almeda) Almeda	Clidemia trichosantha Almeda	Miconia trichosantha (Almeda) Almeda
Clidemia trichotoma	C.Wright ex Griseb.	Miconia hirticalyx	Judd & Becquer	Clidemia trichotoma C.Wright ex Griseb.	Miconia hirticalyx Judd & Becquer
Clidemia trinitensis	(Crueg.) Griseb.	Miconia trinitensis	(Crueg) Michelang.	Clidemia trinitensis (Crueg.) Griseb.	Miconia trinitensis (Crueg) Michelang.
Clidemia tuerckheimii	(Donn. Sm.) Gleason	Miconia hanstuerckheimii	Michelang.	Clidemia tuerckheimii (Donn. Sm.) Gleason	Miconia hanstuerckheimii Michelang.
Clidemia ulei	Pilg.	Miconia ernstulei	Michelang.	Clidemia ulei Pilg.	Miconia ernstulei Michelang.
Clidemia umbrosa	(Sw.) Cogn.	Miconia sciaphila	Judd & Ionta	Clidemia umbrosa (Sw.) Cogn.	Miconia sciaphila Judd & Ionta
Clidemia urceolata	DC.	Miconia neourceolata	Michelang.	Clidemia urceolata DC.	Miconia neourceolata Michelang.
Clidemia uribei	Wurdack	Miconia lorenzouribei	Michelang.	Clidemia uribei Wurdack	Miconia lorenzouribei Michelang.
Clidemia urticoides	Pilg.	Miconia urticilamina	Michelang.	Clidemia urticoides Pilg.	Miconia urticilamina Michelang.
Clidemia utleyana	Almeda	Miconia utleyana	(Almeda) Almeda	Clidemia utleyana Almeda	Miconia utleyana (Almeda) Almeda
Clidemia vallicola	Gleason	Miconia vallicola	(Gleason) Michelang.	Clidemia vallicola Gleason	Miconia vallicola (Gleason) Michelang.
Clidemia variifolia	Wurdack	Miconia variifolia	(Wurdack) Michelang.	Clidemia variifolia Wurdack	Miconia variifolia (Wurdack) Michelang.
Clidemia vegaensis	Cogn.	Miconia vegaensis	(Cogn.) Judd, Bécquer & Majure	Clidemia vegaensis Cogn.	Miconia vegaensis (Cogn.) Judd, Bécquer & Majure
Clidemia venosa	(Gleason) Wurdack	Miconia venosa	(Gleason) Michelang.	Clidemia venosa (Gleason) Wurdack	Miconia venosa (Gleason) Michelang.
Clidemia ventricosa	Almeda	Miconia ventricosa	(Almeda) Almeda	Clidemia ventricosa Almeda	Miconia ventricosa (Almeda) Almeda
Clidemia verruculosa	Wurdack	Miconia verruculosa	(Wurdack) P.Jørg. & C.Ulloa	Clidemia verruculosa Wurdack	Miconia verruculosa (Wurdack) P.Jørg. & C.Ulloa
Comolia ayangannae	Wurdack	Acisanthera ayangannae	(Wurdack)M.J.R.Rocha&P.J.F.Guim.,	Comolia ayangannae Wurdack	Acisanthera ayangannae (Wurdack)M.J.R.Rocha&P.J.F.Guim.,
Comolia coriacea	Gleason	Comoliopsis coriacea	(Gleason) M.J.R.Rocha & P.J.F.Guim.	Comolia coriacea Gleason	Comoliopsis coriacea (Gleason) M.J.R.Rocha & P.J.F.Guim.
Comolia edmundoi	Brade	Fritzschia edmundoi	(Brade) M.J.R.Rocha & P.J.F.Guim.	Comolia edmundoi Brade	Fritzschia edmundoi (Brade) M.J.R.Rocha & P.J.F.Guim.
Comolia lanceiflora	(DC.) Triana	Fritzschia lanceiflora	(DC.) M.J.R.Rocha & P.J.F.Guim.	Comolia lanceiflora (DC.) Triana	Fritzschia lanceiflora (DC.) M.J.R.Rocha & P.J.F.Guim.
Comolia montana	Gleason	Comoliopsis montana	(Gleason) M.J.R.Rocha & P.J.F.Guim.	Comolia montana Gleason	Comoliopsis montana (Gleason) M.J.R.Rocha & P.J.F.Guim.
Comolia sertularia	(DC.) Triana	Fritzschia sertularia	(DC.) M.J.R.Rocha & P.J.F.Guim.	Comolia sertularia (DC.) Triana	Fritzschia sertularia (DC.) M.J.R.Rocha & P.J.F.Guim.
Comolia sessilis	(Spreng.) Triana	Fritzschia sessilis	(Spreng.) M.J.R.Rocha & P.J.F.Guim.	Comolia sessilis (Spreng.) Triana	Fritzschia sessilis (Spreng.) M.J.R.Rocha & P.J.F.Guim.
Comolia stenodon	Triana	Fritzschia stenodon	(Triana) M.J.R.Rocha & P.J.F.Guim.	Comolia stenodon Triana	Fritzschia stenodon (Triana) M.J.R.Rocha & P.J.F.Guim.
Comolia vernicosa	(Benth.) Triana	Leiostegia vernicosa	Benth.	Comolia vernicosa (Benth.) Triana	Leiostegia vernicosa Benth.
Conostegia apiculata	Wurdack	Miconia conoapiculata	Michelang.	Conostegia apiculata Wurdack	Miconia conoapiculata Michelang.
Conostegia arborea	(Schltdl.) Steud.	Miconia galeottii	(Naudin) Michelang.	Conostegia arborea (Schltdl.) Steud.	Miconia galeottii (Naudin) Michelang.
Conostegia attenuata	Triana	Miconia conoattenuata	Michelang.	Conostegia attenuata Triana	Miconia conoattenuata Michelang.
Conostegia balbisiana	Ser. ex DC.	Miconia balbisiana	(Ser. ex Dc.) Michelang.	Conostegia balbisiana Ser. ex DC.	Miconia balbisiana (Ser. ex Dc.) Michelang.
Conostegia bigibbosa	Cogn.	Miconia bigibbosa	(Cogn.) Michelang.	Conostegia bigibbosa Cogn.	Miconia bigibbosa (Cogn.) Michelang.
Conostegia bracteata	Triana	Miconia conobracteata	Michelang.	Conostegia bracteata Triana	Miconia conobracteata Michelang.
Conostegia brenesii	Standl.	Miconia conobrenesii	Michelang.	Conostegia brenesii Standl.	Miconia conobrenesii Michelang.
Conostegia caelestis	Standl.	Miconia caelestis	(Standl.) Michelang.	Conostegia caelestis Standl.	Miconia caelestis (Standl.) Michelang.
Conostegia centronioides	Markgr.	Miconia conocentronioides	Michelang.	Conostegia centronioides Markgr.	Miconia conocentronioides Michelang.
Conostegia centronioides var. lancifolia	Markgr.	Miconia conolancifolia	Michelang.	Conostegia centronioides var. lancifolia Markgr.	Miconia conolancifolia Michelang.
Conostegia chiriquensis	Gleason	Miconia conochiriquensis	Michelang.	Conostegia chiriquensis Gleason	Miconia conochiriquensis Michelang.
Conostegia cinnamomea	(Beurl.) Wurdack	Miconia cinnamomea	Beurl.	Conostegia cinnamomea (Beurl.) Wurdack	Miconia cinnamomea Beurl.
Conostegia cuatrecasii	Gleason	Miconia conocuatrecasii	Michelang.	Conostegia cuatrecasii Gleason	Miconia conocuatrecasii Michelang.
Conostegia dentata	Triana	Miconia conodentata	Michelang.	Conostegia dentata Triana	Miconia conodentata Michelang.
Conostegia extinctoria	(Bonpl.) D.Don ex DC.	Miconia extinctoria	(Bonpl.) Michelang.	Conostegia extinctoria (Bonpl.) D.Don ex DC.	Miconia extinctoria (Bonpl.) Michelang.
Conostegia fragrantissima	Almeda	Miconia fragrantissima	(Almeda) Michelang. & Almeda	Conostegia fragrantissima Almeda	Miconia fragrantissima (Almeda) Michelang. & Almeda
Conostegia hirtella	Cogn.	Miconia conohirtella	Michelang.	Conostegia hirtella Cogn.	Miconia conohirtella Michelang.
Conostegia icosandra	(Sw. ex Wikstr.) Urb.	Miconia subhirsuta	(DC.) M. Gomez	Conostegia icosandra (Sw. ex Wikstr.) Urb.	Miconia subhirsuta (DC.) M. Gomez
Conostegia inusitata	Wurdack	Miconia inusitata	(Wurdack) Michelang. & R.Goldenb.	Conostegia inusitata Wurdack	Miconia inusitata (Wurdack) Michelang. & R.Goldenb.
Conostegia jaliscana	Standl.	Miconia jaliscana	(Standl.) Michelang.	Conostegia jaliscana Standl.	Miconia jaliscana (Standl.) Michelang.
Conostegia lasiopoda	Benth.	Miconia lasiopoda	(Benth.) Michelang.	Conostegia lasiopoda Benth.	Miconia lasiopoda (Benth.) Michelang.
Conostegia lindenii	Cogn.	Miconia lomensis	(Urb.) Michelang.	Conostegia lindenii Cogn.	Miconia lomensis (Urb.) Michelang.
Conostegia macrantha	O.Berg ex Triana	Miconia conomacrantha	Michelang.	Conostegia macrantha O.Berg ex Triana	Miconia conomacrantha Michelang.
Conostegia micrantha	Standl.	Miconia conomicrantha	Michelang.	Conostegia micrantha Standl.	Miconia conomicrantha Michelang.
Conostegia montana	(Sw.) D.Don ex DC.	Miconia cooperi	(Cogn) Michelang.	Conostegia montana (Sw.) D.Don ex DC.	Miconia cooperi (Cogn) Michelang.
Conostegia monteleagreana	Cogn.	Miconia monteleagreana	(Cogn) Michelang.	Conostegia monteleagreana Cogn.	Miconia monteleagreana (Cogn) Michelang.
Conostegia muriculata	Almeda	Miconia muriculata	(Almeda) Michelang. & Almeda	Conostegia muriculata Almeda	Miconia muriculata (Almeda) Michelang. & Almeda
Conostegia oerstediana	O.Berg ex Triana	Miconia oerstediana	(O. Berg ex Triana) Michelang.	Conostegia oerstediana O.Berg ex Triana	Miconia oerstediana (O. Berg ex Triana) Michelang.
Conostegia ortizae	Kriebel	Miconia ortizae	(Kriebel) Michelang.	Conostegia ortizae Kriebel	Miconia ortizae (Kriebel) Michelang.
Conostegia pittieri	Cogn.	Miconia durandii	Michelang. & P.Jørg	Conostegia pittieri Cogn.	Miconia durandii Michelang. & P.Jørg
Conostegia pittieri	Cogn. ex T.Durand	Miconia donnell-smithii	(Cogn.) Michelang.	Conostegia pittieri Cogn. ex T.Durand	Miconia donnell-smithii (Cogn.) Michelang.
Conostegia plumosa	L.O.Williams	Miconia conoplumosa	Michelang.	Conostegia plumosa L.O.Williams	Miconia conoplumosa Michelang.
Conostegia polyandra	Benth.	Miconia rupicola	Gleason	Conostegia polyandra Benth.	Miconia rupicola Gleason
Conostegia procera	(Sw.) D.Don	Miconia gloriosa	(Macfad) Michelang.	Conostegia procera (Sw.) D.Don	Miconia gloriosa (Macfad) Michelang.
Conostegia pyxidata	Proctor	Miconia pyxidata	(Proctor) Michelang.	Conostegia pyxidata Proctor	Miconia pyxidata (Proctor) Michelang.
Conostegia rhodopetala	Donn. Sm.	Miconia rhodopetala	(Donn-Sm.) Michelang.	Conostegia rhodopetala Donn. Sm.	Miconia rhodopetala (Donn-Sm.) Michelang.
Conostegia rubiginosa	Gleason	Miconia conorubiginosa	Michelang.	Conostegia rubiginosa Gleason	Miconia conorubiginosa Michelang.
Conostegia rufescens	Naudin	Miconia conorufescens	Michelang.	Conostegia rufescens Naudin	Miconia conorufescens Michelang.
Conostegia setifera	Standl.	Miconia conosetifera	Michelang.	Conostegia setifera Standl.	Miconia conosetifera Michelang.
Conostegia setosa	Triana	Miconia conosetosa	Michelang.	Conostegia setosa Triana	Miconia conosetosa Michelang.
Conostegia speciosa	Naudin	Miconia conospeciosa	Michelang.	Conostegia speciosa Naudin	Miconia conospeciosa Michelang.
Conostegia subcrustulata	(Beurl.) Triana	Miconia subcrustulata	Beurl.	Conostegia subcrustulata (Beurl.) Triana	Miconia subcrustulata Beurl.
Conostegia superba	Naudin	Miconia baillonii	M. Gomez	Conostegia superba Naudin	Miconia baillonii M. Gomez
Conostegia tenuifolia	Donn. Sm.	Miconia tenuifolia	(Donn. Sm.) Michelang.	Conostegia tenuifolia Donn. Sm.	Miconia tenuifolia (Donn. Sm.) Michelang.
Conostegia volcanalis	Standl. & Steyerm.	Miconia volcanalis	(Standl. & Steyerm.) Michelang.	Conostegia volcanalis Standl. & Steyerm.	Miconia volcanalis (Standl. & Steyerm.) Michelang.
Conostegia vulcanicola	Donn. Sm.	Miconia vulcanicola	(Donn. Sm.) Michelang.	Conostegia vulcanicola Donn. Sm.	Miconia vulcanicola (Donn. Sm.) Michelang.
Conostegia xalapensis	(Bonpl.) D.Don ex DC.	Miconia xalapensis	(Bonpl.) M. Gomez	Conostegia xalapensis (Bonpl.) D.Don ex DC.	Miconia xalapensis (Bonpl.) M. Gomez
Diolena agrimonioides	Triana	Triolena agrimonioides	(Triana) Almeda & Alvear	Diolena agrimonioides Triana	Triolena agrimonioides (Triana) Almeda & Alvear
Diolena allardii	Wurdack	Triolena allardii	(Wurdack) Wurdack	Diolena allardii Wurdack	Triolena allardii (Wurdack) Wurdack
Diolena amazonica	Pilg.	Triolena amazonica	(Pilg.) Wurdack	Diolena amazonica Pilg.	Triolena amazonica (Pilg.) Wurdack
Diolena auriculata	Triana	Triolena auriculata	(Triana) Almeda & Alvear	Diolena auriculata Triana	Triolena auriculata (Triana) Almeda & Alvear
Diolena calciphila	Standl. & Steyerm.	Triolena calciphila	(Standl. & Steyerm.) Standl. & L.O.Williams	Diolena calciphila Standl. & Steyerm.	Triolena calciphila (Standl. & Steyerm.) Standl. & L.O.Williams
Diolena campii	Wurdack	Triolena campii	(Wurdack) Wurdack	Diolena campii Wurdack	Triolena campii (Wurdack) Wurdack
Diolena hygrophylla	Naudin	Triolena hygrophylla	(Naudin) L.O.Williams	Diolena hygrophylla Naudin	Triolena hygrophylla (Naudin) L.O.Williams
Diolena lanceolata	Gleason	Triolena lanceolata	(Gleason) Almeda & Alvear	Diolena lanceolata Gleason	Triolena lanceolata (Gleason) Almeda & Alvear
Diolena obliqua	Triana	Triolena obliqua	(Triana) Wurdack	Diolena obliqua Triana	Triolena obliqua (Triana) Wurdack
Diolena pileoides	Triana	Triolena pileoides	(Triana) Wurdack	Diolena pileoides Triana	Triolena pileoides (Triana) Wurdack
Diolena pluvialis	Wurdack	Triolena pluvialis	(Wurdack) Wurdack	Diolena pluvialis Wurdack	Triolena pluvialis (Wurdack) Wurdack
Diolena purpurea	Gleason	Triolena purpurea	(Gleason) Almeda & Alvear	Diolena purpurea Gleason	Triolena purpurea (Gleason) Almeda & Alvear
Diolena spicata	Triana	Triolena spicata	(Triana) L.O.Williams	Diolena spicata Triana	Triolena spicata (Triana) L.O.Williams
Diolena stenophylla	Standl. & Steyerm.	Triolena stenophylla	(Standl. & Steyerm.) Standl. & L.O.Williams	Diolena stenophylla Standl. & Steyerm.	Triolena stenophylla (Standl. & Steyerm.) Standl. & L.O.Williams
Diplarpea paleacea	Triana	Triolena paleacea	(Triana) Almeda & Alvear,	Diplarpea paleacea Triana	Triolena paleacea (Triana) Almeda & Alvear,
Dolichoura kollmannii	R.Goldenb. & R. Tavares	Huberia kollmannii	(R.Goldenb. & R.Tav.) Bochorny & Michelang.	Dolichoura kollmannii R.Goldenb. & R. Tavares	Huberia kollmannii (R.Goldenb. & R.Tav.) Bochorny & Michelang.
Dolichoura spiritusanctensis	Brade	Huberia bradeana	Bochorny & R.Goldenb.	Dolichoura spiritusanctensis Brade	Huberia bradeana Bochorny & R.Goldenb.
Ernestia cordifolia	O. Berg ex Triana	Pseudoernestia cordifolia	(O.Berg ex Triana) Krasser	Ernestia cordifolia O. Berg ex Triana	Pseudoernestia cordifolia (O.Berg ex Triana) Krasser
Ernestia glandulosa	Gleason	Pseudoernestia glandulosa	(Gleason) M.J.R.Rocha & P.J.F.Guim.	Ernestia glandulosa Gleason	Pseudoernestia glandulosa (Gleason) M.J.R.Rocha & P.J.F.Guim.
Ernestia pullei	Gleason	Appendicularia pullei	(Gleason) M.J.R.Rocha & P.J.F.Guim	Ernestia pullei Gleason	Appendicularia pullei (Gleason) M.J.R.Rocha & P.J.F.Guim
Ernestia subglabra	Wurdack	Appendicularia subglabra	(Wurdack) M.J.R.Rocha & P.J.F.Guim.	Ernestia subglabra Wurdack	Appendicularia subglabra (Wurdack) M.J.R.Rocha & P.J.F.Guim.
Henriettea hotteana	(Urb. & Ekman) Alain	Miconia hotteana	(Urb. & Ekman) Judd & Ionta	Henriettea hotteana (Urb. & Ekman) Alain	Miconia hotteana (Urb. & Ekman) Judd & Ionta
Henriettea hotteana	(Urb. & Ekman) Alain	Miconia hotteana	(Urb. & Ekman) Judd & Ionta	Henriettea hotteana (Urb. & Ekman) Alain	Miconia hotteana (Urb. & Ekman) Judd & Ionta
Henriettella acunae	Alain	Henriettea acunae	(Alain) Alain	Henriettella acunae Alain	Henriettea acunae (Alain) Alain
Henriettella aggregata	(D.Don) Triana	Henriettea aggregata	(D.Don) J.F.Macbr.	Henriettella aggregata (D.Don) Triana	Henriettea aggregata (D.Don) J.F.Macbr.
Henriettella barkeri	Urb. & Ekman	Henriettea barkeri	(Urb. & Ekman) Alain	Henriettella barkeri Urb. & Ekman	Henriettea barkeri (Urb. & Ekman) Alain
Henriettella boliviensis	Cogn.	Henriettea boliviensis	(Cogn.) Penneys, Michelangeli, Judd & Almeda	Henriettella boliviensis Cogn.	Henriettea boliviensis (Cogn.) Penneys, Michelangeli, Judd & Almeda
Henriettella bracteosa	Wurdack	Henriettea bracteosa	(Wurdack) Penneys, Michelangeli, Judd & Almeda	Henriettella bracteosa Wurdack	Henriettea bracteosa (Wurdack) Penneys, Michelangeli, Judd & Almeda
Henriettella caudata	Gleason	Henriettea caudata	(Gleason) Penneys, Michelangeli, Judd & Almeda	Henriettella caudata Gleason	Henriettea caudata (Gleason) Penneys, Michelangeli, Judd & Almeda
Henriettella ciliata	Urb. & Ekman	Henriettea ciliata	(Urb. & Ekman) Alain	Henriettella ciliata Urb. & Ekman	Henriettea ciliata (Urb. & Ekman) Alain
Henriettella cuabae	(Urb.) Bisse	Henriettea cuabae	(Urb.) Borhidi	Henriettella cuabae (Urb.) Bisse	Henriettea cuabae (Urb.) Borhidi
Henriettella cuneata	(Standl.) Gleason	Henriettea cuneata	(Standl.) L.O.Williams	Henriettella cuneata (Standl.) Gleason	Henriettea cuneata (Standl.) L.O.Williams
Henriettella duckeana	Hoehne	Henriettea duckeana	(Hoehne) Penneys, Michelangeli, Judd & Almeda	Henriettella duckeana Hoehne	Henriettea duckeana (Hoehne) Penneys, Michelangeli, Judd & Almeda
Henriettella ekmanii	Urb.	Henriettea ekmanii	(Urb.) Alain	Henriettella ekmanii Urb.	Henriettea ekmanii (Urb.) Alain
Henriettella fascicularis	(Sw.) C.Wright	Henriettea fascicularis	(Sw.) M.Gómez	Henriettella fascicularis (Sw.) C.Wright	Henriettea fascicularis (Sw.) M.Gómez
Henriettella fissanthera	Gleason	Henriettea fissanthera	(Gleason) Penneys, Michelangeli, Judd & Almeda	Henriettella fissanthera Gleason	Henriettea fissanthera (Gleason) Penneys, Michelangeli, Judd & Almeda
Henriettella flavescens	(Aubl.) Triana	Henriettea flavescens	(Aubl.) Baill.	Henriettella flavescens (Aubl.) Triana	Henriettea flavescens (Aubl.) Baill.
Henriettella gibberosa	Urb.	Henriettea gibberosa	(Urb.) Alain	Henriettella gibberosa Urb.	Henriettea gibberosa (Urb.) Alain
Henriettella glabra	(Vell.) Cogn.	Henriettea glabra	(Vell.) Penneys, Michelangeli, Judd & Almeda	Henriettella glabra (Vell.) Cogn.	Henriettea glabra (Vell.) Penneys, Michelangeli, Judd & Almeda
Henriettella goudotiana	Naudin	Henriettea goudotiana	(Naudin) Penneys, Michelangeli, Judd & Almeda	Henriettella goudotiana Naudin	Henriettea goudotiana (Naudin) Penneys, Michelangeli, Judd & Almeda
Henriettella heteroneura	Gleason	Henriettea heteroneura	(Gleason) Penneys, Michelangeli, Judd & Almeda	Henriettella heteroneura Gleason	Henriettea heteroneura (Gleason) Penneys, Michelangeli, Judd & Almeda
Henriettella hondurensis	Wurdack	Henriettea hondurensis	(Wurdack) Penneys, Michelangeli, Judd & Almeda	Henriettella hondurensis Wurdack	Henriettea hondurensis (Wurdack) Penneys, Michelangeli, Judd & Almeda
Henriettella ininiensis	Wurdack	Henriettea ininiensis	(Wurdack) Penneys, Michelangeli, Judd & Almeda	Henriettella ininiensis Wurdack	Henriettea ininiensis (Wurdack) Penneys, Michelangeli, Judd & Almeda
Henriettella lateriflora	(Vahl) Triana	Henriettea lateriflora	(Vahl) R.A.Howard & E.A.Kellogg	Henriettella lateriflora (Vahl) Triana	Henriettea lateriflora (Vahl) R.A.Howard & E.A.Kellogg
Henriettella lawrencei	Gleason	Henriettea lawrancei	(Gleason) Penneys, Michelangeli, Judd & Almeda	Henriettella lawrencei Gleason	Henriettea lawrancei (Gleason) Penneys, Michelangeli, Judd & Almeda
Henriettella loretensis	Gleason	Henriettea loretensis	(Gleason) J.F.Macbr.	Henriettella loretensis Gleason	Henriettea loretensis (Gleason) J.F.Macbr.
Henriettella lundellii	Wurdack	Henriettea lundellii	(Wurdack) Penneys, Michelangeli, Judd & Almeda	Henriettella lundellii Wurdack	Henriettea lundellii (Wurdack) Penneys, Michelangeli, Judd & Almeda
Henriettella macfadyenii	Triana	Henriettea macfadyenii	(Triana) Alain	Henriettella macfadyenii Triana	Henriettea macfadyenii (Triana) Alain
Henriettella maguirei	Wurdack	Henriettea maguirei	(Wurdack) Penneys, Michelangeli, Judd & Almeda	Henriettella maguirei Wurdack	Henriettea maguirei (Wurdack) Penneys, Michelangeli, Judd & Almeda
Henriettella manarae	Wurdack	Henriettea manarae	(Wurdack) Penneys, Michelangeli, Judd & Almeda	Henriettella manarae Wurdack	Henriettea manarae (Wurdack) Penneys, Michelangeli, Judd & Almeda
Henriettella megaloclada	Urb. & Ekman	Henriettea megaloclada	(Urb. & Ekman) Alain	Henriettella megaloclada Urb. & Ekman	Henriettea megaloclada (Urb. & Ekman) Alain
Henriettella membranifolia	Cogn.	Henriettea membranifolia	(Cogn.) Alain	Henriettella membranifolia Cogn.	Henriettea membranifolia (Cogn.) Alain
Henriettella odorata	Markgr.	Henriettea odorata	(Markgr.) Penneys, Michelangeli, Judd & Almeda	Henriettella odorata Markgr.	Henriettea odorata (Markgr.) Penneys, Michelangeli, Judd & Almeda
Henriettella ovata	Cogn.	Henriettea ovata	(Cogn.) Penneys, Michelangeli, Judd & Almeda	Henriettella ovata Cogn.	Henriettea ovata (Cogn.) Penneys, Michelangeli, Judd & Almeda
Henriettella prancei	Wurdack	Henriettea prancei	(Wurdack) Penneys, Michelangeli, Judd & Almeda	Henriettella prancei Wurdack	Henriettea prancei (Wurdack) Penneys, Michelangeli, Judd & Almeda
Henriettella reflexa	Urb. & Ekman	Henriettea reflexa	(Urb. & Ekman) Alain	Henriettella reflexa Urb. & Ekman	Henriettea reflexa (Urb. & Ekman) Alain
Henriettella rimosa	Wurdack	Henriettea rimosa	(Wurdack) Penneys, Michelangeli, Judd & Almeda	Henriettella rimosa Wurdack	Henriettea rimosa (Wurdack) Penneys, Michelangeli, Judd & Almeda
Henriettella seemannii	Naudin	Henriettea seemannii	(Naudin) L.O.Williams	Henriettella seemannii Naudin	Henriettea seemannii (Naudin) L.O.Williams
Henriettella sessilifolia	(L.) Triana	Henriettea sessilifolia	(L.) Alain	Henriettella sessilifolia (L.) Triana	Henriettea sessilifolia (L.) Alain
Henriettella squamata	Alain	Henriettea squamata	(Alain) Alain	Henriettella squamata Alain	Henriettea squamata (Alain) Alain
Henriettella steyermarkii	Wurdack	Henriettea steyermarkii	(Wurdack) Penneys, Michelangeli, Judd & Almeda	Henriettella steyermarkii Wurdack	Henriettea steyermarkii (Wurdack) Penneys, Michelangeli, Judd & Almeda
Henriettella sylvestris	Gleason	Henriettea sylvestris	(Gleason) J.F.Macbr.	Henriettella sylvestris Gleason	Henriettea sylvestris (Gleason) J.F.Macbr.
Henriettella tachirensis	Wurdack	Henriettea tachirensis	(Wurdack) Penneys, Michelangeli, Judd & Almeda	Henriettella tachirensis Wurdack	Henriettea tachirensis (Wurdack) Penneys, Michelangeli, Judd & Almeda
Henriettella tobagensis	Wurdack	Henriettea tobagensis	(Wurdack) Penneys, Michelangeli, Judd & Almeda	Henriettella tobagensis Wurdack	Henriettea tobagensis (Wurdack) Penneys, Michelangeli, Judd & Almeda
Henriettella tovarensis	Cogn.	Henriettea tovarensis	(Wurdack) Penneys, Michelangeli, Judd & Almeda	Henriettella tovarensis Cogn.	Henriettea tovarensis (Wurdack) Penneys, Michelangeli, Judd & Almeda
Henriettella trachyphylla	Triana	Henriettea trachyphylla	(Triana) Penneys, Michelangeli, Judd & Almeda	Henriettella trachyphylla Triana	Henriettea trachyphylla (Triana) Penneys, Michelangeli, Judd & Almeda
Henriettella triflora	(Vahl) Triana	Henriettea triflora	(Vahl) Alain	Henriettella triflora (Vahl) Triana	Henriettea triflora (Vahl) Alain
Henriettella tuberculosa	Donn. Sm.	Henriettea tuberculosa	(Donn. Sm.) L.O.Williams	Henriettella tuberculosa Donn. Sm.	Henriettea tuberculosa (Donn. Sm.) L.O.Williams
Henriettella verrucosa	Triana	Henriettea verrucosa	(Triana) J.F.Macbr.	Henriettella verrucosa Triana	Henriettea verrucosa (Triana) J.F.Macbr.
Huilaea calyptrata	Penneys & Morales-P.	Chalybea calyptrata	(Penneys & Morales-P.) Penneys & Morales-P.,	Huilaea calyptrata Penneys & Morales-P.	Chalybea calyptrata (Penneys & Morales-P.) Penneys & Morales-P.,
Huilaea ecuadorensis	Wurdack	Chalybea ecuadorensis	(Wurdack) Morales-P. & Penneys	Huilaea ecuadorensis Wurdack	Chalybea ecuadorensis (Wurdack) Morales-P. & Penneys
Huilaea kirkbridei	Wurdack	Chalybea kirkbridei	(Wurdack) Morales-P. & Penneys	Huilaea kirkbridei Wurdack	Chalybea kirkbridei (Wurdack) Morales-P. & Penneys
Huilaea macrocarpa	L.Uribe	Chalybea macrocarpa	(L.Uribe) Morales-P. & Penneys	Huilaea macrocarpa L.Uribe	Chalybea macrocarpa (L.Uribe) Morales-P. & Penneys
Huilaea minor	(L.Uribe) Lozano & N.Ruiz-R.	Chalybea minor	(L.Uribe) Morales-P. & Penneys	Huilaea minor (L.Uribe) Lozano & N.Ruiz-R.	Chalybea minor (L.Uribe) Morales-P. & Penneys
Huilaea mutisiana	L.Uribe	Chalybea mutisiana	L.Uribe) Morales-P. & Penneys	Huilaea mutisiana L.Uribe	Chalybea mutisiana L.Uribe) Morales-P. & Penneys
Huilaea occidentalis	Lozano & N.Ruiz-R.	Chalybea occidentalis	Lozano & N.Ruiz-R) Morales-P. & Penneys.	Huilaea occidentalis Lozano & N.Ruiz-R.	Chalybea occidentalis Lozano & N.Ruiz-R) Morales-P. & Penneys.
Huilaea penduliflora	Wurdack	Chalybea penduliflora	Wurdack) Morales-P. & Penneys	Huilaea penduliflora Wurdack	Chalybea penduliflora Wurdack) Morales-P. & Penneys
Killipia latifolia	Wurdack	Miconia jamesluteynii	Michelang.	Killipia latifolia Wurdack	Miconia jamesluteynii Michelang.
Killipia pedunculata	Gleason	Miconia aurantipetala	Michelang.	Killipia pedunculata Gleason	Miconia aurantipetala Michelang.
Killipia quadrangularis	Gleason	Miconia quadricaulis	Michelang.	Killipia quadrangularis Gleason	Miconia quadricaulis Michelang.
Killipia rotundifolia	Wurdack	Miconia roseopetala	Michelang.	Killipia rotundifolia Wurdack	Miconia roseopetala Michelang.
Killipia verticalis	N.Ruiz-R.	Miconia verticalis	(N. Ruiz-R.) Michelang.	Killipia verticalis N.Ruiz-R.	Miconia verticalis (N. Ruiz-R.) Michelang.
Leandra acuminata	Cogn.	Miconia leacuminata	R.Goldenb.	Leandra acuminata Cogn.	Miconia leacuminata R.Goldenb.
Leandra acutiflora	(Naudin) Cogn.	Miconia acutiflora	(Naudin) R.Goldenb.	Leandra acutiflora (Naudin) Cogn.	Miconia acutiflora (Naudin) R.Goldenb.
Leandra adamantinensis	Brade	Miconia adamantinensis	(Brade) R.Goldenb.	Leandra adamantinensis Brade	Miconia adamantinensis (Brade) R.Goldenb.
Leandra adenothrix	Cogn.	Miconia adenothrix	(Cogn.) R.Goldenb.	Leandra adenothrix Cogn.	Miconia adenothrix (Cogn.) R.Goldenb.
Leandra agrestis	(Aubl.) Raddi	Miconia agrestis	(Aubl. ) Raddi	Leandra agrestis (Aubl.) Raddi	Miconia agrestis (Aubl. ) Raddi
Leandra alpestris	(Gardn.) Cogn.	Miconia lealpestris	R.Goldenb.	Leandra alpestris (Gardn.) Cogn.	Miconia lealpestris R.Goldenb.
Leandra altomacaensis	Baumgratz & D'El Rei Souza	Miconia altomacaensis	(Baumgratz & D'El Rei Souza) R.Goldenb.	Leandra altomacaensis Baumgratz & D'El Rei Souza	Miconia altomacaensis (Baumgratz & D'El Rei Souza) R.Goldenb.
Leandra amplexicaulis	DC.	Miconia pectinata	(Cogn.) R.Goldenb.	Leandra amplexicaulis DC.	Miconia pectinata (Cogn.) R.Goldenb.
Leandra aptera	(DC.) Cogn.	Miconia aptera	(DC.) R.Goldenb.	Leandra aptera (DC.) Cogn.	Miconia aptera (DC.) R.Goldenb.
Leandra aristigera	(Naudin) Cogn.	Miconia aristigera	(Naudin) R.Goldenb. & Michelang.	Leandra aristigera (Naudin) Cogn.	Miconia aristigera (Naudin) R.Goldenb. & Michelang.
Leandra aspera	Cogn.	Miconia aspera	(Cogn.) R.Goldenb.	Leandra aspera Cogn.	Miconia aspera (Cogn.) R.Goldenb.
Leandra atrata	Cogn.	Miconia leatrata	R.Goldenb.	Leandra atrata Cogn.	Miconia leatrata R.Goldenb.
Leandra atroviridis	Cogn.	Miconia atroviridis	(Cogn.) R.Goldenb.	Leandra atroviridis Cogn.	Miconia atroviridis (Cogn.) R.Goldenb.
Leandra aurea	(Cham.) Cogn.	Miconia auricoma	(Spring. ex Mart.) R.Goldenb.	Leandra aurea (Cham.) Cogn.	Miconia auricoma (Spring. ex Mart.) R.Goldenb.
Leandra australis	(Cham.) Cogn.	Miconia australis	(Cham.) R.Goldenb.	Leandra australis (Cham.) Cogn.	Miconia australis (Cham.) R.Goldenb.
Leandra balansaei	Cogn.	Miconia balansae	(Cogn.) R.Goldenb.	Leandra balansaei Cogn.	Miconia balansae (Cogn.) R.Goldenb.
Leandra barbinervis	(Cham. ex Triana) Cogn.	Miconia trauninensis	(Cogn.) R.Goldenb.	Leandra barbinervis (Cham. ex Triana) Cogn.	Miconia trauninensis (Cogn.) R.Goldenb.
Leandra blanchetiana	(Triana) Cogn.	Miconia leablanchetiana	R.Goldenb.	Leandra blanchetiana (Triana) Cogn.	Miconia leablanchetiana R.Goldenb.
Leandra boissieriana	Cogn.	Miconia pierreboissieriana	R.Goldenb.	Leandra boissieriana Cogn.	Miconia pierreboissieriana R.Goldenb.
Leandra boliviensis	Cogn.	Miconia yungasensis	R.Goldenb. & Michelang.	Leandra boliviensis Cogn.	Miconia yungasensis R.Goldenb. & Michelang.
Leandra brackenridgei	(A. Gray) Cogn.	Miconia brackenridgei	(A.Gray) R.Goldenb.	Leandra brackenridgei (A. Gray) Cogn.	Miconia brackenridgei (A.Gray) R.Goldenb.
Leandra breviflora	Cogn.	Miconia breviflora	(Cogn.) R.Goldenb.	Leandra breviflora Cogn.	Miconia breviflora (Cogn.) R.Goldenb.
Leandra calvescens	(O. Berg ex Triana) Cogn.	Miconia leacalvescens	R.Goldenb.	Leandra calvescens (O. Berg ex Triana) Cogn.	Miconia leacalvescens R.Goldenb.
Leandra camporum	Brade	Miconia camporum	(Brade) R.Goldenb.	Leandra camporum Brade	Miconia camporum (Brade) R.Goldenb.
Leandra cancellata	Cogn.	Miconia cancellata	(Cogn.) R.Goldenb.	Leandra cancellata Cogn.	Miconia cancellata (Cogn.) R.Goldenb.
Leandra candelabrum	(J.F.Macbr.) Wurdack	Miconia candelabrum	(J.F.Macbr.) R.Goldenb. & Michelang.	Leandra candelabrum (J.F.Macbr.) Wurdack	Miconia candelabrum (J.F.Macbr.) R.Goldenb. & Michelang.
Leandra capilliflora	(Naudin) Reginato	Miconia capilliflora	(Naudin) R.Goldenb.	Leandra capilliflora (Naudin) Reginato	Miconia capilliflora (Naudin) R.Goldenb.
Leandra capitata	Reginato	Miconia leacapitata	R.Goldenb.	Leandra capitata Reginato	Miconia leacapitata R.Goldenb.
Leandra caquetana	Sprague	Miconia secuncaquetana	G. Ocampo & Almeda	Leandra caquetana Sprague	Miconia secuncaquetana G. Ocampo & Almeda
Leandra caquetensis	Gleason	Miconia caquetensis	(Gleason) G. Ocampo & Almeda	Leandra caquetensis Gleason	Miconia caquetensis (Gleason) G. Ocampo & Almeda
Leandra carassana	(DC.) Cogn.	Miconia sublanata	(Cogn.) R.Goldenb.	Leandra carassana (DC.) Cogn.	Miconia sublanata (Cogn.) R.Goldenb.
Leandra catharinensis	Cogn.	Miconia catharinensis	(Cogn.) R.Goldenb.	Leandra catharinensis Cogn.	Miconia catharinensis (Cogn.) R.Goldenb.
Leandra chaetocalyx	(A.Gray) Cogn	Miconia chaetocalyx	(A.Gray) R.Goldenb.	Leandra chaetocalyx (A.Gray) Cogn	Miconia chaetocalyx (A.Gray) R.Goldenb.
Leandra chaetodon	(DC.) Cogn.	Miconia chaetodonta	R.Goldenb. & Michelang.	Leandra chaetodon (DC.) Cogn.	Miconia chaetodonta R.Goldenb. & Michelang.
Leandra cinerea	(Griseb.) Cogn.	Miconia cubacinerea	Majure & Judd	Leandra cinerea (Griseb.) Cogn.	Miconia cubacinerea Majure & Judd
Leandra circumscissa	Cogn.	Miconia circumscissa	(Cogn.) R.Goldenb.	Leandra circumscissa Cogn.	Miconia circumscissa (Cogn.) R.Goldenb.
Leandra clidemioides	(Naudin) Wurdack	Miconia stenopetala	Griseb.	Leandra clidemioides (Naudin) Wurdack	Miconia stenopetala Griseb.
Leandra coadunata	Wurdack	Miconia coadunata	(Wurdack) R.Goldenb.	Leandra coadunata Wurdack	Miconia coadunata (Wurdack) R.Goldenb.
Leandra cogniauxii	(D'El Rei Souza) Reginato	Miconia cogniauxii	(Glaz. Ex. Del Rei Souza) R.Goldenb.	Leandra cogniauxii (D'El Rei Souza) Reginato	Miconia cogniauxii (Glaz. Ex. Del Rei Souza) R.Goldenb.
Leandra collina	Wurdack	Miconia leacollina	R.Goldenb.	Leandra collina Wurdack	Miconia leacollina R.Goldenb.
Leandra confusa	Cogn.	Miconia leaconfusa	R.Goldenb.	Leandra confusa Cogn.	Miconia leaconfusa R.Goldenb.
Leandra cordifolia	(Naud.) Cogn.	Miconia leacordifolia	R.Goldenb.	Leandra cordifolia (Naud.) Cogn.	Miconia leacordifolia R.Goldenb.
Leandra cordigera	(Triana) Cogn.	Miconia cordigera	(Triana) R.Goldenb.	Leandra cordigera (Triana) Cogn.	Miconia cordigera (Triana) R.Goldenb.
Leandra coriacea	Cogn.	Miconia leacoriacea	R.Goldenb.	Leandra coriacea Cogn.	Miconia leacoriacea R.Goldenb.
Leandra cornoides	(Schltdl. & Cham.) Cogn.	Miconia cornoides	(Schltdl. & Cham.) Almeda	Leandra cornoides (Schltdl. & Cham.) Cogn.	Miconia cornoides (Schltdl. & Cham.) Almeda
Leandra cremersii	Wurdack	Miconia cremersii	(Wurdack) G. Ocampo & Almeda	Leandra cremersii Wurdack	Miconia cremersii (Wurdack) G. Ocampo & Almeda
Leandra crenata	(Pav. ex D.Don) Cogn.	Miconia leacrenata	R.Goldenb. & Michelang.	Leandra crenata (Pav. ex D.Don) Cogn.	Miconia leacrenata R.Goldenb. & Michelang.
Leandra cristata	Reginato & R.Goldenb.	Miconia cristata	(Reginato & R.Goldenb.) R.Goldenb.	Leandra cristata Reginato & R.Goldenb.	Miconia cristata (Reginato & R.Goldenb.) R.Goldenb.
Leandra cuatrecasasii	Wurdack	Miconia josecuatrecasasii	R.Goldenb. & Michelang.	Leandra cuatrecasasii Wurdack	Miconia josecuatrecasasii R.Goldenb. & Michelang.
Leandra cuneata	(Mart.) Cogn.	Miconia cuneatissima	R.Goldenb. & Michelang.	Leandra cuneata (Mart.) Cogn.	Miconia cuneatissima R.Goldenb. & Michelang.
Leandra debilis	(Naudin) Cogn.	Miconia leadebilis	R.Goldenb.	Leandra debilis (Naudin) Cogn.	Miconia leadebilis R.Goldenb.
Leandra deflexa	(O. Berg. ex Triana) Cogn.	Miconia deflexa	(Triana) R.Goldenb.	Leandra deflexa (O. Berg. ex Triana) Cogn.	Miconia deflexa (Triana) R.Goldenb.
Leandra dendroides	(Naudin) Cogn.	Miconia dendroides	(Naudin) R.Goldenb.	Leandra dendroides (Naudin) Cogn.	Miconia dendroides (Naudin) R.Goldenb.
Leandra dentata	Cogn.	Miconia leadentata	R.Goldenb.	Leandra dentata Cogn.	Miconia leadentata R.Goldenb.
Leandra dichotoma	(Pav. ex D.Don) Cogn.	Miconia sulcicaulis	(Poepp. ex Naudin) G. Ocampo & Almeda	Leandra dichotoma (Pav. ex D.Don) Cogn.	Miconia sulcicaulis (Poepp. ex Naudin) G. Ocampo & Almeda
Leandra diffusa	Cogn.	Miconia diffusa	(Cogn.) R.Goldenb.	Leandra diffusa Cogn.	Miconia diffusa (Cogn.) R.Goldenb.
Leandra dispar	(Gardner) Cogn.	Miconia leadispar	R.Goldenb.	Leandra dispar (Gardner) Cogn.	Miconia leadispar R.Goldenb.
Leandra divaricata	(Naudin) Cogn.	Miconia secundivaricata	G. Ocampo & Almeda	Leandra divaricata (Naudin) Cogn.	Miconia secundivaricata G. Ocampo & Almeda
Leandra dolichantha	(Naudin) Cogn.	Miconia dolichantha	(Naudin) R.Goldenb.	Leandra dolichantha (Naudin) Cogn.	Miconia dolichantha (Naudin) R.Goldenb.
Leandra dubia	DC.	Miconia dubia	(DC.) R.Goldenb.	Leandra dubia DC.	Miconia dubia (DC.) R.Goldenb.
Leandra echinata	Cogn.	Miconia leaechinata	R.Goldenb.	Leandra echinata Cogn.	Miconia leaechinata R.Goldenb.
Leandra edentula	Gleason	Miconia edentula	(Gleason) Michelang. & R.Goldenb.	Leandra edentula Gleason	Miconia edentula (Gleason) Michelang. & R.Goldenb.
Leandra eichleri	Cogn.	Miconia leaeichleri	Michelang. & R.Goldenb.	Leandra eichleri Cogn.	Miconia leaeichleri Michelang. & R.Goldenb.
Leandra eriocalyx	Cogn.	Miconia leaeriocalyx	R.Goldenb.	Leandra eriocalyx Cogn.	Miconia leaeriocalyx R.Goldenb.
Leandra erostrata	(DC.) Cogn.	Miconia erostrata	(DC.) R.Goldenb.	Leandra erostrata (DC.) Cogn.	Miconia erostrata (DC.) R.Goldenb.
Leandra fallacissima	Markgr.	Miconia fallacissima	(Markgr) R.Goldenb.	Leandra fallacissima Markgr.	Miconia fallacissima (Markgr) R.Goldenb.
Leandra fallax	(Cham.) Cogn.	Miconia leafallax	R.Goldenb.	Leandra fallax (Cham.) Cogn.	Miconia leafallax R.Goldenb.
Leandra fastigiata	Cogn.	Miconia fastigiata	(Cogn.) R.Goldenb.	Leandra fastigiata Cogn.	Miconia fastigiata (Cogn.) R.Goldenb.
Leandra flavescens	Cogn.	Miconia leaflavescens	R.Goldenb.	Leandra flavescens Cogn.	Miconia leaflavescens R.Goldenb.
Leandra floribunda	(Naudin) Cogn.	Miconia leafloribunda	R.Goldenb.	Leandra floribunda (Naudin) Cogn.	Miconia leafloribunda R.Goldenb.
Leandra fluminensis	Cogn.	Miconia leafluminensis	R.Goldenb.	Leandra fluminensis Cogn.	Miconia leafluminensis R.Goldenb.
Leandra fontanae	Reginato & R.Goldenb.	Miconia fontanae	(Reginato & R.Goldenb.) R.Goldenb.	Leandra fontanae Reginato & R.Goldenb.	Miconia fontanae (Reginato & R.Goldenb.) R.Goldenb.
Leandra foveolata	(DC.) Cogn.	Miconia leafoveolata	R.Goldenb.	Leandra foveolata (DC.) Cogn.	Miconia leafoveolata R.Goldenb.
Leandra francavillana	Cogn.	Miconia secunfrancavillana	G. Ocampo & Almeda	Leandra francavillana Cogn.	Miconia secunfrancavillana G. Ocampo & Almeda
Leandra freyreissii	Cogn.	Miconia freyreissii	(Cogn.) R.Goldenb.	Leandra freyreissii Cogn.	Miconia freyreissii (Cogn.) R.Goldenb.
Leandra glabrata	(Bunb.) Cogn.	Miconia dolichostachya	(Naudin) R.Goldenb.	Leandra glabrata (Bunb.) Cogn.	Miconia dolichostachya (Naudin) R.Goldenb.
Leandra glandulifera	(Triana) Cogn.	Miconia glanduliflora	R.Goldenb. & Michelang.	Leandra glandulifera (Triana) Cogn.	Miconia glanduliflora R.Goldenb. & Michelang.
Leandra glazioviana	Cogn.	Miconia pubistyla	(Wurdack) R.Goldenb.	Leandra glazioviana Cogn.	Miconia pubistyla (Wurdack) R.Goldenb.
Leandra gorzulae	Wurdack	Miconia gorzulae	(Wurdack) Michelang. & R.Goldenb.	Leandra gorzulae Wurdack	Miconia gorzulae (Wurdack) Michelang. & R.Goldenb.
Leandra gracilis	Cogn.	Miconia leagracilis	R.Goldenb.	Leandra gracilis Cogn.	Miconia leagracilis R.Goldenb.
Leandra granatensis	Gleason	Miconia granatensis	(Gleason) G. Ocampo & Almeda	Leandra granatensis Gleason	Miconia granatensis (Gleason) G. Ocampo & Almeda
Leandra grandifolia	Cogn.	Miconia secungrandifolia	G. Ocampo & Almeda	Leandra grandifolia Cogn.	Miconia secungrandifolia G. Ocampo & Almeda
Leandra grayana	Cogn.	Miconia leagrayana	R.Goldenb.	Leandra grayana Cogn.	Miconia leagrayana R.Goldenb.
Leandra gynoverrucosa	Reginato	Miconia gynoverrucosa	(Reginato) R.Goldenb.	Leandra gynoverrucosa Reginato	Miconia gynoverrucosa (Reginato) R.Goldenb.
Leandra hatschbachii	Brade	Miconia hatschbachii	(Brade) R.Goldenb.	Leandra hatschbachii Brade	Miconia hatschbachii (Brade) R.Goldenb.
Leandra herincquiana	Cogn.	Miconia herincquiana	(Cogn.) R.Goldenb.	Leandra herincquiana Cogn.	Miconia herincquiana (Cogn.) R.Goldenb.
Leandra hermogenesii	Baumgratz & D'El Rei Souza	Miconia hermogenesii	(Baumgratz & D'El Rei Souza) R.Goldenb.	Leandra hermogenesii Baumgratz & D'El Rei Souza	Miconia hermogenesii (Baumgratz & D'El Rei Souza) R.Goldenb.
Leandra heteroporata	Reginato	Miconia heteroporata	(Reginato) R.Goldenb.	Leandra heteroporata Reginato	Miconia heteroporata (Reginato) R.Goldenb.
Leandra hirtella	Cogn.	Miconia leahirtaella	R.Goldenb.	Leandra hirtella Cogn.	Miconia leahirtaella R.Goldenb.
Leandra horrida	Cogn.	Miconia horrida	(Cogn.) R.Goldenb.	Leandra horrida Cogn.	Miconia horrida (Cogn.) R.Goldenb.
Leandra humilis	(Cogn.) Wurdack	Miconia leahumilis	R.Goldenb.	Leandra humilis (Cogn.) Wurdack	Miconia leahumilis R.Goldenb.
Leandra hybophylla	(Urb.) Alain	Miconia hybophylla	(Urb.) Majure & Judd	Leandra hybophylla (Urb.) Alain	Miconia hybophylla (Urb.) Majure & Judd
Leandra inaequalifolia	(DC) Cogn.	Miconia inaequalis	R.Goldenb. & Michelang.	Leandra inaequalifolia (DC) Cogn.	Miconia inaequalis R.Goldenb. & Michelang.
Leandra inaequidens	(Urb. & Ekm.) Judd & Skean	Miconia inaequipetiolata	Majure & Judd	Leandra inaequidens (Urb. & Ekm.) Judd & Skean	Miconia inaequipetiolata Majure & Judd
Leandra intermedia	(DC) Cogn.	Miconia intermedia	(DC.) G. Ocampo & Almeda	Leandra intermedia (DC) Cogn.	Miconia intermedia (DC.) G. Ocampo & Almeda
Leandra ionopogon	(Mart.) Cogn.	Miconia ionopogon	(Mart.) R.Goldenb.	Leandra ionopogon (Mart.) Cogn.	Miconia ionopogon (Mart.) R.Goldenb.
Leandra itatiaiae	(Wawra) Cogn.	Miconia itatiaiae	(Wawra) R.Goldenb.	Leandra itatiaiae (Wawra) Cogn.	Miconia itatiaiae (Wawra) R.Goldenb.
Leandra kleinii	Brade	Miconia leakleinii	R.Goldenb.	Leandra kleinii Brade	Miconia leakleinii R.Goldenb.
Leandra krugiana	(Cogn.) Judd & Skean	Miconia krugiana	(Cogn.) Majure & Judd	Leandra krugiana (Cogn.) Judd & Skean	Miconia krugiana (Cogn.) Majure & Judd
Leandra krugii	(Cogn.) Judd & Skean	Miconia karlkrugii	Majure & Judd	Leandra krugii (Cogn.) Judd & Skean	Miconia karlkrugii Majure & Judd
Leandra lacunosa	Cogn.	Miconia lacunosa	(Cogn.) R.Goldenb.	Leandra lacunosa Cogn.	Miconia lacunosa (Cogn.) R.Goldenb.
Leandra laevigata	(Triana) Cogn.	Miconia ciliolata	(Cogn.) R.Goldenb.	Leandra laevigata (Triana) Cogn.	Miconia ciliolata (Cogn.) R.Goldenb.
Leandra lancifolia	Cogn.	Miconia lealancifolia	R.Goldenb.	Leandra lancifolia Cogn.	Miconia lealancifolia R.Goldenb.
Leandra lapae	D'El Rei Souza & Baumgratz	Miconia lapae	(D'El Rei Souza & Baumgratz) R.Goldenb.	Leandra lapae D'El Rei Souza & Baumgratz	Miconia lapae (D'El Rei Souza & Baumgratz) R.Goldenb.
Leandra lasiopetala	Cogn.	Miconia lasiopetala	(Cogn. ) Almeda	Leandra lasiopetala Cogn.	Miconia lasiopetala (Cogn. ) Almeda
Leandra lasiostachya	Cogn.	Miconia lasiostachya	(Cogn.) R.Goldenb.	Leandra lasiostachya Cogn.	Miconia lasiostachya (Cogn.) R.Goldenb.
Leandra lehmanni	Cogn.	Miconia friedrichlehmanni	R.Goldenb.	Leandra lehmanni Cogn.	Miconia friedrichlehmanni R.Goldenb.
Leandra lima	(Desr.) Judd & Skean	Miconia lima	(Desr.) M. Gómez	Leandra lima (Desr.) Judd & Skean	Miconia lima (Desr.) M. Gómez
Leandra limbata	Cogn.	Miconia limbata	(Cogn.) R.Goldenb.	Leandra limbata Cogn.	Miconia limbata (Cogn.) R.Goldenb.
Leandra limoides	(Urb.) Judd & Skean	Miconia limoides	(Urb.) Majure & Judd	Leandra limoides (Urb.) Judd & Skean	Miconia limoides (Urb.) Majure & Judd
Leandra lindeniana	(Naudin) Cogn.	Miconia lealindeniana	Michelang. & R.Goldenb.	Leandra lindeniana (Naudin) Cogn.	Miconia lealindeniana Michelang. & R.Goldenb.
Leandra loligomorpha	(R.Goldenb. & Reginato) Reginato	Miconia loligomorpha	(R.Goldenb. & Reginato) R.Goldenb.	Leandra loligomorpha (R.Goldenb. & Reginato) Reginato	Miconia loligomorpha (R.Goldenb. & Reginato) R.Goldenb.
Leandra longibarbis	(Schrank & Mart. ex DC.) Cogn.	Miconia longibarbis	(Schrank & Mart. ex DC.) R.Goldenb.	Leandra longibarbis (Schrank & Mart. ex DC.) Cogn.	Miconia longibarbis (Schrank & Mart. ex DC.) R.Goldenb.
Leandra longicoma	Cogn.	Miconia longicoma	(Cogn. ) G. Ocampo & Almeda	Leandra longicoma Cogn.	Miconia longicoma (Cogn. ) G. Ocampo & Almeda
Leandra longisepala	Wurdack	Miconia secunlongisepala	G. Ocampo & Almeda	Leandra longisepala Wurdack	Miconia secunlongisepala G. Ocampo & Almeda
Leandra luctatoris	Wurdack	Miconia luctatoris	(Wurdack) R.Goldenb.	Leandra luctatoris Wurdack	Miconia luctatoris (Wurdack) R.Goldenb.
Leandra lutea	Cogn.	Miconia lutea	(Cogn.) R.Goldenb.	Leandra lutea Cogn.	Miconia lutea (Cogn.) R.Goldenb.
Leandra macdanielii	Wurdack	Miconia secunmacdanielii	G. Ocampo & Almeda	Leandra macdanielii Wurdack	Miconia secunmacdanielii G. Ocampo & Almeda
Leandra macropora	(O. Berg. ex Triana) Cogn.	Miconia macropora	(Triana) R.Goldenb.	Leandra macropora (O. Berg. ex Triana) Cogn.	Miconia macropora (Triana) R.Goldenb.
Leandra magdalenensis	Brade	Miconia magdalenensis	(Brade) R.Goldenb.	Leandra magdalenensis Brade	Miconia magdalenensis (Brade) R.Goldenb.
Leandra magnipetala	R. Goldenb & E. Camargo	Miconia magnipetala	(R.Goldenb & E. Camargo) R.Goldenb.	Leandra magnipetala R. Goldenb & E. Camargo	Miconia magnipetala (R.Goldenb & E. Camargo) R.Goldenb.
Leandra maguirei	Wurdack	Miconia secunmaguirei	G. Ocampo & Almeda	Leandra maguirei Wurdack	Miconia secunmaguirei G. Ocampo & Almeda
Leandra marigotiana	(Urb. & Ekman) Alain	Miconia marigotiana	(Urb. & Ekm.) Majure & Judd	Leandra marigotiana (Urb. & Ekman) Alain	Miconia marigotiana (Urb. & Ekm.) Majure & Judd
Leandra markgrafii	Brade	Miconia leamarkgrafii	R.Goldenb.	Leandra markgrafii Brade	Miconia leamarkgrafii R.Goldenb.
Leandra mattosii	Baumgratz & D'El Rei Souza	Miconia mattosii	(Baumgratz & D'El Rei Souza) R.Goldenb.	Leandra mattosii Baumgratz & D'El Rei Souza	Miconia mattosii (Baumgratz & D'El Rei Souza) R.Goldenb.
Leandra melanodesma	(Naudin) Cogn.	Miconia melanodesma	(Naudin) Michelang. & R.Goldenb.	Leandra melanodesma (Naudin) Cogn.	Miconia melanodesma (Naudin) Michelang. & R.Goldenb.
Leandra melastomoides	Raddi	Miconia melastomoides	(Raddi) R.Goldenb.	Leandra melastomoides Raddi	Miconia melastomoides (Raddi) R.Goldenb.
Leandra mexicana	(Naudin) Cogn.	Miconia secunmexicana	G. Ocampo & Almeda	Leandra mexicana (Naudin) Cogn.	Miconia secunmexicana G. Ocampo & Almeda
Leandra miconiastrum	(Naudin) Cogn.	Miconia miconiastrum	(Naudin) R.Goldenb.	Leandra miconiastrum (Naudin) Cogn.	Miconia miconiastrum (Naudin) R.Goldenb.
Leandra micrantha	Wurdack	Miconia microflora	R.Goldenb. & Michelang.	Leandra micrantha Wurdack	Miconia microflora R.Goldenb. & Michelang.
Leandra micropetala	(Naudin) Cogn.	Miconia nanopetala	R.Goldenb. & Michelang.	Leandra micropetala (Naudin) Cogn.	Miconia nanopetala R.Goldenb. & Michelang.
Leandra microphylla	Cogn.	Miconia dusenii	(Cogn.) R.Goldenb.	Leandra microphylla Cogn.	Miconia dusenii (Cogn.) R.Goldenb.
Leandra mollis	Cogn.	Miconia leamollis	R.Goldenb.	Leandra mollis Cogn.	Miconia leamollis R.Goldenb.
Leandra mouraei	Cogn.	Miconia leamourae	R.Goldenb.	Leandra mouraei Cogn.	Miconia leamourae R.Goldenb.
Leandra multiplinervis	(Naudin) Cogn.	Miconia oocarpa	(A.Gray) R.Goldenb.	Leandra multiplinervis (Naudin) Cogn.	Miconia oocarpa (A.Gray) R.Goldenb.
Leandra multisetosa	Cogn.	Miconia multisetosa	(Cogn.) R.Goldenb.	Leandra multisetosa Cogn.	Miconia multisetosa (Cogn.) R.Goldenb.
Leandra nanayensis	Wurdack	Miconia nanayensis	(Wurdack) R.Goldenb. & Michelang.	Leandra nanayensis Wurdack	Miconia nanayensis (Wurdack) R.Goldenb. & Michelang.
Leandra navicularis	Brade	Miconia navicularis	(Brade) R.Goldenb.	Leandra navicularis Brade	Miconia navicularis (Brade) R.Goldenb.
Leandra neblinensis	Wurdack	Miconia secunneblinensis	G. Ocampo & Almeda	Leandra neblinensis Wurdack	Miconia secunneblinensis G. Ocampo & Almeda
Leandra neglecta	Brade	Miconia neglecta	(Brade) R.Goldenb.	Leandra neglecta Brade	Miconia neglecta (Brade) R.Goldenb.
Leandra nervosa	(Naudin) Cogn.	Miconia nervosissima	Michelang. & R.Goldenb.	Leandra nervosa (Naudin) Cogn.	Miconia nervosissima Michelang. & R.Goldenb.
Leandra neurotricha	Cogn.	Miconia leaneurotricha	R.Goldenb.	Leandra neurotricha Cogn.	Miconia leaneurotricha R.Goldenb.
Leandra nianga	(DC) Cogn.	Miconia nianga	(DC.) R.Goldenb.	Leandra nianga (DC) Cogn.	Miconia nianga (DC.) R.Goldenb.
Leandra niangaeformis	Cogn.	Miconia niangaeformis	(Cogn.) R.Goldenb.	Leandra niangaeformis Cogn.	Miconia niangaeformis (Cogn.) R.Goldenb.
Leandra niederleinii	Cogn.	Miconia niederleinii	(Cogn.) R.Goldenb.	Leandra niederleinii Cogn.	Miconia niederleinii (Cogn.) R.Goldenb.
Leandra oblongifolia	Cogn.	Miconia leaoblongifolia	R.Goldenb.	Leandra oblongifolia Cogn.	Miconia leaoblongifolia R.Goldenb.
Leandra oligochaeta	Cogn.	Miconia oligochaeta	(Cham.) R.Goldenb.	Leandra oligochaeta Cogn.	Miconia oligochaeta (Cham.) R.Goldenb.
Leandra opaca	Brade	Miconia opaca	(Brade) R.Goldenb.	Leandra opaca Brade	Miconia opaca (Brade) R.Goldenb.
Leandra organensis	Cogn.	Miconia leaorganensis	R.Goldenb.	Leandra organensis Cogn.	Miconia leaorganensis R.Goldenb.
Leandra ossaeoides	(Naudin) Cogn.	Miconia ossaeoides	(Naudin) Michelang. & Tiernan	Leandra ossaeoides (Naudin) Cogn.	Miconia ossaeoides (Naudin) Michelang. & Tiernan
Leandra ovata	Cogn.	Miconia leaovata	R.Goldenb.	Leandra ovata Cogn.	Miconia leaovata R.Goldenb.
Leandra paleacea	Wurdack	Miconia paleaciramis	Michelang. & R.Goldenb.	Leandra paleacea Wurdack	Miconia paleaciramis Michelang. & R.Goldenb.
Leandra pallida	Cogn.	Miconia leapallida	R.Goldenb.	Leandra pallida Cogn.	Miconia leapallida R.Goldenb.
Leandra papillata	Cogn.	Miconia papillata	(Cogn.) R.Goldenb.	Leandra papillata Cogn.	Miconia papillata (Cogn.) R.Goldenb.
Leandra pastazana	Wurdack	Miconia secunpastazana	G. Ocampo & Almeda	Leandra pastazana Wurdack	Miconia secunpastazana G. Ocampo & Almeda
Leandra paulina	DC.	Miconia paulina	(DC.) R.Goldenb.	Leandra paulina DC.	Miconia paulina (DC.) R.Goldenb.
Leandra pectinata	Cogn.	Miconia pectinata	(Cogn.) R.Goldenb.	Leandra pectinata Cogn.	Miconia pectinata (Cogn.) R.Goldenb.
Leandra peltata	Wurdack	Miconia peltifolia	R.Goldenb. & Michelang.	Leandra peltata Wurdack	Miconia peltifolia R.Goldenb. & Michelang.
Leandra penduliflora	(Naudin) Cogn.	Miconia dolichodons	(Cogn.) R.Goldenb.	Leandra penduliflora (Naudin) Cogn.	Miconia dolichodons (Cogn.) R.Goldenb.
Leandra pennipilis	(O. Berg. ex Triana) Cogn.	Miconia leapennipilis	R.Goldenb.	Leandra pennipilis (O. Berg. ex Triana) Cogn.	Miconia leapennipilis R.Goldenb.
Leandra phelpsiae	Gleason	Miconia phelpsiae	(Gleason) R.Goldenb. & Michelang.	Leandra phelpsiae Gleason	Miconia phelpsiae (Gleason) R.Goldenb. & Michelang.
Leandra pilonensis	Wurdack	Miconia pilonensis	(Wurdack) R.Goldenb.	Leandra pilonensis Wurdack	Miconia pilonensis (Wurdack) R.Goldenb.
Leandra pilosissima	Cogn.	Miconia pilosissima	(Cogn.) R.Goldenb.	Leandra pilosissima Cogn.	Miconia pilosissima (Cogn.) R.Goldenb.
Leandra planifilamentosa	Brade	Miconia planifilamentosa	(Brade) R.Goldenb.	Leandra planifilamentosa Brade	Miconia planifilamentosa (Brade) R.Goldenb.
Leandra polyadena	Ule	Miconia polyadena	(Ule) R.Goldenb. & Michelang.	Leandra polyadena Ule	Miconia polyadena (Ule) R.Goldenb. & Michelang.
Leandra polychaeta	(Urb. & Ekm.) Alain	Miconia pedunculata	Majure & Judd	Leandra polychaeta (Urb. & Ekm.) Alain	Miconia pedunculata Majure & Judd
Leandra polychaeta	Cogn.	Miconia leapolychaeta	R.Goldenb.	Leandra polychaeta Cogn.	Miconia leapolychaeta R.Goldenb.
Leandra polystachya	(Naudin) Cogn.	Miconia polystachya	(Naudin) R.Goldenb.	Leandra polystachya (Naudin) Cogn.	Miconia polystachya (Naudin) R.Goldenb.
Leandra procumbens	Ule	Miconia chimantensis	(Wurdack) Michelang.	Leandra procumbens Ule	Miconia chimantensis (Wurdack) Michelang.
Leandra purpurascens	(DC.) Cogn.	Miconia microstachya	(Naudin) R.Goldenb.	Leandra purpurascens (DC.) Cogn.	Miconia microstachya (Naudin) R.Goldenb.
Leandra purpurea	Gleason	Miconia purpuriflora	Michelang. & R.Goldenb.	Leandra purpurea Gleason	Miconia purpuriflora Michelang. & R.Goldenb.
Leandra purpureo-villosa	Hoehne	Miconia purpureovillosa	(Hoehne) R.Goldenb.	Leandra purpureo-villosa Hoehne	Miconia purpureovillosa (Hoehne) R.Goldenb.
Leandra quinquedentata	(DC.) Cogn.	Miconia quinquedentata	(DC.) R.Goldenb.	Leandra quinquedentata (DC.) Cogn.	Miconia quinquedentata (DC.) R.Goldenb.
Leandra quinquenodis	(DC) Cogn.	Miconia quinquenodis	(DC.) R.Goldenb.	Leandra quinquenodis (DC) Cogn.	Miconia quinquenodis (DC.) R.Goldenb.
Leandra raimondiana	Markgr.	Miconia raimondiana	(Markgr.) R.Goldenb. & Michelang.	Leandra raimondiana Markgr.	Miconia raimondiana (Markgr.) R.Goldenb. & Michelang.
Leandra ramboi	Brade	Miconia learamboi	R.Goldenb.	Leandra ramboi Brade	Miconia learamboi R.Goldenb.
Leandra refracta	Cogn.	Miconia refracta	(Cogn.) R.Goldenb.	Leandra refracta Cogn.	Miconia refracta (Cogn.) R.Goldenb.
Leandra regnellii	(Triana) Cogn.	Miconia alterninervia	(Cogn.) R.Goldenb.	Leandra regnellii (Triana) Cogn.	Miconia alterninervia (Cogn.) R.Goldenb.
Leandra reitzii	Wurdack	Miconia reitzii	(Wurdack) R.Goldenb.	Leandra reitzii Wurdack	Miconia reitzii (Wurdack) R.Goldenb.
Leandra reptans	R.Goldenb. & Reginato	Miconia reptans	(R.Goldenb. & Reginato) R.Goldenb.	Leandra reptans R.Goldenb. & Reginato	Miconia reptans (R.Goldenb. & Reginato) R.Goldenb.
Leandra retropila	Cogn.	Miconia secunretropila	G. Ocampo & Almeda	Leandra retropila Cogn.	Miconia secunretropila G. Ocampo & Almeda
Leandra reversa	(DC.) Cogn.	Miconia reversa	(DC.) G. Ocampo & Almeda	Leandra reversa (DC.) Cogn.	Miconia reversa (DC.) G. Ocampo & Almeda
Leandra rhamnifolia	(Naudin) Cogn.	Miconia rhamnifolia	(Naudin) G. Ocampo & Almeda	Leandra rhamnifolia (Naudin) Cogn.	Miconia rhamnifolia (Naudin) G. Ocampo & Almeda
Leandra rhodopogon	(DC.) Cogn.	Miconia rhodopogon	(DC.) R.Goldenb.	Leandra rhodopogon (DC.) Cogn.	Miconia rhodopogon (DC.) R.Goldenb.
Leandra ribesiaeflora	(Cham.) Cogn.	Miconia ribesiiflora	(DC.) R.Goldenb.	Leandra ribesiaeflora (Cham.) Cogn.	Miconia ribesiiflora (DC.) R.Goldenb.
Leandra riedeliana	(O. Berg. ex Triana) Cogn.	Miconia leariedeliana	R.Goldenb.	Leandra riedeliana (O. Berg. ex Triana) Cogn.	Miconia leariedeliana R.Goldenb.
Leandra rigida	Cogn.	Miconia learigida	R.Goldenb.	Leandra rigida Cogn.	Miconia learigida R.Goldenb.
Leandra riograndensis	(Brade) Wurdack	Miconia riograndensis	(Brade) R.Goldenb.	Leandra riograndensis (Brade) Wurdack	Miconia riograndensis (Brade) R.Goldenb.
Leandra rotundifolia	J.F.Macbr.	Miconia secunrotundifolia	G. Ocampo & Almeda	Leandra rotundifolia J.F.Macbr.	Miconia secunrotundifolia G. Ocampo & Almeda
Leandra rubida	Cogn.	Miconia rubida	(Cogn.) R.Goldenb.	Leandra rubida Cogn.	Miconia rubida (Cogn.) R.Goldenb.
Leandra rufescens	(DC.) Cogn.	Miconia asperiuscula	(Rich. ex DC.) R.Goldenb.	Leandra rufescens (DC.) Cogn.	Miconia asperiuscula (Rich. ex DC.) R.Goldenb.
Leandra sabiaensis	Brade	Miconia sabiaensis	(Brade) R.Goldenb.	Leandra sabiaensis Brade	Miconia sabiaensis (Brade) R.Goldenb.
Leandra saldanhaei	Cogn.	Miconia leasaldanhae	R.Goldenb.	Leandra saldanhaei Cogn.	Miconia leasaldanhae R.Goldenb.
Leandra salicina	(Ser. ex DC.) Cogn.	Miconia salicina	(Ser. Ex DC.) Mabb.	Leandra salicina (Ser. ex DC.) Cogn.	Miconia salicina (Ser. Ex DC.) Mabb.
Leandra sanguinea	Gleason	Miconia secunsanguinea	G. Ocampo & Almeda	Leandra sanguinea Gleason	Miconia secunsanguinea G. Ocampo & Almeda
Leandra santos-limae	Brade	Miconia santoslimae	(Brade) R.Goldenb.	Leandra santos-limae Brade	Miconia santoslimae (Brade) R.Goldenb.
Leandra secunda	(D.Don) Cogn.	Miconia neosecunda	G. Ocampo & Almeda	Leandra secunda (D.Don) Cogn.	Miconia neosecunda G. Ocampo & Almeda
Leandra secundiflora	(DC.) Cogn.	Miconia neosecundiflora	G. Ocampo & Almeda	Leandra secundiflora (DC.) Cogn.	Miconia neosecundiflora G. Ocampo & Almeda
Leandra sericea	DC.	Miconia raddii	R.Goldenb.	Leandra sericea DC.	Miconia raddii R.Goldenb.
Leandra simplicicaulis	(Naudin) Cogn.	Miconia simplicicaulis	(Naudin) R.Goldenb.	Leandra simplicicaulis (Naudin) Cogn.	Miconia simplicicaulis (Naudin) R.Goldenb.
Leandra solenifera	Cogn.	Miconia solenifera	(Cogn. ) G. Ocampo & Almeda	Leandra solenifera Cogn.	Miconia solenifera (Cogn. ) G. Ocampo & Almeda
Leandra sparsisetulosa	Hoehne	Miconia sparsisetulosa	(Hoehne) R.Goldenb.	Leandra sparsisetulosa Hoehne	Miconia sparsisetulosa (Hoehne) R.Goldenb.
Leandra sphaerocarpa	Cogn.	Miconia sphaerocarpa	(Cogn.) R.Goldenb.	Leandra sphaerocarpa Cogn.	Miconia sphaerocarpa (Cogn.) R.Goldenb.
Leandra stellulata	Cogn.	Miconia stellulitricha	R.Goldenb. & Michelang.	Leandra stellulata Cogn.	Miconia stellulitricha R.Goldenb. & Michelang.
Leandra steyermarkii	Wurdack	Miconia juliansteyermarkii	R.Goldenb. & Michelang.	Leandra steyermarkii Wurdack	Miconia juliansteyermarkii R.Goldenb. & Michelang.
Leandra strigilliflora	(Naudin) Cogn.	Miconia strigilliflora	(Naudin) R.Goldenb.	Leandra strigilliflora (Naudin) Cogn.	Miconia strigilliflora (Naudin) R.Goldenb.
Leandra subobruta	Wurdack	Miconia subobruta	(Wurdack) R.Goldenb. & Michelang.	Leandra subobruta Wurdack	Miconia subobruta (Wurdack) R.Goldenb. & Michelang.
Leandra subseriata	(Naudin) Cogn.	Miconia subseriata	(Naudin) R.Goldenb. & Michelang.	Leandra subseriata (Naudin) Cogn.	Miconia subseriata (Naudin) R.Goldenb. & Michelang.
Leandra subtrinervis	Cogn.	Miconia subtrinervis	(Cogn.) R.Goldenb.	Leandra subtrinervis Cogn.	Miconia subtrinervis (Cogn.) R.Goldenb.
Leandra subulata	Gleason	Miconia subulata	(Gleason) R.Goldenb. & Michelang.	Leandra subulata Gleason	Miconia subulata (Gleason) R.Goldenb. & Michelang.
Leandra sulfurea	(Naudin) Cogn.	Miconia sulfurea	(Naudin) R.Goldenb.	Leandra sulfurea (Naudin) Cogn.	Miconia sulfurea (Naudin) R.Goldenb.
Leandra sylvatica	Cogn.	Miconia leasylvatica	R.Goldenb.	Leandra sylvatica Cogn.	Miconia leasylvatica R.Goldenb.
Leandra ternata	Cogn.	Miconia ternata	(Cogn.) R.Goldenb.	Leandra ternata Cogn.	Miconia ternata (Cogn.) R.Goldenb.
Leandra tetragona	Cogn.	Miconia leatetragona	R.Goldenb.	Leandra tetragona Cogn.	Miconia leatetragona R.Goldenb.
Leandra tetraptera	Cogn.	Miconia leatetraptera	R.Goldenb.	Leandra tetraptera Cogn.	Miconia leatetraptera R.Goldenb.
Leandra tetraquetra	(Cham.) Cogn.	Miconia tetraquetra	(Cham.) R.Goldenb.	Leandra tetraquetra (Cham.) Cogn.	Miconia tetraquetra (Cham.) R.Goldenb.
Leandra therezopolitana	Cogn.	Miconia therezopolitana	(Cogn.) R.Goldenb.	Leandra therezopolitana Cogn.	Miconia therezopolitana (Cogn.) R.Goldenb.
Leandra thyrsiflora	Markgr. ex Pilg.	Miconia leathyrsiflora	R.Goldenb.	Leandra thyrsiflora Markgr. ex Pilg.	Miconia leathyrsiflora R.Goldenb.
Leandra tomentosa	Cogn.	Miconia leatomentosa	R.Goldenb.	Leandra tomentosa Cogn.	Miconia leatomentosa R.Goldenb.
Leandra triantha	R. Goldenb & E. Camargo	Miconia triantha	(R.Goldenb. & E.Camargo) R.Goldenb.	Leandra triantha R. Goldenb & E. Camargo	Miconia triantha (R.Goldenb. & E.Camargo) R.Goldenb.
Leandra tristis	Cogn.	Miconia leatristis	R.Goldenb.	Leandra tristis Cogn.	Miconia leatristis R.Goldenb.
Leandra truncata	Baumgratz & D'El Rei Souza	Miconia leatruncata	R.Goldenb.	Leandra truncata Baumgratz & D'El Rei Souza	Miconia leatruncata R.Goldenb.
Leandra ulaei	Cogn.	Miconia ulei	(Cogn.) R.Goldenb.	Leandra ulaei Cogn.	Miconia ulei (Cogn.) R.Goldenb.
Leandra uliginosa	Brade	Miconia uliginosa	(Brade) R.Goldenb.	Leandra uliginosa Brade	Miconia uliginosa (Brade) R.Goldenb.
Leandra umbellata	DC.	Miconia leaumbellata	R.Goldenb.	Leandra umbellata DC.	Miconia leaumbellata R.Goldenb.
Leandra variabilis	Raddi	Miconia dasytricha	(A.Gray) R.Goldenb.	Leandra variabilis Raddi	Miconia dasytricha (A.Gray) R.Goldenb.
Leandra velutina	(Gardn.) Cogn.	Miconia leavelutina	R.Goldenb.	Leandra velutina (Gardn.) Cogn.	Miconia leavelutina R.Goldenb.
Leandra verticillata	(DC.) Cogn.	Miconia verticillifolia	Michelang. & R.Goldenb.	Leandra verticillata (DC.) Cogn.	Miconia verticillifolia Michelang. & R.Goldenb.
Leandra vesiculosa	Cogn.	Miconia vesiculosa	(Cogn.) R.Goldenb.	Leandra vesiculosa Cogn.	Miconia vesiculosa (Cogn.) R.Goldenb.
Leandra viridiflava	Brade	Miconia viridiflava	(Brade) R.Goldenb.	Leandra viridiflava Brade	Miconia viridiflava (Brade) R.Goldenb.
Leandra viscosa	Cogn.	Miconia viscosa	(Cogn.) R.Goldenb.	Leandra viscosa Cogn.	Miconia viscosa (Cogn.) R.Goldenb.
Leandra warmingiana	Cogn.	Miconia leawarmingiana	R.Goldenb.	Leandra warmingiana Cogn.	Miconia leawarmingiana R.Goldenb.
Leandra xanthocoma	(Naudin) Cogn.	Miconia xanthocoma	(Naudin) R.Goldenb.	Leandra xanthocoma (Naudin) Cogn.	Miconia xanthocoma (Naudin) R.Goldenb.
Leandra xantholasia	(DC.) Cogn.	Miconia xantholasia	(DC.) R.Goldenb.	Leandra xantholasia (DC.) Cogn.	Miconia xantholasia (DC.) R.Goldenb.
Leandra xanthopogon	(Naudin) Cogn.	Miconia xanthopogon	(Naudin) R.Goldenb.	Leandra xanthopogon (Naudin) Cogn.	Miconia xanthopogon (Naudin) R.Goldenb.
Leandra xanthostachya	Cogn.	Miconia xanthostachya	(Cogn.) R.Goldenb.	Leandra xanthostachya Cogn.	Miconia xanthostachya (Cogn.) R.Goldenb.
Llewelynia wiliamsii	Pittier	Henriettea williamsii	(Pittier) Penneys, Michelangeli, Judd & Almeda	Llewelynia wiliamsii Pittier	Henriettea williamsii (Pittier) Penneys, Michelangeli, Judd & Almeda
Loreya arborescens	(Aubl.) DC.	Bellucia arborescens	(Aubl.) Baill.	Loreya arborescens (Aubl.) DC.	Bellucia arborescens (Aubl.) Baill.
Loreya gracilis	S.S.Renner	Bellucia gracilis	(Renner) Penneys, Michelangeli, Judd & Almeda	Loreya gracilis S.S.Renner	Bellucia gracilis (Renner) Penneys, Michelangeli, Judd & Almeda
Loreya huberi	Wurdack	Bellucia huberi	(Wurdack) S.S.Renner	Loreya huberi Wurdack	Bellucia huberi (Wurdack) S.S.Renner
Loreya klugii	S.S.Renner	Bellucia klugii	(Renner) Penneys, Michelangeli, Judd & Almeda	Loreya klugii S.S.Renner	Bellucia klugii (Renner) Penneys, Michelangeli, Judd & Almeda
Loreya mespiloides	Miq.	Bellucia mespiloides	(Miq.) J.F.Macbr.	Loreya mespiloides Miq.	Bellucia mespiloides (Miq.) J.F.Macbr.
Loreya mucronata	Gleason	Henriettea mucronata	(Gleason) S.S.Renner	Loreya mucronata Gleason	Henriettea mucronata (Gleason) S.S.Renner
Loreya nigricans	(Hook. f.) Triana	Bellucia nigricans	(Hook. f.) Penneys, Michelangeli, Judd & Almeda	Loreya nigricans (Hook. f.) Triana	Bellucia nigricans (Hook. f.) Penneys, Michelangeli, Judd & Almeda
Loreya ovata	O.Berg ex Triana	Bellucia ovata	(O. Berg. ex Triana) Penneys, Michelangeli, Judd & Almeda	Loreya ovata O.Berg ex Triana	Bellucia ovata (O. Berg. ex Triana) Penneys, Michelangeli, Judd & Almeda
Loreya riparia	S.S.Renner	Bellucia riparia	(Renner) Penneys, Michelangeli, Judd & Almeda	Loreya riparia S.S.Renner	Bellucia riparia (Renner) Penneys, Michelangeli, Judd & Almeda
Loreya spruceana	Benth. ex Triana	Bellucia spruceana	(Benth. ex Triana) J.F.Macbr.	Loreya spruceana Benth. ex Triana	Bellucia spruceana (Benth. ex Triana) J.F.Macbr.
Loreya strigosa	Gleason	Bellucia strigosa	(Gleason) Penneys, Michelangeli, Judd & Almeda	Loreya strigosa Gleason	Bellucia strigosa (Gleason) Penneys, Michelangeli, Judd & Almeda
Loreya subandina	Wurdack	Bellucia subandina	(Wurdack) Penneys, Michelangeli, Judd & Almeda	Loreya subandina Wurdack	Bellucia subandina (Wurdack) Penneys, Michelangeli, Judd & Almeda
Loreya subrotundifolia	(Wurdack) S.S.Renner	Bellucia subrotundifolia	Wurdack	Loreya subrotundifolia (Wurdack) S.S.Renner	Bellucia subrotundifolia Wurdack
Loreya umbellata	(Gleason) Wurdack	Bellucia umbellata	Gleason	Loreya umbellata (Gleason) Wurdack	Bellucia umbellata Gleason
Loreya wurdackiana	S.S.Renner	Bellucia wurdackiana	(Renner) Penneys, Michelangeli, Judd & Almeda	Loreya wurdackiana S.S.Renner	Bellucia wurdackiana (Renner) Penneys, Michelangeli, Judd & Almeda
Maieta guianensis	Aubl.	Miconia mayeta	(D. Don) Michelang.	Maieta guianensis Aubl.	Miconia mayeta (D. Don) Michelang.
Maieta neblinensis	Wurdack	Miconia alatiflora	Michelang.	Maieta neblinensis Wurdack	Miconia alatiflora Michelang.
Maieta poeppigii	Mart. ex Cogn.	Miconia alternidomatia	Michelang.	Maieta poeppigii Mart. ex Cogn.	Miconia alternidomatia Michelang.
Mecranium acuminatum	(DC.) Skean	Miconia acuminoides	Skean, Judd & Majure	Mecranium acuminatum (DC.) Skean	Miconia acuminoides Skean, Judd & Majure
Mecranium alpestre	Urb. & Ekman	Miconia rufoalpestris	Skean, Judd & Majure	Mecranium alpestre Urb. & Ekman	Miconia rufoalpestris Skean, Judd & Majure
Mecranium amygdalinum	(Desr.) C.Wright	Miconia neoamygdalina	Skean, Judd & Majure	Mecranium amygdalinum (Desr.) C.Wright	Miconia neoamygdalina Skean, Judd & Majure
Mecranium axillare	(Macfadyen) Skean	Miconia axillaris	(Macfad.) Skean, Judd & Majure	Mecranium axillare (Macfadyen) Skean	Miconia axillaris (Macfad.) Skean, Judd & Majure
Mecranium axillare	subsp. proctorii Skean	Miconia Miconia	axillare subsp. proctori (Skean) Skean	Mecranium axillare subsp. proctorii Skean	Miconia Miconia axillare subsp. proctori (Skean) Skean
Mecranium axillare	subsp. urbanianum (Cogn.) Skean	Miconia Miconia	axillaris subsp. urbaniana (Skean) Skean	Mecranium axillare subsp. urbanianum (Cogn.) Skean	Miconia Miconia axillaris subsp. urbaniana (Skean) Skean
Mecranium birimosum	(Naudin) Triana	Miconia birrimosa	(naudin) Skean, Judd & Majure	Mecranium birimosum (Naudin) Triana	Miconia birrimosa (naudin) Skean, Judd & Majure
Mecranium crassinerve	(Urb.) Skean	Miconia crassinervis	(Urb.) Skean, Judd & Majure	Mecranium crassinerve (Urb.) Skean	Miconia crassinervis (Urb.) Skean, Judd & Majure
Mecranium haemanthum	Triana ex Cogn.	Miconia haemantha	(Triana ex Cogn.) Skean, Judd & Majure	Mecranium haemanthum Triana ex Cogn.	Miconia haemantha (Triana ex Cogn.) Skean, Judd & Majure
Mecranium haitiense	Urb.	Miconia ayisyena	Skean, Judd & Majure	Mecranium haitiense Urb.	Miconia ayisyena Skean, Judd & Majure
Mecranium integrifolium	(Naudin) Triana	Miconia antillana	Skean, Judd & Majure	Mecranium integrifolium (Naudin) Triana	Miconia antillana Skean, Judd & Majure
Mecranium integrifolium	subsp. alainii Skean	Miconia Miconia	antillana subsp. alainii (Skean) Skean, Judd & Majure	Mecranium integrifolium subsp. alainii Skean	Miconia Miconia antillana subsp. alainii (Skean) Skean, Judd & Majure
Mecranium integrifolium	subsp. neibense (Skean) Skean	Miconia Miconia	antillana subsp. neibensis (Skean) Skean, Judd & Majure	Mecranium integrifolium subsp. neibense (Skean) Skean	Miconia Miconia antillana subsp. neibensis (Skean) Skean, Judd & Majure
Mecranium juddii	Skean	Miconia juddii	(Skean) Skean, Judd & Majure	Mecranium juddii Skean	Miconia juddii (Skean) Skean, Judd & Majure
Mecranium latifolium	(Cogn.) Skean	Miconia borinquensis	Skean, Judd & Majure	Mecranium latifolium (Cogn.) Skean	Miconia borinquensis Skean, Judd & Majure
Mecranium microdictyum	Urb. & Ekman	Miconia microdicta	(Urb. & Ekman) Skean, Judd & Majure	Mecranium microdictyum Urb. & Ekman	Miconia microdicta (Urb. & Ekman) Skean, Judd & Majure
Mecranium multiflorum	(Desr.) Triana	Miconia polyflora	Skean, Judd & Majure	Mecranium multiflorum (Desr.) Triana	Miconia polyflora Skean, Judd & Majure
Mecranium obtusifolium	Cogn.	Miconia obtusifolia	(Cogn.) Skean, Judd & Majure	Mecranium obtusifolium Cogn.	Miconia obtusifolia (Cogn.) Skean, Judd & Majure
Mecranium ovatum	Cogn.	Miconia bahorucensis	Skean, Judd & Majure	Mecranium ovatum Cogn.	Miconia bahorucensis Skean, Judd & Majure
Mecranium plicatum	Urb.	Miconia plicatifolia	Skean, Judd & Majure	Mecranium plicatum Urb.	Miconia plicatifolia Skean, Judd & Majure
Mecranium puberulum	Cogn.	Miconia hirticaulis	Skean, Judd & Majure	Mecranium puberulum Cogn.	Miconia hirticaulis Skean, Judd & Majure
Mecranium purpurascens	(DC.) Triana	Miconia ossaeiformis	Naudin	Mecranium purpurascens (DC.) Triana	Miconia ossaeiformis Naudin
Mecranium racemosum	(Griseb.) C.Wright	Miconia conica	Skean, Judd & Majure	Mecranium racemosum (Griseb.) C.Wright	Miconia conica Skean, Judd & Majure
Mecranium revolutum	Skean & Judd	Miconia revolutifolia	Skean, Judd & Majure	Mecranium revolutum Skean & Judd	Miconia revolutifolia Skean, Judd & Majure
Mecranium septentrionale	Skean	Miconia ocampensis	Skean, Judd & Majure	Mecranium septentrionale Skean	Miconia ocampensis Skean, Judd & Majure
Mecranium tricostatum	Urb. & Ekman	Miconia tricostata	(Urb. & Ekman) Skean, Judd & Majure	Mecranium tricostatum Urb. & Ekman	Miconia tricostata (Urb. & Ekman) Skean, Judd & Majure
Mecranium tuberculatum	Urb.	Miconia haemanthoides	Skean, Judd & Majure	Mecranium tuberculatum Urb.	Miconia haemanthoides Skean, Judd & Majure
Mecranium virgatum	(Sw.) Triana	Miconia virgata	(Sw.) Skean, Judd & Majure	Mecranium virgatum (Sw.) Triana	Miconia virgata (Sw.) Skean, Judd & Majure
Miconiastrum lambertianum	Bonpl. ex Naudin	Miconia maestrensis	Judd, Bécquer, & Majure	Miconiastrum lambertianum Bonpl. ex Naudin	Miconia maestrensis Judd, Bécquer, & Majure
Microlepis oleaefolia	DC.	Pleroma oleifolium	(DC.) R. Romero & Versiane	Microlepis oleaefolia DC.	Pleroma oleifolium (DC.) R. Romero & Versiane
Myriaspora egensis	DC.	Bellucia egensis	(DC.) Penneys, Michelangeli, Judd & Almeda	Myriaspora egensis DC.	Bellucia egensis (DC.) Penneys, Michelangeli, Judd & Almeda
Necramium gigantophyllum	Britton	Miconia gigantophylla	(Britton) Michelang.	Necramium gigantophyllum Britton	Miconia gigantophylla (Britton) Michelang.
Ossaea acunae		Miconia acunagalei	Judd, Bécquer & Majure	Ossaea acunae	Miconia acunagalei Judd, Bécquer & Majure
Ossaea amygdaloides	(DC.) Triana	Miconia amygdaloides	(DC.) R.Goldenb.	Ossaea amygdaloides (DC.) Triana	Miconia amygdaloides (DC.) R.Goldenb.
Ossaea angustifolia	(DC.) Triana	Miconia corcovadensis	(Raddi) R.Goldenb.	Ossaea angustifolia (DC.) Triana	Miconia corcovadensis (Raddi) R.Goldenb.
Ossaea araneifera	Markgr.	Miconia araneifera	(Markg.) Michelang. & R.Goldenb.	Ossaea araneifera Markgr.	Miconia araneifera (Markg.) Michelang. & R.Goldenb.
Ossaea asperifolia	(Naudin) Triana	Miconia asperifolia	(Naudin) Majure & Judd	Ossaea asperifolia (Naudin) Triana	Miconia asperifolia (Naudin) Majure & Judd
Ossaea asplundii	Wurdack	Miconia alboglandulosa	Gamba & Almeda	Ossaea asplundii Wurdack	Miconia alboglandulosa Gamba & Almeda
Ossaea baracoensis	Borhidi & O. Muñiz	Miconia borhidiana	Judd, Bécquer & Majure	Ossaea baracoensis Borhidi & O. Muñiz	Miconia borhidiana Judd, Bécquer & Majure
Ossaea boekei	Wurdack	Miconia boekei	(Wurdack) Gamba & Almeda	Ossaea boekei Wurdack	Miconia boekei (Wurdack) Gamba & Almeda
Ossaea boliviensis	(Cogn.) Gleason	Miconia violascens	(Pilg.) Michelang. & R.Goldenb.	Ossaea boliviensis (Cogn.) Gleason	Miconia violascens (Pilg.) Michelang. & R.Goldenb.
Ossaea brachystemon	Urb	Miconia brachystemon	(Urb.) Judd, Bécquer & Majure	Ossaea brachystemon Urb	Miconia brachystemon (Urb.) Judd, Bécquer & Majure
Ossaea bracteata	Triana	Miconia bractiflora	Gamba & Almeda	Ossaea bracteata Triana	Miconia bractiflora Gamba & Almeda
Ossaea brenesii	Standley	Miconia albertobrenesii	Gamba & Almeda	Ossaea brenesii Standley	Miconia albertobrenesii Gamba & Almeda
Ossaea brunescens	Urb.	Miconia brunescens	((Urb.)) Bécquer & Skean	Ossaea brunescens Urb.	Miconia brunescens ((Urb.)) Bécquer & Skean
Ossaea buchtienii	Gleason	Miconia ottobuchtienii	Michelang. & R.Goldenb.	Ossaea buchtienii Gleason	Miconia ottobuchtienii Michelang. & R.Goldenb.
Ossaea bullifera	(Pilg.) Gleason	Miconia myrmecodomatia	Michelang.	Ossaea bullifera (Pilg.) Gleason	Miconia myrmecodomatia Michelang.
Ossaea cabraliensis	(Wurdack) D'El Rei Souza	Miconia cabraliensis	(Wurdack) R.Goldenb.	Ossaea cabraliensis (Wurdack) D'El Rei Souza	Miconia cabraliensis (Wurdack) R.Goldenb.
Ossaea capillaris	(D.Don) Cogn.	Miconia leptopus	(Triana) Michelang. & R.Goldenb.	Ossaea capillaris (D.Don) Cogn.	Miconia leptopus (Triana) Michelang. & R.Goldenb.
Ossaea capitata	Urb.	Miconia tentaculicapitata	Majure & Judd	Ossaea capitata Urb.	Miconia tentaculicapitata Majure & Judd
Ossaea cinnamomifolia	(Cham. ex Naudin) Triana	Miconia leacinnamomifolia	R.Goldenb.	Ossaea cinnamomifolia (Cham. ex Naudin) Triana	Miconia leacinnamomifolia R.Goldenb.
Ossaea coarctiflora	Wurdack	Miconia coarctiflora	(Wurdack) G. Ocampo & Almeda	Ossaea coarctiflora Wurdack	Miconia coarctiflora (Wurdack) G. Ocampo & Almeda
Ossaea confertiflora	(DC.) Triana	Miconia rubella	(Raddi) R.Goldenb.	Ossaea confertiflora (DC.) Triana	Miconia rubella (Raddi) R.Goldenb.
Ossaea congestiflora	Cogn.	Miconia leacongestiflora	R.Goldenb.	Ossaea congestiflora Cogn.	Miconia leacongestiflora R.Goldenb.
Ossaea coriacea	(Naudin) Triana	Miconia leabiscoriacea	R.Goldenb.	Ossaea coriacea (Naudin) Triana	Miconia leabiscoriacea R.Goldenb.
Ossaea costata	Urb.	Miconia costata	(Urb.) Judd, Bécquer & Majure	Ossaea costata Urb.	Miconia costata (Urb.) Judd, Bécquer & Majure
Ossaea cubana	Alain	Miconia cubana	(Alain) Majure & Judd	Ossaea cubana Alain	Miconia cubana (Alain) Majure & Judd
Ossaea cucullata	Gleason	Miconia cucullata	(Gleason) Michelang.	Ossaea cucullata Gleason	Miconia cucullata (Gleason) Michelang.
Ossaea cuneata	Cogn.	Miconia leacuneata	R.Goldenb.	Ossaea cuneata Cogn.	Miconia leacuneata R.Goldenb.
Ossaea echinata	(Griseb.) M. Gómez	Miconia echinata	(Griseb.) Judd, Bécquer & Majure	Ossaea echinata (Griseb.) M. Gómez	Miconia echinata (Griseb.) Judd, Bécquer & Majure
Ossaea ekmanii	Urb.	Miconia ekmanii	(Urb.) Judd, Bécquer & Majure	Ossaea ekmanii Urb.	Miconia ekmanii (Urb.) Judd, Bécquer & Majure
Ossaea elliptica	Alain	Miconia ascenditricha	Judd, Bécquer & Majure	Ossaea elliptica Alain	Miconia ascenditricha Judd, Bécquer & Majure
Ossaea euphorbioides	(Naudin) Triana	Miconia euphorbioides	(Naudin) R.Goldenb.	Ossaea euphorbioides (Naudin) Triana	Miconia euphorbioides (Naudin) R.Goldenb.
Ossaea filisepala	Urb.	Miconia filisepala	(Urb.) Judd, Bécquer & Majure	Ossaea filisepala Urb.	Miconia filisepala (Urb.) Judd, Bécquer & Majure
Ossaea filisepala	Urb.	Miconia filisepala	(Urb.) Judd, Bécquer & Majure	Ossaea filisepala Urb.	Miconia filisepala (Urb.) Judd, Bécquer & Majure
Ossaea fragilis	Cogn.	Miconia leafragilis	R.Goldenb.	Ossaea fragilis Cogn.	Miconia leafragilis R.Goldenb.
Ossaea glomerata	(Naudin) Triana	Miconia glomeruliflora	Judd, Bécquer&Majure	Ossaea glomerata (Naudin) Triana	Miconia glomeruliflora Judd, Bécquer&Majure
Ossaea granulata	Urb.	Miconia granulata	(Urb.) Majure & Judd	Ossaea granulata Urb.	Miconia granulata (Urb.) Majure & Judd
Ossaea heterotricha	(Griseb.) C. Wright	Miconia yunquensis	Judd, Bécquer & Majure	Ossaea heterotricha (Griseb.) C. Wright	Miconia yunquensis Judd, Bécquer & Majure
Ossaea hirsuta	(Sw.) Triana	Miconia hirsuta	(Sw.) Judd, Bécquer & Majure	Ossaea hirsuta (Sw.) Triana	Miconia hirsuta (Sw.) Judd, Bécquer & Majure
Ossaea hirtella	(DC.) Triana	Miconia hirtellicaulis	Ionta & Judd	Ossaea hirtella (DC.) Triana	Miconia hirtellicaulis Ionta & Judd
Ossaea hypoglauca	(C. Wright ex Griseb.) M. Gómez	Miconia hypoglauca	(C. Wright ex Griseb.) Judd, Bécquer& Majure	Ossaea hypoglauca (C. Wright ex Griseb.) M. Gómez	Miconia hypoglauca (C. Wright ex Griseb.) Judd, Bécquer& Majure
Ossaea incerta	Wurdack	Miconia incerta	(Wurdack) Gamba & Almeda	Ossaea incerta Wurdack	Miconia incerta (Wurdack) Gamba & Almeda
Ossaea involucrata	(Griseb.) C. Wright	Miconia grandibracteata	Judd, Bécquer & Majure	Ossaea involucrata (Griseb.) C. Wright	Miconia grandibracteata Judd, Bécquer & Majure
Ossaea lanata	(Naudin) C. Wright ex Griseb.	Miconia lanatifolia	Judd, Bécquer & Majure	Ossaea lanata (Naudin) C. Wright ex Griseb.	Miconia lanatifolia Judd, Bécquer & Majure
Ossaea lanceolata	Urb.	Miconia echinocarpa	Judd, Bécquer & Majure	Ossaea lanceolata Urb.	Miconia echinocarpa Judd, Bécquer & Majure
Ossaea laxivenula	Wurdack	Miconia laxivenula	(Wurdack) Gamba & Almeda	Ossaea laxivenula Wurdack	Miconia laxivenula (Wurdack) Gamba & Almeda
Ossaea macrophylla	(Benth.) Cogniaux	Miconia solearis	(Naudin) Gamba & Almeda	Ossaea macrophylla (Benth.) Cogniaux	Miconia solearis (Naudin) Gamba & Almeda
Ossaea marginata	(Desr.) Triana	Miconia leamarginata	R.Goldenb.	Ossaea marginata (Desr.) Triana	Miconia leamarginata R.Goldenb.
Ossaea mavacana	Wurdack	Miconia mavacana	(Wurdack) Michelang.	Ossaea mavacana Wurdack	Miconia mavacana (Wurdack) Michelang.
Ossaea meridionalis	D'El Rei Souza	Miconia meridionalis	(D'El Rei Souza) R.Goldenb.	Ossaea meridionalis D'El Rei Souza	Miconia meridionalis (D'El Rei Souza) R.Goldenb.
Ossaea micrantha	(Sw.) Cogn.	Miconia rubescens	(Triana) Gamba & Almeda	Ossaea micrantha (Sw.) Cogn.	Miconia rubescens (Triana) Gamba & Almeda
Ossaea microphylla	(Sw.) C. Wright	Miconia pratensis	Judd, Bécquer & Majure	Ossaea microphylla (Sw.) C. Wright	Miconia pratensis Judd, Bécquer & Majure
Ossaea moaensis	Alain	Miconia lutgardae	Becquer & Michelang.	Ossaea moaensis Alain	Miconia lutgardae Becquer & Michelang.
Ossaea muricata	(Griseb.) C. Wright	Miconia argentimuricata	Majure & Judd	Ossaea muricata (Griseb.) C. Wright	Miconia argentimuricata Majure & Judd
Ossaea navasensis	Britton & P.Wilson	Miconia navasenssis	(Briton & P Wilson) Ionta & Becquer	Ossaea navasensis Britton & P.Wilson	Miconia navasenssis (Briton & P Wilson) Ionta & Becquer
Ossaea neurotricha	C.Wright	Miconia capillinervis	Ionta & Judd	Ossaea neurotricha C.Wright	Miconia capillinervis Ionta & Judd
Ossaea nipensis	Britton & P.Wilson	Miconia nipensis	(Briton & P Wilson) Ionta & Becquer	Ossaea nipensis Britton & P.Wilson	Miconia nipensis (Briton & P Wilson) Ionta & Becquer
Ossaea norlindii	Urb.	Miconia norlindii	(Urb.) Majure & Judd	Ossaea norlindii Urb.	Miconia norlindii (Urb.) Majure & Judd
Ossaea ottoschmidtii	Urb.	Miconia ottoschmidtii	(Urb.) Majure & Judd	Ossaea ottoschmidtii Urb.	Miconia ottoschmidtii (Urb.) Majure & Judd
Ossaea ovatifolia	Urb.	Miconia ovatifolia	(Urb.) Judd, Bécquer & Majure	Ossaea ovatifolia Urb.	Miconia ovatifolia (Urb.) Judd, Bécquer & Majure
Ossaea palenquensis	Wurdack	Miconia palenquensis	(Wurdack) Gamba & Almeda	Ossaea palenquensis Wurdack	Miconia palenquensis (Wurdack) Gamba & Almeda
Ossaea parvifolia	Alain	Miconia nanophylla	Judd, Bécquer & Majure	Ossaea parvifolia Alain	Miconia nanophylla Judd, Bécquer & Majure
Ossaea petiolaris	(Naudin) Triana	Miconia secunpetiolaris	G. Ocampo & Almeda	Ossaea petiolaris (Naudin) Triana	Miconia secunpetiolaris G. Ocampo & Almeda
Ossaea pilifera	Urb.	Miconia pilifera	(Urb.) Ionta & Becquer	Ossaea pilifera Urb.	Miconia pilifera (Urb.) Ionta & Becquer
Ossaea pinetorum	Alain	Miconia pseudopinetorum	(Alain) Judd, Bécquer & Majure	Ossaea pinetorum Alain	Miconia pseudopinetorum (Alain) Judd, Bécquer & Majure
Ossaea pseudopinetorum	Borhidi & O. Muñiz	Miconia pseudopinetorum	(Alain) Judd, Bécquer & Majure	Ossaea pseudopinetorum Borhidi & O. Muñiz	Miconia pseudopinetorum (Alain) Judd, Bécquer & Majure
Ossaea pulchra	Alain	Miconia vazquezii	(Borhidi & Muniz) Ionta & Becquer	Ossaea pulchra Alain	Miconia vazquezii (Borhidi & Muniz) Ionta & Becquer
Ossaea pulverulenta	Urb.	Miconia pulverata	Judd, Bécquer & Majure	Ossaea pulverulenta Urb.	Miconia pulverata Judd, Bécquer & Majure
Ossaea quadrisulca	(Naudin) Wurdack	Miconia quadrisulca	(Naudin) G. Ocampo & Almeda	Ossaea quadrisulca (Naudin) Wurdack	Miconia quadrisulca (Naudin) G. Ocampo & Almeda
Ossaea resinosa	Gleason	Miconia resinosa	(Gleason) Michelang.	Ossaea resinosa Gleason	Miconia resinosa (Gleason) Michelang.
Ossaea retropila	(DC.) Triana	Miconia retropila	(Triana) G. Ocampo & Almeda	Ossaea retropila (DC.) Triana	Miconia retropila (Triana) G. Ocampo & Almeda
Ossaea robusta	(Triana) Cogniaux	Miconia variabilis	Gamba & Almeda	Ossaea robusta (Triana) Cogniaux	Miconia variabilis Gamba & Almeda
Ossaea rubrinervis	Urb. & Ekman	Miconia rufinervis	Judd	Ossaea rubrinervis Urb. & Ekman	Miconia rufinervis Judd
Ossaea rufescens	(Griseb.) Wright	Miconia ruficaulis	Ionta & Becquer	Ossaea rufescens (Griseb.) Wright	Miconia ruficaulis Ionta & Becquer
Ossaea rufibarbis	Triana	Miconia rufibarbis	(Triana) Gamba & Almeda	Ossaea rufibarbis Triana	Miconia rufibarbis (Triana) Gamba & Almeda
Ossaea sanguinea	Cogn.	Miconia leasanguinea	R.Goldenb.	Ossaea sanguinea Cogn.	Miconia leasanguinea R.Goldenb.
Ossaea secundiflora	Cogn.	Miconia bisecundiflora	G. Ocampo & Almeda	Ossaea secundiflora Cogn.	Miconia bisecundiflora G. Ocampo & Almeda
Ossaea sessilifolia	(Triana) Wurdack	Miconia sessilis	Gamba & Almeda	Ossaea sessilifolia (Triana) Wurdack	Miconia sessilis Gamba & Almeda
Ossaea shaferi	Britton & Wilson	Miconia jashaferi	Majure & Judd	Ossaea shaferi Britton & Wilson	Miconia jashaferi Majure & Judd
Ossaea sparrei	Wurdack	Miconia bensparrei	Gamba & Almeda	Ossaea sparrei Wurdack	Miconia bensparrei Gamba & Almeda
Ossaea spicata	Gleason	Miconia spicata	(Gleason) Gamba & Almeda	Ossaea spicata Gleason	Miconia spicata (Gleason) Gamba & Almeda
Ossaea sulbahiensis	D'El Rei Souza	Miconia sulbahiensis	(D'El Rei Souza) R.Goldenb.	Ossaea sulbahiensis D'El Rei Souza	Miconia sulbahiensis (D'El Rei Souza) R.Goldenb.
Ossaea suprabasalis	R.Goldenb. & Reginato	Miconia suprabasalis	(R.Goldenb. & Reginato) R.Goldenb.	Ossaea suprabasalis R.Goldenb. & Reginato	Miconia suprabasalis (R.Goldenb. & Reginato) R.Goldenb.
Ossaea trianaei	Cogn.	Miconia trianana	Judd & Becquer	Ossaea trianaei Cogn.	Miconia trianana Judd & Becquer
Ossaea turquinensis	Urb	Miconia norlindii	(Urb.) Majure & Judd	Ossaea turquinensis Urb	Miconia norlindii (Urb.) Majure & Judd
Ossaea vazquezii	Borhidi & O.Muniz	Miconia vazquezii	(Borhidi & O.Muniz) Ionta & Becquer	Ossaea vazquezii Borhidi & O.Muniz	Miconia vazquezii (Borhidi & O.Muniz) Ionta & Becquer
Ossaea verrucosa	(Griseb.) M. Gómez	Miconia costata	(Urb.) Judd, Bécquer & Majure	Ossaea verrucosa (Griseb.) M. Gómez	Miconia costata (Urb.) Judd, Bécquer & Majure
Ossaea warmingiana	Cogn.	Miconia leabiswarmingiana	R.Goldenb.	Ossaea warmingiana Cogn.	Miconia leabiswarmingiana R.Goldenb.
Ossaea wilsonii	Alain	Miconia scaberrima	Judd, Bécquer & Majure	Ossaea wilsonii Alain	Miconia scaberrima Judd, Bécquer & Majure
Ossaea wrightii	Triana	Miconia munizii	(Borhidi) Ionta & Becquer	Ossaea wrightii Triana	Miconia munizii (Borhidi) Ionta & Becquer
Pachyanthus angustifolius	Griseb.	Miconia secundo-angustifolia	(Griseb.) M. Gomez	Pachyanthus angustifolius Griseb.	Miconia secundo-angustifolia (Griseb.) M. Gomez
Pachyanthus blancheanus	(Urb.) Urb. & Ekman	Miconia blancheana	Urb.	Pachyanthus blancheanus (Urb.) Urb. & Ekman	Miconia blancheana Urb.
Pachyanthus clementis	P.Wilson	Miconia clementii	(P.Wilson) Becquer	Pachyanthus clementis P.Wilson	Miconia clementii (P.Wilson) Becquer
Pachyanthus cubensis	A.Rich.	Miconia pachyantha	Becquer	Pachyanthus cubensis A.Rich.	Miconia pachyantha Becquer
Pachyanthus discolor	Norlind ex Urb.	Miconia discolorata	Becquer	Pachyanthus discolor Norlind ex Urb.	Miconia discolorata Becquer
Pachyanthus longifolius	Jenn.	Miconia brachyloba	(Urb.) Becquer	Pachyanthus longifolius Jenn.	Miconia brachyloba (Urb.) Becquer
Pachyanthus lundellianus	(L.O.Williams) Judd & Skean	Miconia lundelliana	L.O.Williams	Pachyanthus lundellianus (L.O.Williams) Judd & Skean	Miconia lundelliana L.O.Williams
Pachyanthus mantuensis	Britton & P.Wilson	Miconia mantuensis	(Britton & P.Wilson) Becquer	Pachyanthus mantuensis Britton & P.Wilson	Miconia mantuensis (Britton & P.Wilson) Becquer
Pachyanthus mayarensis	Urb.	Miconia mayarensis	(Urb.) Becquer & Michelang.	Pachyanthus mayarensis Urb.	Miconia mayarensis (Urb.) Becquer & Michelang.
Pachyanthus moaensis	Borhidi	Miconia yamanigueyensis	Becquer & Michelang.	Pachyanthus moaensis Borhidi	Miconia yamanigueyensis Becquer & Michelang.
Pachyanthus monocephalus	(Urb.) Borhidi	Miconia monocephala	Urb.	Pachyanthus monocephalus (Urb.) Borhidi	Miconia monocephala Urb.
Pachyanthus monopleurus	Urb.	Miconia monopleura	(Urb.) Becquer & Majure	Pachyanthus monopleurus Urb.	Miconia monopleura (Urb.) Becquer & Majure
Pachyanthus neglectus	Borhidi	Miconia omissa	Becquer & Michelang.	Pachyanthus neglectus Borhidi	Miconia omissa Becquer & Michelang.
Pachyanthus oleifolius	Griseb.	Miconia oleifolia	(Griseb.) M. Gomez	Pachyanthus oleifolius Griseb.	Miconia oleifolia (Griseb.) M. Gomez
Pachyanthus pedicellatus	Urb.	Miconia pseudopedicellata	Judd & Becquer	Pachyanthus pedicellatus Urb.	Miconia pseudopedicellata Judd & Becquer
Pachyanthus poiretii	Griseb.	Miconia poiretii	(Griseb.) M. Gomez	Pachyanthus poiretii Griseb.	Miconia poiretii (Griseb.) M. Gomez
Pachyanthus reticulatus	Britton & P.Wilson	Miconia lindmanii	(Urb.) Becquer	Pachyanthus reticulatus Britton & P.Wilson	Miconia lindmanii (Urb.) Becquer
Pachyanthus tetramerus	Urb. & Ekman	Miconia tetramera	(Urb. & Ekman) Becquer	Pachyanthus tetramerus Urb. & Ekman	Miconia tetramera (Urb. & Ekman) Becquer
Pachyanthus wrightii	Griseb.	Miconia wrightii	(Griseb.) Triana	Pachyanthus wrightii Griseb.	Miconia wrightii (Griseb.) Triana
Pleiochiton amorimii	Reginato & R.Goldenb.	Miconia amorimii	(Reginato & R. Goldenb) R.Goldenb.	Pleiochiton amorimii Reginato & R.Goldenb.	Miconia amorimii (Reginato & R. Goldenb) R.Goldenb.
Pleiochiton blepharodes	(DC.) Reginato, R.Goldenb. & Baumgratz; comb.	Miconia blepharodes	(DC.) R.Goldenb.	Pleiochiton blepharodes (DC.) Reginato, R.Goldenb. & Baumgratz; comb.	Miconia blepharodes (DC.) R.Goldenb.
Pleiochiton crassifolium	Naudin ex A.Gray	Miconia pleiocrassifolia	R.Goldenb.	Pleiochiton crassifolium Naudin ex A.Gray	Miconia pleiocrassifolia R.Goldenb.
Pleiochiton ebracteatum	Triana	Miconia ebracteata	(Triana) R.Goldenb.	Pleiochiton ebracteatum Triana	Miconia ebracteata (Triana) R.Goldenb.
Pleiochiton glaziovianum	Cogn.	Miconia pleioglazioviana	R.Goldenb.	Pleiochiton glaziovianum Cogn.	Miconia pleioglazioviana R.Goldenb.
Pleiochiton longipetiolatum	Brade	Miconia longipetiolata	(Brade) R.Goldenb.	Pleiochiton longipetiolatum Brade	Miconia longipetiolata (Brade) R.Goldenb.
Pleiochiton magdalenense	Brade	Miconia pleiomagdalenensis	R.Goldenb.	Pleiochiton magdalenense Brade	Miconia pleiomagdalenensis R.Goldenb.
Pleiochiton micranthum	Cogn.	Miconia pleiomicrantha	R.Goldenb.	Pleiochiton micranthum Cogn.	Miconia pleiomicrantha R.Goldenb.
Pleiochiton parasiticum	(O'Berg ex Triana) Reginato, R.Goldenb. & Baumgratz	Miconia parasitica	(O.Berg ex Triana) R.Goldenb.	Pleiochiton parasiticum (O'Berg ex Triana) Reginato, R.Goldenb. & Baumgratz	Miconia parasitica (O.Berg ex Triana) R.Goldenb.
Pleiochiton parvifolium	Cogn.	Miconia pleioparvifolia	R.Goldenb.	Pleiochiton parvifolium Cogn.	Miconia pleioparvifolia R.Goldenb.
Pleiochiton roseum	Cogn.	Miconia pleiorosea	R.Goldenb.	Pleiochiton roseum Cogn.	Miconia pleiorosea R.Goldenb.
Pleiochiton setulosum	Cogn.	Miconia pleiosetulosa	R.Goldenb.	Pleiochiton setulosum Cogn.	Miconia pleiosetulosa R.Goldenb.
Purpurella cleistoflora	Ule	Pleroma cleistoflorum	(Ule) P.J.F.Guim., Oliveira da Silva & Michelang.	Purpurella cleistoflora Ule	Pleroma cleistoflorum (Ule) P.J.F.Guim., Oliveira da Silva & Michelang.
Sagraea abbottii	(Urb.) Alain	Miconia abbottii	(Urb.) Ionta & Judd	Sagraea abbottii (Urb.) Alain	Miconia abbottii (Urb.) Ionta & Judd
Sagraea barahonensis	(Urb. & Ekman) Alain	Miconia barahonensis	(Urb. & Ekman) Ionta & Judd	Sagraea barahonensis (Urb. & Ekman) Alain	Miconia barahonensis (Urb. & Ekman) Ionta & Judd
Sagraea capillaris	(Sw.) DC.	Miconia capillaris	(Sw.) Ionta, Judd & Skean	Sagraea capillaris (Sw.) DC.	Miconia capillaris (Sw.) Ionta, Judd & Skean
Sagraea cinerea	(Cogn.) Alain	Miconia cinereiformis	Ionta, Judd & Skean	Sagraea cinerea (Cogn.) Alain	Miconia cinereiformis Ionta, Judd & Skean
Sagraea curvipila	(Urb. & Ekman) Alain	Miconia curvipila	(Urb. & Ekman) Ionta, Judd & Skean	Sagraea curvipila (Urb. & Ekman) Alain	Miconia curvipila (Urb. & Ekman) Ionta, Judd & Skean
Sagraea ellipsoidea	(Urb. & Ekman) Alain	Miconia ellipsoidea	(Urb. & Ekman) Ionta, Judd & Skean	Sagraea ellipsoidea (Urb. & Ekman) Alain	Miconia ellipsoidea (Urb. & Ekman) Ionta, Judd & Skean
Sagraea fuertesii	(Cogn.) Alain	Miconia miguelfuertesii	Ionta & Judd	Sagraea fuertesii (Cogn.) Alain	Miconia miguelfuertesii Ionta & Judd
Sagraea gracilis	(Alain) Alain	Miconia gracilifolia	Ionta & Judd	Sagraea gracilis (Alain) Alain	Miconia gracilifolia Ionta & Judd
Sagraea lanceifolia	(Urb.) Alain	Miconia lanceifolia	(Urb.) Ionta, Judd & Skean	Sagraea lanceifolia (Urb.) Alain	Miconia lanceifolia (Urb.) Ionta, Judd & Skean
Sagraea oligantha	(Urb.) Alain	Miconia spanantha	Judd & Majure	Sagraea oligantha (Urb.) Alain	Miconia spanantha Judd & Majure
Sagraea penninervis	(Griseb.) Triana	Miconia penninervis	(Griseb.) M. Gomez	Sagraea penninervis (Griseb.) Triana	Miconia penninervis (Griseb.) M. Gomez
Sagraea polychaete	(Urb. & Ekman) Alain	Miconia polychaete	(Urb. & Ekman) Ionta, Judd & Skean	Sagraea polychaete (Urb. & Ekman) Alain	Miconia polychaete (Urb. & Ekman) Ionta, Judd & Skean
Sagraea pusilliflora	(Cogn.) Alain	Miconia portoricensis	(Alain) Ionta, Judd & Skean	Sagraea pusilliflora (Cogn.) Alain	Miconia portoricensis (Alain) Ionta, Judd & Skean
Sagraea scabrosa	(L.) Naudin	Miconia scabrosa	(L.) Ionta, Judd & Skean	Sagraea scabrosa (L.) Naudin	Miconia scabrosa (L.) Ionta, Judd & Skean
Sagraea setulosa	(Urb.) Alain	Miconia rubrisetulosa	Ionta, Judd & Skean	Sagraea setulosa (Urb.) Alain	Miconia rubrisetulosa Ionta, Judd & Skean
Sagraea woodsii	(Judd & Skean) Alain	Miconia woodsii	(Judd & Skean) Ionta, Judd & Skean	Sagraea woodsii (Judd & Skean) Alain	Miconia woodsii (Judd & Skean) Ionta, Judd & Skean
Salpinga margaritacea	(Naudin) Triana	Bertolonia margaritacea	Naudin	Salpinga margaritacea (Naudin) Triana	Bertolonia margaritacea Naudin
Svitramia hatschbachii	Wurdack	Pleroma gertii	P.J.F. Guim. & Michelang.	Svitramia hatschbachii Wurdack	Pleroma gertii P.J.F. Guim. & Michelang.
Svitramia integerrima	R.Romero & A.B.Martins	Pleroma integerrima	(R.Romero & A.B.Martins) P.J.F. Guim. & Michelang.	Svitramia integerrima R.Romero & A.B.Martins	Pleroma integerrima (R.Romero & A.B.Martins) P.J.F. Guim. & Michelang.
Svitramia minor	R.Romero & A.B.Martins	Pleroma minus	(R.Romero & A.B.Martins) P.J.F. Guim. & Michelang.	Svitramia minor R.Romero & A.B.Martins	Pleroma minus (R.Romero & A.B.Martins) P.J.F. Guim. & Michelang.
Svitramia petiolata	R.Romero & A.B.Martins	Pleroma petiolatum	(R.Romero & A.B.Martins) P.J.F. Guim. & Michelang.	Svitramia petiolata R.Romero & A.B.Martins	Pleroma petiolatum (R.Romero & A.B.Martins) P.J.F. Guim. & Michelang.
Svitramia pulchra	Cham.	Pleroma bandeirae	P.J.F. Guim. & Michelang.	Svitramia pulchra Cham.	Pleroma bandeirae P.J.F. Guim. & Michelang.
Svitramia wurdackiana	R.Romero & A.B.Martins	Pleroma wurdackianum	(R.Romero & A.B.Martins) P.J.F. Guim. & Michelang.	Svitramia wurdackiana R.Romero & A.B.Martins	Pleroma wurdackianum (R.Romero & A.B.Martins) P.J.F. Guim. & Michelang.
Tetrazygia albicans	Triana	Miconia proctorii	Judd	Tetrazygia albicans Triana	Miconia proctorii Judd
Tetrazygia angustiflora	(Benth.) Griseb.	Miconia angustiflora	(Benth.) Naudin	Tetrazygia angustiflora (Benth.) Griseb.	Miconia angustiflora (Benth.) Naudin
Tetrazygia angustifolia	(Sw.) DC.	Miconia angustifolia	(Sw.) Griseb.	Tetrazygia angustifolia (Sw.) DC.	Miconia angustifolia (Sw.) Griseb.
Tetrazygia aurea	R.A.Howard & W.R.Briggs	Miconia aurifolia	Becquer & Judd	Tetrazygia aurea R.A.Howard & W.R.Briggs	Miconia aurifolia Becquer & Judd
Tetrazygia barbata	Borhidi	Miconia barbata	(Borhidi) Judd, Bécquer, & Majure	Tetrazygia barbata Borhidi	Miconia barbata (Borhidi) Judd, Bécquer, & Majure
Tetrazygia bicolor	(Mill.) Cogn.	Miconia bicolor	(Mill.) Triana	Tetrazygia bicolor (Mill.) Cogn.	Miconia bicolor (Mill.) Triana
Tetrazygia bicolor var. patenti-setosa	Borhidi	Miconia bicolor var. patenti-setosa	(Borhidi) Judd, Bécquer, & Majure	Tetrazygia bicolor var. patenti-setosa Borhidi	Miconia bicolor var. patenti-setosa (Borhidi) Judd, Bécquer, & Majure
Tetrazygia biflora	(Cogn.) Urb.	Miconia biflora	(Cogn.) Judd	Tetrazygia biflora (Cogn.) Urb.	Miconia biflora (Cogn.) Judd
Tetrazygia brachycentra	(Griseb.) C. Wright	Miconia brachycentra	(Griseb.) M. Gomez	Tetrazygia brachycentra (Griseb.) C. Wright	Miconia brachycentra (Griseb.) M. Gomez
Tetrazygia cordata	Alain	Miconia cordilamina	Becquer & Judd	Tetrazygia cordata Alain	Miconia cordilamina Becquer & Judd
Tetrazygia coriacea	Urb.	Miconia cajalbanensis	Judd, Bécquer, & Majure	Tetrazygia coriacea Urb.	Miconia cajalbanensis Judd, Bécquer, & Majure
Tetrazygia cristalensis	Borhidi	Miconia cristalensis	(Borhidi) Judd, Bécquer, & Majure	Tetrazygia cristalensis Borhidi	Miconia cristalensis (Borhidi) Judd, Bécquer, & Majure
Tetrazygia decorticans	Becquer	Miconia decorticans	(Becquer) Becquer & Majure	Tetrazygia decorticans Becquer	Miconia decorticans (Becquer) Becquer & Majure
Tetrazygia discolor	(L.) DC.	Miconia christophoriana	(Ham.) DC.	Tetrazygia discolor (L.) DC.	Miconia christophoriana (Ham.) DC.
Tetrazygia ekmanii	Urb.	Miconia tetrazygioidea	Becquer & Judd	Tetrazygia ekmanii Urb.	Miconia tetrazygioidea Becquer & Judd
Tetrazygia elaeagnoides	(Sw.) DC	Miconia elaeagnoides	(Sw.) Griseb.	Tetrazygia elaeagnoides (Sw.) DC	Miconia elaeagnoides (Sw.) Griseb.
Tetrazygia elegans	Urb.	Miconia elegantissima	Becquer & Judd	Tetrazygia elegans Urb.	Miconia elegantissima Becquer & Judd
Tetrazygia fadyenii	Hook.	Miconia fadyenii	(Hook.) Judd & Skean	Tetrazygia fadyenii Hook.	Miconia fadyenii (Hook.) Judd & Skean
Tetrazygia hispida	(Sw.) Macfad.	Miconia glandulosa	(Sw.) Naudin	Tetrazygia hispida (Sw.) Macfad.	Miconia glandulosa (Sw.) Naudin
Tetrazygia impressa	Urb	Miconia impressa	(Urb.) Judd, Bécquer, & Majure	Tetrazygia impressa Urb	Miconia impressa (Urb.) Judd, Bécquer, & Majure
Tetrazygia lanceolata	Urb.,	Miconia guajaibonensis	Judd, Bécquer, & Majure	Tetrazygia lanceolata Urb.,	Miconia guajaibonensis Judd, Bécquer, & Majure
Tetrazygia laxiflora	Naudin	Miconia rangeliana	C.Wright ex Griseb.	Tetrazygia laxiflora Naudin	Miconia rangeliana C.Wright ex Griseb.
Tetrazygia longicollis	Urb. & Cogn.	Miconia longicollis	(Urb. & Ekman) Judd & Becquer	Tetrazygia longicollis Urb. & Cogn.	Miconia longicollis (Urb. & Ekman) Judd & Becquer
Tetrazygia paralongicollis	Judd, Ionta, Clase & Skean	Miconia paralongicollis	(Judd et al.) Judd & Becquer	Tetrazygia paralongicollis Judd, Ionta, Clase & Skean	Miconia paralongicollis (Judd et al.) Judd & Becquer
Tetrazygia urbani	Cogn.	Miconia urbanii	(Cogn.) Judd	Tetrazygia urbani Cogn.	Miconia urbanii (Cogn.) Judd
Tibouchina ackermannii	Cogn.	Pleroma ackermannii	(Cogn.) P. J. F. Guim. & Michelang.	Tibouchina ackermannii Cogn.	Pleroma ackermannii (Cogn.) P. J. F. Guim. & Michelang.
Tibouchina ademarii	P.J.F.Guim., R. Romero & Leoni	Pleroma ademarii	(P.J.F.Guim., R.Romero & Leoni) P. J. F. Guim. & Michelang.	Tibouchina ademarii P.J.F.Guim., R. Romero & Leoni	Pleroma ademarii (P.J.F.Guim., R.Romero & Leoni) P. J. F. Guim. & Michelang.
Tibouchina adenophora	Cogn.	Chaetogastra adenophora	(Cogn.) P.J.F. Guim. & Michelang.	Tibouchina adenophora Cogn.	Chaetogastra adenophora (Cogn.) P.J.F. Guim. & Michelang.
Tibouchina alata	Cogn.	Pleroma alatum	(Cogn.) P. J. F. Guim. & Michelang.	Tibouchina alata Cogn.	Pleroma alatum (Cogn.) P. J. F. Guim. & Michelang.
Tibouchina almedae	Todzia	Chaetogastra almedae	(Todzia) P.J.F. Guim. & Michelang.	Tibouchina almedae Todzia	Chaetogastra almedae (Todzia) P.J.F. Guim. & Michelang.
Tibouchina alpestris	Cogn.	Chaetogastra montana	P.J.F. Guim. & Michelang.	Tibouchina alpestris Cogn.	Chaetogastra montana P.J.F. Guim. & Michelang.
Tibouchina amoena	Herzog	Pleroma amoenum	(Herzog) P. J. F. Guim. & Michelang.	Tibouchina amoena Herzog	Pleroma amoenum (Herzog) P. J. F. Guim. & Michelang.
Tibouchina anderssonii	Wurdack	Chaetogastra anderssonii	(Wurdack) P.J.F. Guim. & Michelang.	Tibouchina anderssonii Wurdack	Chaetogastra anderssonii (Wurdack) P.J.F. Guim. & Michelang.
Tibouchina andreana	Cogn.	Chaetogastra andreana	(Cogn.) P.J.F. Guim. & Michelang.	Tibouchina andreana Cogn.	Chaetogastra andreana (Cogn.) P.J.F. Guim. & Michelang.
Tibouchina angustifolia	Cogn.	Pleroma angustifolium	(Naud.) Triana	Tibouchina angustifolia Cogn.	Pleroma angustifolium (Naud.) Triana
Tibouchina apparicioi	Brade	Pleroma apparicioi	(Brade) P. J. F. Guim. & Michelang.	Tibouchina apparicioi Brade	Pleroma apparicioi (Brade) P. J. F. Guim. & Michelang.
Tibouchina araneicalyx	de Santiago	Chaetogastra araneicalyx	(de Santiago) P.J.F. Guim. & Michelang.	Tibouchina araneicalyx de Santiago	Chaetogastra araneicalyx (de Santiago) P.J.F. Guim. & Michelang.
Tibouchina arborea	Cogn.	Pleroma arboreum	Gardner	Tibouchina arborea Cogn.	Pleroma arboreum Gardner
Tibouchina arenaria	Cogn.	Pleroma arenarium	(Cogn.) P. J. F. Guim. & Michelang.	Tibouchina arenaria Cogn.	Pleroma arenarium (Cogn.) P. J. F. Guim. & Michelang.
Tibouchina aristeguietae	Wurdack	Andesanthus aristeguietae	(Wurdack) P.J.F.Guim. & Michelang.	Tibouchina aristeguietae Wurdack	Andesanthus aristeguietae (Wurdack) P.J.F.Guim. & Michelang.
Tibouchina arthrostemmoides	Cogn.	Chaetogastra arthrostemmoides	(Cogn.) P.J.F. Guim. & Michelang.	Tibouchina arthrostemmoides Cogn.	Chaetogastra arthrostemmoides (Cogn.) P.J.F. Guim. & Michelang.
Tibouchina asperifolia	Cogn.	Chaetogastra asperifolia	(Cogn.) P.J.F. Guim. & Michelang.	Tibouchina asperifolia Cogn.	Chaetogastra asperifolia (Cogn.) P.J.F. Guim. & Michelang.
Tibouchina asperior	(Cham.) Cogn.	Pleroma asperius	(Cham.) Triana	Tibouchina asperior (Cham.) Cogn.	Pleroma asperius (Cham.) Triana
Tibouchina aurea	Cogn.	Chaetogastra aurea	(Cogn.) P.J.F. Guim. & Michelang.	Tibouchina aurea Cogn.	Chaetogastra aurea (Cogn.) P.J.F. Guim. & Michelang.
Tibouchina australis	Cogn.	Pleroma australe	Triana	Tibouchina australis Cogn.	Pleroma australe Triana
Tibouchina axillaris	Cogn.	Pleroma axillare	(Cogn.) P. J. F. Guim. & Michelang.	Tibouchina axillaris Cogn.	Pleroma axillare (Cogn.) P. J. F. Guim. & Michelang.
Tibouchina bahiensis	Wurdack	Pleroma bahiense	(Wurdack) P. J. F. Guim. & Michelang.	Tibouchina bahiensis Wurdack	Pleroma bahiense (Wurdack) P. J. F. Guim. & Michelang.
Tibouchina barnebyana	Wurdack	Pleroma barnebyanum	(Wurdack) P. J. F. Guim. & Michelang.	Tibouchina barnebyana Wurdack	Pleroma barnebyanum (Wurdack) P. J. F. Guim. & Michelang.
Tibouchina benthamiana	Cogn.	Pleroma benthamianum	Gardner	Tibouchina benthamiana Cogn.	Pleroma benthamianum Gardner
Tibouchina bergiana	Cogn.	Pleroma bergianum	(Cogn.) P. J. F. Guim. & Michelang.	Tibouchina bergiana Cogn.	Pleroma bergianum (Cogn.) P. J. F. Guim. & Michelang.
Tibouchina blanchetiana	Cogn.	Pleroma blanchetianum	(Cogn.) P. J. F. Guim. & Michelang.	Tibouchina blanchetiana Cogn.	Pleroma blanchetianum (Cogn.) P. J. F. Guim. & Michelang.
Tibouchina boraceiensis	Brade	Pleroma boraceiensis	(Brade) P. J. F. Guim. & Michelang.	Tibouchina boraceiensis Brade	Pleroma boraceiensis (Brade) P. J. F. Guim. & Michelang.
Tibouchina boudetii	P.J.F.Guim. & R.Goldenb.	Pleroma boudetii	(P.J.F.Guim. & R.Goldenb.) P. J. F. Guim. & Michelang.	Tibouchina boudetii P.J.F.Guim. & R.Goldenb.	Pleroma boudetii (P.J.F.Guim. & R.Goldenb.) P. J. F. Guim. & Michelang.
Tibouchina bracteolata	J.G. Freitas, A.K.A. Santos & R.P. Oliveira	Pleroma bracteolatum	(J. G. Freitas, A. K. A.Santos & R. P.	Tibouchina bracteolata J.G. Freitas, A.K.A. Santos & R.P. Oliveira	Pleroma bracteolatum (J. G. Freitas, A. K. A.Santos & R. P.
Tibouchina bradeana	Renner	Pleroma edmundoi	(Brade & Markgraf) P.J.F. Guim. & Michelang.	Tibouchina bradeana Renner	Pleroma edmundoi (Brade & Markgraf) P.J.F. Guim. & Michelang.
Tibouchina breedlovei	Wurdack	Heterocentron breedlovei	(Wurdack) P.J.F. Guim. & Michelang.	Tibouchina breedlovei Wurdack	Heterocentron breedlovei (Wurdack) P.J.F. Guim. & Michelang.
Tibouchina brittoniana	Cogn.	Chaetogastra brittoniana	(Cogn. ex Rusby) P.J.F. Guim. & Michelang.	Tibouchina brittoniana Cogn.	Chaetogastra brittoniana (Cogn. ex Rusby) P.J.F. Guim. & Michelang.
Tibouchina campii	Wurdack	Chaetogastra campii	(Wurdack) P.J.F. Guim. & Michelang.	Tibouchina campii Wurdack	Chaetogastra campii (Wurdack) P.J.F. Guim. & Michelang.
Tibouchina candolleana	Cogn.	Pleroma candolleanum	(Mart. ex. DC.) Triana	Tibouchina candolleana Cogn.	Pleroma candolleanum (Mart. ex. DC.) Triana
Tibouchina canescens	Cogn.	Pleroma canescens	(D.Don) P. J. F. Guim. & Michelang.	Tibouchina canescens Cogn.	Pleroma canescens (D.Don) P. J. F. Guim. & Michelang.
Tibouchina capitata	(Naudin) Cogn.	Chaetogastra capitata	(Naudin) P.J.F. Guim. & Michelang.	Tibouchina capitata (Naudin) Cogn.	Chaetogastra capitata (Naudin) P.J.F. Guim. & Michelang.
Tibouchina cardinalis	Cogn.	Pleroma cardinale	(Bonpl.) Triana	Tibouchina cardinalis Cogn.	Pleroma cardinale (Bonpl.) Triana
Tibouchina carvalhoi	Wurdack	Pleroma carvalhoi	(Wurdack) P. J. F. Guim. & Michelang.	Tibouchina carvalhoi Wurdack	Pleroma carvalhoi (Wurdack) P. J. F. Guim. & Michelang.
Tibouchina castellensis	Brade	Pleroma castellense	(Brade) P. J. F. Guim. & Michelang.	Tibouchina castellensis Brade	Pleroma castellense (Brade) P. J. F. Guim. & Michelang.
Tibouchina cerastifolia	Cogn.	Chaetogastra cerastifolia	(Naudin) P.J.F. Guim. & Michelang.	Tibouchina cerastifolia Cogn.	Chaetogastra cerastifolia (Naudin) P.J.F. Guim. & Michelang.
Tibouchina chamaecistus	Cogn.	Chaetogastra chamaecistus	Sieber ex Grisebach	Tibouchina chamaecistus Cogn.	Chaetogastra chamaecistus Sieber ex Grisebach
Tibouchina chamissoana	Cogn.	Pleroma molle	(Cham.) Triana	Tibouchina chamissoana Cogn.	Pleroma molle (Cham.) Triana
Tibouchina chiapensis	Wurdack	Heterocentron chiapense	(Wurdack) P.J.F. Guim. & Michelang.	Tibouchina chiapensis Wurdack	Heterocentron chiapense (Wurdack) P.J.F. Guim. & Michelang.
Tibouchina chironioides	(Triana) Cogn.	Chaetogastra chironioides	Grisebach	Tibouchina chironioides (Triana) Cogn.	Chaetogastra chironioides Grisebach
Tibouchina ciliaris	(Vent.) Cogn.	Chaetogastra ciliaris	DC.	Tibouchina ciliaris (Vent.) Cogn.	Chaetogastra ciliaris DC.
Tibouchina cinerea	Cogn.	Pleroma cinereum	(Cogn.) P. J. F. Guim. & Michelang.	Tibouchina cinerea Cogn.	Pleroma cinereum (Cogn.) P. J. F. Guim. & Michelang.
Tibouchina cisplatensis	Cogn.	Chaetogastra cisplatensis	(Cogn.) P.J.F. Guim. & Michelang.	Tibouchina cisplatensis Cogn.	Chaetogastra cisplatensis (Cogn.) P.J.F. Guim. & Michelang.
Tibouchina cistoides	(Griseb.) Cogn.	Chaetogastra cistoides	Griseb.	Tibouchina cistoides (Griseb.) Cogn.	Chaetogastra cistoides Griseb.
Tibouchina citrina	(Naudin) Cogn.	Chaetogastra citrina	(Naudin) P.J.F. Guim. & Michelang.	Tibouchina citrina (Naudin) Cogn.	Chaetogastra citrina (Naudin) P.J.F. Guim. & Michelang.
Tibouchina claussenii	(Naudin) Cogn.	Pleroma claussenii	(Naud.) Triana	Tibouchina claussenii (Naudin) Cogn.	Pleroma claussenii (Naud.) Triana
Tibouchina clavata	(Pers.) Wurdack	Pleroma clavatum	(Persoon) P. J. F. Guim. & Michelang.	Tibouchina clavata (Pers.) Wurdack	Pleroma clavatum (Persoon) P. J. F. Guim. & Michelang.
Tibouchina clidemioides	Cogn.	Pleroma clidemioides	Berg. ex Trianna	Tibouchina clidemioides Cogn.	Pleroma clidemioides Berg. ex Trianna
Tibouchina clinopodifolia	(DC.) Cogn.	Chaetogastra clinopodifolia	DC.	Tibouchina clinopodifolia (DC.) Cogn.	Chaetogastra clinopodifolia DC.
Tibouchina collina	Cogn.	Pleroma collinum	(Naudin) Triana	Tibouchina collina Cogn.	Pleroma collinum (Naudin) Triana
Tibouchina comosa	J.G. Freitas, A.K.A. Santos & R.P. Oliveira	Pleroma comosum	(J. G. Freitas, A. K. A.Santos & R. P.	Tibouchina comosa J.G. Freitas, A.K.A. Santos & R.P. Oliveira	Pleroma comosum (J. G. Freitas, A. K. A.Santos & R. P.
Tibouchina confertiflora	(Naudin) Cogn.	Chaetogastra confertiflora	(Naudin) P.J.F. Guim. & Michelang.	Tibouchina confertiflora (Naudin) Cogn.	Chaetogastra confertiflora (Naudin) P.J.F. Guim. & Michelang.
Tibouchina congestiflora	Todzia	Chaetogastra congestiflora	(Todzia) P.J.F. Guim. & Michelang.	Tibouchina congestiflora Todzia	Chaetogastra congestiflora (Todzia) P.J.F. Guim. & Michelang.
Tibouchina connata	Todzia	Chaetogastra connata	(Gleason ex Todzia) P.J.F. Guim. & Michelang.	Tibouchina connata Todzia	Chaetogastra connata (Gleason ex Todzia) P.J.F. Guim. & Michelang.
Tibouchina cordifolia	Cogn.	Pleroma cordifolium	(Cogn.) P. J. F. Guim. & Michelang.	Tibouchina cordifolia Cogn.	Pleroma cordifolium (Cogn.) P. J. F. Guim. & Michelang.
Tibouchina cornuta	Gleason	Chaetogastra cornuta	(Gleason) P.J.F. Guim. & Michelang.	Tibouchina cornuta Gleason	Chaetogastra cornuta (Gleason) P.J.F. Guim. & Michelang.
Tibouchina crassiramis	Cogn.	Pleroma crassirame	(Cogn.) P. J. F. Guim. & Michelang.	Tibouchina crassiramis Cogn.	Pleroma crassirame (Cogn.) P. J. F. Guim. & Michelang.
Tibouchina cristata	Brade	Pleroma cristatum	(Brade) P. J. F. Guim. & Michelang.	Tibouchina cristata Brade	Pleroma cristatum (Brade) P. J. F. Guim. & Michelang.
Tibouchina cryptadena	Gleason	Pleroma cryptadenum	(Gleason) P. J. F. Guim. & Michelang.	Tibouchina cryptadena Gleason	Pleroma cryptadenum (Gleason) P. J. F. Guim. & Michelang.
Tibouchina debilis	(Cham.) Cogn.	Chaetogastra debilis	Cham.	Tibouchina debilis (Cham.) Cogn.	Chaetogastra debilis Cham.
Tibouchina decemcostata	Cogn.	Pleroma decemcostatum	(Cogn.) P. J. F. Guim. & Michelang.	Tibouchina decemcostata Cogn.	Pleroma decemcostatum (Cogn.) P. J. F. Guim. & Michelang.
Tibouchina decora	Gleason	Chaetogastra decora	(Gleason) P.J.F. Guim. & Michelang.	Tibouchina decora Gleason	Chaetogastra decora (Gleason) P.J.F. Guim. & Michelang.
Tibouchina dendroides	Cogn.	Pleroma dendroides	(Naud.) Triana	Tibouchina dendroides Cogn.	Pleroma dendroides (Naud.) Triana
Tibouchina dimorphophylla	Gleason	Chaetogastra dimorphylla	(Gleason) P.J.F. Guim. & Michelang.	Tibouchina dimorphophylla Gleason	Chaetogastra dimorphylla (Gleason) P.J.F. Guim. & Michelang.
Tibouchina discolor	Brade	Pleroma discolor	(Brade) P. J. F. Guim. & Michelang.	Tibouchina discolor Brade	Pleroma discolor (Brade) P. J. F. Guim. & Michelang.
Tibouchina divaricata	Cogn.	Pleroma divaricatum	(Cogn.) P. J. F. Guim. & Michelang.	Tibouchina divaricata Cogn.	Pleroma divaricatum (Cogn.) P. J. F. Guim. & Michelang.
Tibouchina dubia	Cogn.	Pleroma dubium	(Cham) P. J. F. Guim. & Michelang.	Tibouchina dubia Cogn.	Pleroma dubium (Cham) P. J. F. Guim. & Michelang.
Tibouchina durangensis	Standl.	Chaetogastra durangensis	(Standl.) P.J.F. Guim. & Michelang.	Tibouchina durangensis Standl.	Chaetogastra durangensis (Standl.) P.J.F. Guim. & Michelang.
Tibouchina dusenii	Cogn.	Pleroma dusenii	(Cogn.) P. J. F. Guim. & Michelang.	Tibouchina dusenii Cogn.	Pleroma dusenii (Cogn.) P. J. F. Guim. & Michelang.
Tibouchina echinata	(Ruiz & Pav.) Cogn.	Chaetogastra echinata	(Ruiz et Pav.) DC.	Tibouchina echinata (Ruiz & Pav.) Cogn.	Chaetogastra echinata (Ruiz et Pav.) DC.
Tibouchina eichleri	Cogn.	Pleroma eichleri	(Cogn.) P. J. F. Guim. & Michelang.	Tibouchina eichleri Cogn.	Pleroma eichleri (Cogn.) P. J. F. Guim. & Michelang.
Tibouchina elegans	(Gardner) Cogn.	Pleroma elegans	Gardner	Tibouchina elegans (Gardner) Cogn.	Pleroma elegans Gardner
Tibouchina elegantula	Todzia & Almeda	Andesanthus elegantulus	(Todzia & Almeda) P.J.F.Guim.& Michelang.	Tibouchina elegantula Todzia & Almeda	Andesanthus elegantulus (Todzia & Almeda) P.J.F.Guim.& Michelang.
Tibouchina erioclada	(Triana) Cogn.	Chaetogastra erioclada	(Triana) P.J.F. Guim. & Michelang.	Tibouchina erioclada (Triana) Cogn.	Chaetogastra erioclada (Triana) P.J.F. Guim. & Michelang.
Tibouchina estrellensis	(Raddi) Cogn.	Pleroma estrellense	(Raddi) P.J.F.Guim. & Michelang.	Tibouchina estrellensis (Raddi) Cogn.	Pleroma estrellense (Raddi) P.J.F.Guim. & Michelang.
Tibouchina excoriata	Cogn.	Chaetogastra excoriata	(Cogn.) P.J.F. Guim. & Michelang.	Tibouchina excoriata Cogn.	Chaetogastra excoriata (Cogn.) P.J.F. Guim. & Michelang.
Tibouchina ferrariana	Cogn.	Chaetogastra ferrariana	(Cogn.) P.J.F. Guim. & Michelang.	Tibouchina ferrariana Cogn.	Chaetogastra ferrariana (Cogn.) P.J.F. Guim. & Michelang.
Tibouchina fissinervia	Cogn.	Pleroma fissinervium	(Schrank & Mart. ex DC.) Gardner	Tibouchina fissinervia Cogn.	Pleroma fissinervium (Schrank & Mart. ex DC.) Gardner
Tibouchina floribunda	Cogn	Pleroma floribundum	(Cogn.) P. J. F. Guim. & Michelang.	Tibouchina floribunda Cogn	Pleroma floribundum (Cogn.) P. J. F. Guim. & Michelang.
Tibouchina formosa	Cogn.	Pleroma formosum	(Cogn.) P. J. F. Guim. & Michelang.	Tibouchina formosa Cogn.	Pleroma formosum (Cogn.) P. J. F. Guim. & Michelang.
Tibouchina fothergillae	(DC.) Cogn.	Pleroma fothergillae	(Schrank et Mat. ex DC.) Triana	Tibouchina fothergillae (DC.) Cogn.	Pleroma fothergillae (Schrank et Mat. ex DC.) Triana
Tibouchina foveolata	Cogn.	Pleroma foveolatum	(Naud.) Triana	Tibouchina foveolata Cogn.	Pleroma foveolatum (Naud.) Triana
Tibouchina francavillana	Cogn.	Pleroma francavillanum	(Cogn.) P. J. F. Guim. & Michelang.	Tibouchina francavillana Cogn.	Pleroma francavillanum (Cogn.) P. J. F. Guim. & Michelang.
Tibouchina frigidula	(DC.) Cogn.	Pleroma frigidulum	(Schrank et Mart. ex DC.) Triana	Tibouchina frigidula (DC.) Cogn.	Pleroma frigidulum (Schrank et Mart. ex DC.) Triana
Tibouchina fulvipilis	Cogn.	Chaetogastra fulvipilis	(Cogn.) P.J.F. Guim. & Michelang.	Tibouchina fulvipilis Cogn.	Chaetogastra fulvipilis (Cogn.) P.J.F. Guim. & Michelang.
Tibouchina galeottiana	(Naudin) Cogn.	Chaetogastra galeottiana	(Naudin) P.J.F. Guim. & Michelang.	Tibouchina galeottiana (Naudin) Cogn.	Chaetogastra galeottiana (Naudin) P.J.F. Guim. & Michelang.
Tibouchina gardneri	(Naudin) Cogn.	Pleroma gardneri	(Naud.) P. J. F. Guim. & Michelang.	Tibouchina gardneri (Naudin) Cogn.	Pleroma gardneri (Naud.) P. J. F. Guim. & Michelang.
Tibouchina gardneriana	Cogn.	Pleroma echinatum	Gardner	Tibouchina gardneriana Cogn.	Pleroma echinatum Gardner
Tibouchina gaudichaudiana	Baill.	Pleroma gaudichaudianum	(DC.) A. Gray	Tibouchina gaudichaudiana Baill.	Pleroma gaudichaudianum (DC.) A. Gray
Tibouchina gayana	(Naudin) Cogn.	Chaetogastra gayana	(Naudin) P.J.F. Guim. & Michelang.	Tibouchina gayana (Naudin) Cogn.	Chaetogastra gayana (Naudin) P.J.F. Guim. & Michelang.
Tibouchina geitneriana	(Schltdl.) Cogn.	Chaetogastra geitneriana	Schltdl.	Tibouchina geitneriana (Schltdl.) Cogn.	Chaetogastra geitneriana Schltdl.
Tibouchina gleasoniana	Wurdack	Andesanthus gleasonianus	(Wurdack) P.J.F.Guim. & Michelang.	Tibouchina gleasoniana Wurdack	Andesanthus gleasonianus (Wurdack) P.J.F.Guim. & Michelang.
Tibouchina goldenbergii	F.S. Mey., P.J.F.Guim. & Kozera	Pleroma goldenbergii	(F.S. Mey., P.J.F. Guim. & Kozera) P. J. F. Guim. & Michelang.	Tibouchina goldenbergii F.S. Mey., P.J.F.Guim. & Kozera	Pleroma goldenbergii (F.S. Mey., P.J.F. Guim. & Kozera) P. J. F. Guim. & Michelang.
Tibouchina gracilis	(Bonpl.) Cogn.	Chaetogastra gracilis	DC.	Tibouchina gracilis (Bonpl.) Cogn.	Chaetogastra gracilis DC.
Tibouchina granulosa	(Desr.) Cogn.	Pleroma granulosum	(Desr.) D. Don	Tibouchina granulosa (Desr.) Cogn.	Pleroma granulosum (Desr.) D. Don
Tibouchina grossa	(L. f.) Cogn.	Chaetogastra grossa	(L. f.) P.J.F. Guim. & Michelang.	Tibouchina grossa (L. f.) Cogn.	Chaetogastra grossa (L. f.) P.J.F. Guim. & Michelang.
Tibouchina hassleri	Cogn.	Chaetogastra hassleri	(Cogn.) P.J.F. Guim. & Michelang.	Tibouchina hassleri Cogn.	Chaetogastra hassleri (Cogn.) P.J.F. Guim. & Michelang.
Tibouchina hatschbachii	Wurdack	Pleroma hatschbachii	(Wurdack) P. J. F. Guim. & Michelang.	Tibouchina hatschbachii Wurdack	Pleroma hatschbachii (Wurdack) P. J. F. Guim. & Michelang.
Tibouchina herbacea	(DC.) Cogn.	Chaetogastra herbacea	(DC.) P.J.F. Guim. & Michelang.	Tibouchina herbacea (DC.) Cogn.	Chaetogastra herbacea (DC.) P.J.F. Guim. & Michelang.
Tibouchina herincquiana	Cogn.	Chaetogastra herincquiana	(Cogn.) P.J.F. Guim. & Michelang.	Tibouchina herincquiana Cogn.	Chaetogastra herincquiana (Cogn.) P.J.F. Guim. & Michelang.
Tibouchina herzogii	Cogn.	Chaetogastra herzogii	(Cogn.) P.J.F. Guim. & Michelang.	Tibouchina herzogii Cogn.	Chaetogastra herzogii (Cogn.) P.J.F. Guim. & Michelang.
Tibouchina heteromalla	(D. Don) Cogn.	Pleroma heteromallum	(D.Don) D.Don	Tibouchina heteromalla (D. Don) Cogn.	Pleroma heteromallum (D.Don) D.Don
Tibouchina hieracioides	Cogn.	Chaetogastra hieracioides	DC.	Tibouchina hieracioides Cogn.	Chaetogastra hieracioides DC.
Tibouchina hintonii	Gleason ex Todzia	Chaetogastra hintonii	Gleason ex P.J.F. Guim. & Michelang.	Tibouchina hintonii Gleason ex Todzia	Chaetogastra hintonii Gleason ex P.J.F. Guim. & Michelang.
Tibouchina hirsutissima	Cogn.	Pleroma hirsutissimum	(Cogn.) P. J. F. Guim. & Michelang.	Tibouchina hirsutissima Cogn.	Pleroma hirsutissimum (Cogn.) P. J. F. Guim. & Michelang.
Tibouchina hospita	Cogn.	Pleroma hospitum	(Schrank et Mart. ex DC.) Triana	Tibouchina hospita Cogn.	Pleroma hospitum (Schrank et Mart. ex DC.) Triana
Tibouchina hutchisonii	Wurdack	Chaetogastra hutchisonii	(Wurdack) P.J.F. Guim. & Michelang.	Tibouchina hutchisonii Wurdack	Chaetogastra hutchisonii (Wurdack) P.J.F. Guim. & Michelang.
Tibouchina incarum	Gleason	Chaetogastra incarum	(Gleason) P.J.F. Guim. & Michelang.	Tibouchina incarum Gleason	Chaetogastra incarum (Gleason) P.J.F. Guim. & Michelang.
Tibouchina inopinata	Wurdack	Andesanthus inopinatus	(Wurdack) P.J.F.Guim. & Michelang.	Tibouchina inopinata Wurdack	Andesanthus inopinatus (Wurdack) P.J.F.Guim. & Michelang.
Tibouchina itatiaiae	Cogn.	Pleroma itatiaiae	(Wawra) P. J. F. Guim. & Michelang.	Tibouchina itatiaiae Cogn.	Pleroma itatiaiae (Wawra) P. J. F. Guim. & Michelang.
Tibouchina kingii	Wurdack	Chaetogastra kingii	(Wurdack) P.J.F. Guim. & Michelang.	Tibouchina kingii Wurdack	Chaetogastra kingii (Wurdack) P.J.F. Guim. & Michelang.
Tibouchina kleinii	Wurdack	Pleroma kleinii	(Wurdack) P. J. F. Guim. & Michelang.	Tibouchina kleinii Wurdack	Pleroma kleinii (Wurdack) P. J. F. Guim. & Michelang.
Tibouchina kuhlmannii	Brade	Pleroma kuhlmannii	(Brade) P. J. F. Guim. & Michelang.	Tibouchina kuhlmannii Brade	Pleroma kuhlmannii (Brade) P. J. F. Guim. & Michelang.
Tibouchina kunhardtii	Gleason	Chaetogastra kunhardtii	(Gleason) P.J.F. Guim. & Michelang.	Tibouchina kunhardtii Gleason	Chaetogastra kunhardtii (Gleason) P.J.F. Guim. & Michelang.
Tibouchina laevicaulis	Wurdack	Pleroma laevicaule	(Cogn. ex Wurdack) P. J. F. Guim. & Michelang.	Tibouchina laevicaulis Wurdack	Pleroma laevicaule (Cogn. ex Wurdack) P. J. F. Guim. & Michelang.
Tibouchina laevis	Cogn.	Chaetogastra laevis	(Cogn.) P.J.F. Guim. & Michelang.	Tibouchina laevis Cogn.	Chaetogastra laevis (Cogn.) P.J.F. Guim. & Michelang.
Tibouchina lanceolata	Cogn.	Chaetogastra pauciflora	P.J.F. Guim. & Michelang.	Tibouchina lanceolata Cogn.	Chaetogastra pauciflora P.J.F. Guim. & Michelang.
Tibouchina lancifolia	Wurdack	Chaetogastra lancifolia	(Wurdack) P.J.F. Guim. & Michelang.	Tibouchina lancifolia Wurdack	Chaetogastra lancifolia (Wurdack) P.J.F. Guim. & Michelang.
Tibouchina langsdorffiana	Baill.	Pleroma langsdorffianum	(Bonpl.) Triana	Tibouchina langsdorffiana Baill.	Pleroma langsdorffianum (Bonpl.) Triana
Tibouchina latibracteolata	P.G.Wilson	Chaetogastra latibracteolata	(P.G.Wilson) P.J.F. Guim. & Michelang.	Tibouchina latibracteolata P.G.Wilson	Chaetogastra latibracteolata (P.G.Wilson) P.J.F. Guim. & Michelang.
Tibouchina latifolia	(Naudin) Cogn.	Chaetogastra latifolia	(Naudin) P.J.F. Guim. & Michelang.	Tibouchina latifolia (Naudin) Cogn.	Chaetogastra latifolia (Naudin) P.J.F. Guim. & Michelang.
Tibouchina laxa	(Desr.) Cogn.	Chaetogastra laxa	(Desr.) P.J.F. Guim. & Michelang.	Tibouchina laxa (Desr.) Cogn.	Chaetogastra laxa (Desr.) P.J.F. Guim. & Michelang.
Tibouchina lepidota	(Bonpl.) Baill.	Andesanthus lepidotus	(Bonpl.) P.J.F.Guim. & Michelang.	Tibouchina lepidota (Bonpl.) Baill.	Andesanthus lepidotus (Bonpl.) P.J.F.Guim. & Michelang.
Tibouchina lepidota var. congestiflora	Bonpl.	Andesanthus lepidotus var. congestiflorus	(Bonpl.) P.J.F.Guim. & Michelang.	Tibouchina lepidota var. congestiflora Bonpl.	Andesanthus lepidotus var. congestiflorus (Bonpl.) P.J.F.Guim. & Michelang.
Tibouchina lhotzkyana	Cogn.	Pleroma lhotzkyana	(C. Presl.) Triana	Tibouchina lhotzkyana Cogn.	Pleroma lhotzkyana (C. Presl.) Triana
Tibouchina lilacina	Cogn.	Pleroma lilacinum	(Cogn.) P. J. F. Guim. & Michelang.	Tibouchina lilacina Cogn.	Pleroma lilacinum (Cogn.) P. J. F. Guim. & Michelang.
Tibouchina limae	Brade	Pleroma limae	(Brade) P. J. F. Guim. & Michelang.	Tibouchina limae Brade	Pleroma limae (Brade) P. J. F. Guim. & Michelang.
Tibouchina lithophila	Wurdack	Pleroma lithophilum	(Wurdack) P. J. F. Guim. & Michelang.	Tibouchina lithophila Wurdack	Pleroma lithophilum (Wurdack) P. J. F. Guim. & Michelang.
Tibouchina longifolia	(Vahl) Baill.	Chaetogastra longifolia	(Vahl.) DC.	Tibouchina longifolia (Vahl) Baill.	Chaetogastra longifolia (Vahl.) DC.
Tibouchina longipilosa	Cogn.	Chaetogastra longipilosa	(Cogn.) P.J.F. Guim. & Michelang.	Tibouchina longipilosa Cogn.	Chaetogastra longipilosa (Cogn.) P.J.F. Guim. & Michelang.
Tibouchina longisepala	Cogn.	Chaetogastra longisepala	(Cogn.) P.J.F. Guim. & Michelang.	Tibouchina longisepala Cogn.	Chaetogastra longisepala (Cogn.) P.J.F. Guim. & Michelang.
Tibouchina longistyla	(Cogn.) S.S. Renner	Chaetogastra longistyla	(Cogn.) P.J.F. Guim. & Michelang.	Tibouchina longistyla (Cogn.) S.S. Renner	Chaetogastra longistyla (Cogn.) P.J.F. Guim. & Michelang.
Tibouchina luetzelburgii	Markgr.	Pleroma luetzelburgii	(Markgr.) P. J. F. Guim. & Michelang.	Tibouchina luetzelburgii Markgr.	Pleroma luetzelburgii (Markgr.) P. J. F. Guim. & Michelang.
Tibouchina lutzii	Brade	Pleroma lutzii	(Brade) P. J. F. Guim. & Michelang.	Tibouchina lutzii Brade	Pleroma lutzii (Brade) P. J. F. Guim. & Michelang.
Tibouchina macrochiton	Cogn.	Pleroma macrochiton	(Mart. ex DC.) Triana	Tibouchina macrochiton Cogn.	Pleroma macrochiton (Mart. ex DC.) Triana
Tibouchina macvaughii	Todzia	Chaetogastra macvaughii	(Todzia) P.J.F. Guim. & Michelang.	Tibouchina macvaughii Todzia	Chaetogastra macvaughii (Todzia) P.J.F. Guim. & Michelang.
Tibouchina manicata	Cogn.	Pleroma manicatum	(Cogn.) P. J. F. Guim. & Michelang.	Tibouchina manicata Cogn.	Pleroma manicatum (Cogn.) P. J. F. Guim. & Michelang.
Tibouchina mariae	Wurdack	Chaetogastra mariae	(Wurdack) P.J.F. Guim. & Michelang.	Tibouchina mariae Wurdack	Chaetogastra mariae (Wurdack) P.J.F. Guim. & Michelang.
Tibouchina martialis	(Cham.) Cogn.	Pleroma martiale	(Cham.) Triana	Tibouchina martialis (Cham.) Cogn.	Pleroma martiale (Cham.) Triana
Tibouchina martiusiana	(DC.) Cogn.	Pleroma martiusianum	(DC.) P. J. F. Guim. & Michelang.	Tibouchina martiusiana (DC.) Cogn.	Pleroma martiusianum (DC.) P. J. F. Guim. & Michelang.
Tibouchina marumbiensis	Wurdack	Pleroma marumbiense	(Wurdack) P. J. F. Guim. & Michelang.	Tibouchina marumbiensis Wurdack	Pleroma marumbiense (Wurdack) P. J. F. Guim. & Michelang.
Tibouchina maximiliana	Baill.	Pleroma maximilianum	(DC.) Triana	Tibouchina maximiliana Baill.	Pleroma maximilianum (DC.) Triana
Tibouchina melanocalyx	R.Romero P.J.F.Guim. & Leoni	Pleroma melanocalyx	(R.Romero, P.J.F.Guim. & Leoni) P. J. F. Guim. & Michelang.	Tibouchina melanocalyx R.Romero P.J.F.Guim. & Leoni	Pleroma melanocalyx (R.Romero, P.J.F.Guim. & Leoni) P. J. F. Guim. & Michelang.
Tibouchina mello-barretoi	Brade	Pleroma mellobarretoi	(Brade) P. J. F. Guim. & Michelang.	Tibouchina mello-barretoi Brade	Pleroma mellobarretoi (Brade) P. J. F. Guim. & Michelang.
Tibouchina membranifolia	Cogn.	Chaetogastra membranifolia	(Cogn. & Rusby) P.J.F. Guim. & Michelang.	Tibouchina membranifolia Cogn.	Chaetogastra membranifolia (Cogn. & Rusby) P.J.F. Guim. & Michelang.
Tibouchina microphylla	Cogn.	Pleroma microphyllum	(Cogn. ex Schwacke) P. J. F. Guim. & Michelang.	Tibouchina microphylla Cogn.	Pleroma microphyllum (Cogn. ex Schwacke) P. J. F. Guim. & Michelang.
Tibouchina minor	Cogn.	Chaetogastra minor	(Cogn.) P.J.F. Guim. & Michelang.	Tibouchina minor Cogn.	Chaetogastra minor (Cogn.) P.J.F. Guim. & Michelang.
Tibouchina minutiflora	Cogn.	Pleroma minutiflorum	(Cogn.) P. J. F. Guim. & Michelang.	Tibouchina minutiflora Cogn.	Pleroma minutiflorum (Cogn.) P. J. F. Guim. & Michelang.
Tibouchina mollis	(Bonpl.) Cogn.	Chaetogastra mollis	(Bonpl.) DC.	Tibouchina mollis (Bonpl.) Cogn.	Chaetogastra mollis (Bonpl.) DC.
Tibouchina monticola	(Naudin) Cogn.	Chaetogastra monticola	(Naudin) P.J.F. Guim. & Michelang.	Tibouchina monticola (Naudin) Cogn.	Chaetogastra monticola (Naudin) P.J.F. Guim. & Michelang.
Tibouchina mosenii	Cogn.	Pleroma mosenii	(Cogn.) P. J. F. Guim. & Michelang.	Tibouchina mosenii Cogn.	Pleroma mosenii (Cogn.) P. J. F. Guim. & Michelang.
Tibouchina mouraei	Cogn.	Pleroma mourae	(Cogn.) P. J. F. Guim. & Michelang.	Tibouchina mouraei Cogn.	Pleroma mourae (Cogn.) P. J. F. Guim. & Michelang.
Tibouchina mutabilis	(Vell.) Cogn.	Pleroma mutabile	(Vell.) Triana	Tibouchina mutabilis (Vell.) Cogn.	Pleroma mutabile (Vell.) Triana
Tibouchina nanifolia	Todzia	Chaetogastra nanifolia	(Todzia) P.J.F. Guim. & Michelang.	Tibouchina nanifolia Todzia	Chaetogastra nanifolia (Todzia) P.J.F. Guim. & Michelang.
Tibouchina narinoensis	Wurdack	Andesanthus narinoensis	(Wurdack) P.J.F.Guim. & Michelang.	Tibouchina narinoensis Wurdack	Andesanthus narinoensis (Wurdack) P.J.F.Guim. & Michelang.
Tibouchina naudiniana	(Decne.) Cogn.	Chaetogastra naudiniana	Decne.	Tibouchina naudiniana (Decne.) Cogn.	Chaetogastra naudiniana Decne.
Tibouchina nitida	(Graham) Cogn.	Chaetogastra nitida	(Graham) P.J.F. Guim. & Michelang.	Tibouchina nitida (Graham) Cogn.	Chaetogastra nitida (Graham) P.J.F. Guim. & Michelang.
Tibouchina noblickii	Wurdack	Pleroma noblickii	(Wurdack) P. J. F. Guim. & Michelang.	Tibouchina noblickii Wurdack	Pleroma noblickii (Wurdack) P. J. F. Guim. & Michelang.
Tibouchina nodosa	Wurdack	Pleroma nodosum	(Wurdack ex Cogn.) P. J. F. Guim. & Michelang.	Tibouchina nodosa Wurdack	Pleroma nodosum (Wurdack ex Cogn.) P. J. F. Guim. & Michelang.
Tibouchina obtusifolia	Cogn.	Chaetogastra obtusifolia	(Cogn.) P.J.F. Guim. & Michelang.	Tibouchina obtusifolia Cogn.	Chaetogastra obtusifolia (Cogn.) P.J.F. Guim. & Michelang.
Tibouchina ochypetala	(Ruiz & Pav.) Baill.	Pleroma ochypetala	(Ruiz et Pavon) D. Don	Tibouchina ochypetala (Ruiz & Pav.) Baill.	Pleroma ochypetala (Ruiz et Pavon) D. Don
Tibouchina oligantha	Gleason	Chaetogastra oligantha	(Gleason) P.J.F. Guim. & Michelang.	Tibouchina oligantha Gleason	Chaetogastra oligantha (Gleason) P.J.F. Guim. & Michelang.
Tibouchina orbignyana	(Naudin) Cogn.	Chaetogastra orbignyana	(Naudin) P.J.F. Guim. & Michelang.	Tibouchina orbignyana (Naudin) Cogn.	Chaetogastra orbignyana (Naudin) P.J.F. Guim. & Michelang.
Tibouchina oreophila	Wurdack	Pleroma oreophilum	(Wurdack) P. J. F. Guim. & Michelang.	Tibouchina oreophila Wurdack	Pleroma oreophilum (Wurdack) P. J. F. Guim. & Michelang.
Tibouchina ornata	(Sw.) Baill.	Chaetogastra inconstans		Tibouchina ornata (Sw.) Baill.	Chaetogastra inconstans
Tibouchina oroensis	Gleason	Chaetogastra oroensis	(Gleason) P.J.F. Guim. & Michelang.	Tibouchina oroensis Gleason	Chaetogastra oroensis (Gleason) P.J.F. Guim. & Michelang.
Tibouchina paleacea	(Triana) Cogn.	Andesanthus paleaceus	(Triana ex Mart.) P.J.F.Guim. & Michelang.	Tibouchina paleacea (Triana) Cogn.	Andesanthus paleaceus (Triana ex Mart.) P.J.F.Guim. & Michelang.
Tibouchina pallida	Cogn.	Pleroma pallidum	(Cogn.) P. J. F. Guim. & Michelang.	Tibouchina pallida Cogn.	Pleroma pallidum (Cogn.) P. J. F. Guim. & Michelang.
Tibouchina panicularis	(Naudin) Britton ex Cogn.	Chaetogastra panicularis	Naudin	Tibouchina panicularis (Naudin) Britton ex Cogn.	Chaetogastra panicularis Naudin
Tibouchina paratropica	(Griseb.) Cogn.	Chaetogastra paratropica	(Griseb.) P.J.F. Guim. & Michelang.	Tibouchina paratropica (Griseb.) Cogn.	Chaetogastra paratropica (Griseb.) P.J.F. Guim. & Michelang.
Tibouchina parviflora	Cogn.	Chaetogastra parviflora	(Cogn.) P.J.F. Guim. & Michelang.	Tibouchina parviflora Cogn.	Chaetogastra parviflora (Cogn.) P.J.F. Guim. & Michelang.
Tibouchina patens	Todzia	Chaetogastra patens	(Todzia) P.J.F. Guim. & Michelang.	Tibouchina patens Todzia	Chaetogastra patens (Todzia) P.J.F. Guim. & Michelang.
Tibouchina pauloalvinii	Vinha	Pleroma pauloalvinii	(Vinha) P. J. F. Guim. & Michelang.	Tibouchina pauloalvinii Vinha	Pleroma pauloalvinii (Vinha) P. J. F. Guim. & Michelang.
Tibouchina pendula	Cogn.	Chaetogastra pendula	(Cogn.) P.J.F. Guim. & Michelang.	Tibouchina pendula Cogn.	Chaetogastra pendula (Cogn.) P.J.F. Guim. & Michelang.
Tibouchina pentamera	(Ule) J.F. Macbr.	Chaetogastra pentamera	(Ule) P.J.F. Guim. & Michelang.	Tibouchina pentamera (Ule) J.F. Macbr.	Chaetogastra pentamera (Ule) P.J.F. Guim. & Michelang.
Tibouchina pereirae	Brade & Markgr.	Pleroma pereirae	(Brade & Markgr.) P. J. F. Guim. & Michelang.	Tibouchina pereirae Brade & Markgr.	Pleroma pereirae (Brade & Markgr.) P. J. F. Guim. & Michelang.
Tibouchina pilosa	Cogn.	Pleroma pilosum	(Cogn.) P. J. F. Guim. & Michelang.	Tibouchina pilosa Cogn.	Pleroma pilosum (Cogn.) P. J. F. Guim. & Michelang.
Tibouchina pleromoides	J.F. Macbr.	Chaetogastra pleromoides	(Naudin) P.J.F. Guim. & Michelang.	Tibouchina pleromoides J.F. Macbr.	Chaetogastra pleromoides (Naudin) P.J.F. Guim. & Michelang.
Tibouchina pulcherrima	Gleason	Chaetogastra pulcherrima	(Gleason) P.J.F. Guim. & Michelang.	Tibouchina pulcherrima Gleason	Chaetogastra pulcherrima (Gleason) P.J.F. Guim. & Michelang.
Tibouchina purpurascens	Cogn.	Chaetogastra purpurascens	(Cogn.) P.J.F. Guim. & Michelang.	Tibouchina purpurascens Cogn.	Chaetogastra purpurascens (Cogn.) P.J.F. Guim. & Michelang.
Tibouchina purpusii	Brandegee	Chaetogastra purpusii	(Brandegee) P.J.F. Guim. & Michelang.	Tibouchina purpusii Brandegee	Chaetogastra purpusii (Brandegee) P.J.F. Guim. & Michelang.
Tibouchina quartzophila	Brade	Pleroma quartzophilum	(Brade) P. J. F. Guim. & Michelang.	Tibouchina quartzophila Brade	Pleroma quartzophilum (Brade) P. J. F. Guim. & Michelang.
Tibouchina raddiana	(DC.) Cogn.	Pleroma raddianum	(DC.) Gardner	Tibouchina raddiana (DC.) Cogn.	Pleroma raddianum (DC.) Gardner
Tibouchina radula	Markgr.	Pleroma radula	(Markgr.) P. J. F. Guim. & Michelang.	Tibouchina radula Markgr.	Pleroma radula (Markgr.) P. J. F. Guim. & Michelang.
Tibouchina ramboi	Brade	Pleroma ramboi	(Brade) P. J. F. Guim. & Michelang.	Tibouchina ramboi Brade	Pleroma ramboi (Brade) P. J. F. Guim. & Michelang.
Tibouchina rediviva	(Triana) Cogn.	Pleroma redivivum	O.Berg ex Triana	Tibouchina rediviva (Triana) Cogn.	Pleroma redivivum O.Berg ex Triana
Tibouchina regeliana	Cogn.	Pleroma regelianum	(Cogn.) P. J. F. Guim. & Michelang.	Tibouchina regeliana Cogn.	Pleroma regelianum (Cogn.) P. J. F. Guim. & Michelang.
Tibouchina regnellii	Cogn.	Pleroma andersregnellii	P.J.F.Guim. & Michelang.	Tibouchina regnellii Cogn.	Pleroma andersregnellii P.J.F.Guim. & Michelang.
Tibouchina reitzii	Brade	Pleroma reitzii	(Brade) P. J. F. Guim. & Michelang.	Tibouchina reitzii Brade	Pleroma reitzii (Brade) P. J. F. Guim. & Michelang.
Tibouchina repens	Wurdack	Chaetogastra repens	(Wurdack) P.J.F. Guim. & Michelang.	Tibouchina repens Wurdack	Chaetogastra repens (Wurdack) P.J.F. Guim. & Michelang.
Tibouchina rhynchantherifolia	Cogn.	Chaetogastra rhynchantherifolia	(Cogn.) P.J.F. Guim. & Michelang.	Tibouchina rhynchantherifolia Cogn.	Chaetogastra rhynchantherifolia (Cogn.) P.J.F. Guim. & Michelang.
Tibouchina riedeliana	Cogn.	Pleroma riedelianum	(Cogn.) P. J. F. Guim. & Michelang.	Tibouchina riedeliana Cogn.	Pleroma riedelianum (Cogn.) P. J. F. Guim. & Michelang.
Tibouchina rigidula	(Naudin) Wurdack	Pleroma rigidulum	((Naudin) Wurdack) P. J. F. Guim. & Michelang.	Tibouchina rigidula (Naudin) Wurdack	Pleroma rigidulum ((Naudin) Wurdack) P. J. F. Guim. & Michelang.
Tibouchina riparia	Markgr.	Pleroma riparium	(Markgr.) P. J. F. Guim. & Michelang.	Tibouchina riparia Markgr.	Pleroma riparium (Markgr.) P. J. F. Guim. & Michelang.
Tibouchina robusta	Cogn.	Pleroma robustm	(Cogn.) P. J. F. Guim. & Michelang.	Tibouchina robusta Cogn.	Pleroma robustm (Cogn.) P. J. F. Guim. & Michelang.
Tibouchina rojasii	Cogn.	Chaetogastra rojasii	(Cogn.) P.J.F. Guim. & Michelang.	Tibouchina rojasii Cogn.	Chaetogastra rojasii (Cogn.) P.J.F. Guim. & Michelang.
Tibouchina roseotincta	Todzia	Chaetogastra roseotincta	(Todzia) P.J.F. Guim. & Michelang.	Tibouchina roseotincta Todzia	Chaetogastra roseotincta (Todzia) P.J.F. Guim. & Michelang.
Tibouchina rubrobracteata	R. Romero & P.J.F.Guim.	Pleroma rubrobracteatum	(R.Romero & P.J.F.Guim.) P. J. F. Guim. & Michelang.	Tibouchina rubrobracteata R. Romero & P.J.F.Guim.	Pleroma rubrobracteatum (R.Romero & P.J.F.Guim.) P. J. F. Guim. & Michelang.
Tibouchina rufipilis	(Schltdl.) Cogn.	Chaetogastra rufipilis	(Schltdl.) Walp.	Tibouchina rufipilis (Schltdl.) Cogn.	Chaetogastra rufipilis (Schltdl.) Walp.
Tibouchina rupestris	Cogn.	Chaetogastra rupestris	(Cogn.) P.J.F. Guim. & Michelang.	Tibouchina rupestris Cogn.	Chaetogastra rupestris (Cogn.) P.J.F. Guim. & Michelang.
Tibouchina rupicola	Hoehne	Pleroma rupicola	(Hoehne) P. J. F. Guim. & Michelang.	Tibouchina rupicola Hoehne	Pleroma rupicola (Hoehne) P. J. F. Guim. & Michelang.
Tibouchina rusbyi	Cogn.	Chaetogastra rusbyi	(Cogn.) P.J.F. Guim. & Michelang.	Tibouchina rusbyi Cogn.	Chaetogastra rusbyi (Cogn.) P.J.F. Guim. & Michelang.
Tibouchina salviifolia	Cogn.	Pleroma salviaefolium	(Cham.) Triana	Tibouchina salviifolia Cogn.	Pleroma salviaefolium (Cham.) Triana
Tibouchina sandiensis	Wurdack	Chaetogastra sandiensis	(Wurdack) P.J.F. Guim. & Michelang.	Tibouchina sandiensis Wurdack	Chaetogastra sandiensis (Wurdack) P.J.F. Guim. & Michelang.
Tibouchina saxicola	F.S. Mey., P.J.F.Guim. & R.Goldenb.	Chaetogastra saxicola	(F.S.Mey., P.J.F.Guim. & R.Goldenb.) P.J.F. Guim. & Michelang.	Tibouchina saxicola F.S. Mey., P.J.F.Guim. & R.Goldenb.	Chaetogastra saxicola (F.S.Mey., P.J.F.Guim. & R.Goldenb.) P.J.F. Guim. & Michelang.
Tibouchina saxosa	Gleason	Chaetogastra saxosa	(Gleason) P.J.F. Guim. & Michelang.	Tibouchina saxosa Gleason	Chaetogastra saxosa (Gleason) P.J.F. Guim. & Michelang.
Tibouchina scaberrima	Cogn.	Pleroma scaberrimum	Triana	Tibouchina scaberrima Cogn.	Pleroma scaberrimum Triana
Tibouchina scabriuscula	(Schltdl.) Cogn.	Chaetogastra scabriuscula	(Schlecht.) P.J.F. Guim. & Michelang.	Tibouchina scabriuscula (Schltdl.) Cogn.	Chaetogastra scabriuscula (Schlecht.) P.J.F. Guim. & Michelang.
Tibouchina schenckii	Cogn.	Pleroma schenckii	(Cogn.) P. J. F. Guim. & Michelang.	Tibouchina schenckii Cogn.	Pleroma schenckii (Cogn.) P. J. F. Guim. & Michelang.
Tibouchina schiedeana	(Schltdl. & Cham.) Cogn.	Chaetogastra schiedeana	(Schltdl. & Cham.) Walp.	Tibouchina schiedeana (Schltdl. & Cham.) Cogn.	Chaetogastra schiedeana (Schltdl. & Cham.) Walp.
Tibouchina schwackei	Cogn.	Pleroma schwackei	(Cogn.) P. J. F. Guim. & Michelang.	Tibouchina schwackei Cogn.	Pleroma schwackei (Cogn.) P. J. F. Guim. & Michelang.
Tibouchina sebastianopolitana	(Raddi) Cogn.	Chaetogastra sebastianapolitana	(Raddi) P.J.F. Guim. & Michelang.	Tibouchina sebastianopolitana (Raddi) Cogn.	Chaetogastra sebastianapolitana (Raddi) P.J.F. Guim. & Michelang.
Tibouchina sellowiana	(Cham.) Cogn.	Pleroma sellowianum	(Cham) P. J. F. Guim. & Michelang.	Tibouchina sellowiana (Cham.) Cogn.	Pleroma sellowianum (Cham) P. J. F. Guim. & Michelang.
Tibouchina semidecandra	(Mart. & Schrank ex DC.) Cogn.	Pleroma semidecandrum	(Schrank et Mart. ex DC.) Triana	Tibouchina semidecandra (Mart. & Schrank ex DC.) Cogn.	Pleroma semidecandrum (Schrank et Mart. ex DC.) Triana
Tibouchina sericea	de Santiago	Chaetogastra sericea	(de Santiago) P.J.F. Guim. & Michelang.	Tibouchina sericea de Santiago	Chaetogastra sericea (de Santiago) P.J.F. Guim. & Michelang.
Tibouchina setoso-ciliata	Cogn.	Pleroma setosociliatum	(Cogn.) F.S.Mey. & F.B.Matos	Tibouchina setoso-ciliata Cogn.	Pleroma setosociliatum (Cogn.) F.S.Mey. & F.B.Matos
Tibouchina silvestris	Todzia & Almeda	Andesanthus silvestris	(Todzia & Almeda) P.J.F.Guim.& Michelang.	Tibouchina silvestris Todzia & Almeda	Andesanthus silvestris (Todzia & Almeda) P.J.F.Guim.& Michelang.
Tibouchina simplicicaulis	Cogn.	Chaetogastra simplicicaulis	(Naudin) P.J.F. Guim. & Michelang.	Tibouchina simplicicaulis Cogn.	Chaetogastra simplicicaulis (Naudin) P.J.F. Guim. & Michelang.
Tibouchina sinaloensis	Todzia	Chaetogastra sinaloensis	(Todzia) P.J.F. Guim. & Michelang.	Tibouchina sinaloensis Todzia	Chaetogastra sinaloensis (Todzia) P.J.F. Guim. & Michelang.
Tibouchina solmsii	Cogn.	Chaetogastra solmsii	(Cogn.) P.J.F. Guim. & Michelang.	Tibouchina solmsii Cogn.	Chaetogastra solmsii (Cogn.) P.J.F. Guim. & Michelang.
Tibouchina stellipilis	Wurdack	Pleroma stellipile	(Wurdack) P. J. F. Guim. & Michelang.	Tibouchina stellipilis Wurdack	Pleroma stellipile (Wurdack) P. J. F. Guim. & Michelang.
Tibouchina stenocarpa	(DC.) Cogn.	Pleroma stenocarpa	(Schrank et Mart. ex DC.) Triana	Tibouchina stenocarpa (DC.) Cogn.	Pleroma stenocarpa (Schrank et Mart. ex DC.) Triana
Tibouchina stenopetala	Cogn.	Chaetogastra stenopetala	(Triana) P.J.F. Guim. & Michelang.	Tibouchina stenopetala Cogn.	Chaetogastra stenopetala (Triana) P.J.F. Guim. & Michelang.
Tibouchina stenophylla	Cogn.	Chaetogastra stenophylla	(Cogn.) P.J.F. Guim. & Michelang.	Tibouchina stenophylla Cogn.	Chaetogastra stenophylla (Cogn.) P.J.F. Guim. & Michelang.
Tibouchina stipulacea	Vinha	Pleroma stipulaceum	(Guimarães da Vinha) P. J. F. Guim. & Michelang.	Tibouchina stipulacea Vinha	Pleroma stipulaceum (Guimarães da Vinha) P. J. F. Guim. & Michelang.
Tibouchina strigosa	(Rich.) Cogn	Chaetogastra strigosa	(Rich.) DC	Tibouchina strigosa (Rich.) Cogn	Chaetogastra strigosa (Rich.) DC
Tibouchina subglabra	Wurdack	Pleroma subglabrum	(Wurdack) P. J. F. Guim. & Michelang.	Tibouchina subglabra Wurdack	Pleroma subglabrum (Wurdack) P. J. F. Guim. & Michelang.
Tibouchina taperoensis	Wurdack	Pleroma taperoense	(Wurdack) P. J. F. Guim. & Michelang.	Tibouchina taperoensis Wurdack	Pleroma taperoense (Wurdack) P. J. F. Guim. & Michelang.
Tibouchina tedescoi	Meirelles, L.Kollmann & R.Goldenb.	Pleroma tedescoi	(Meirelles, L.Kollmann & R.Goldenb.) P.J.F. Guim. & Michelang.	Tibouchina tedescoi Meirelles, L.Kollmann & R.Goldenb.	Pleroma tedescoi (Meirelles, L.Kollmann & R.Goldenb.) P.J.F. Guim. & Michelang.
Tibouchina tetrapetala	Cogn.	Chaetogastra tetrapetala	(Cogn.) P.J.F. Guim. & Michelang.	Tibouchina tetrapetala Cogn.	Chaetogastra tetrapetala (Cogn.) P.J.F. Guim. & Michelang.
Tibouchina thereminiana	Cogn.	Pleroma thereminianum	(DC.) Triana	Tibouchina thereminiana Cogn.	Pleroma thereminianum (DC.) Triana
Tibouchina thulia	Todzia	Chaetogastra thulia	(Todzia) P.J.F. Guim. & Michelang.	Tibouchina thulia Todzia	Chaetogastra thulia (Todzia) P.J.F. Guim. & Michelang.
Tibouchina tomentulosa	Wurdack	Pleroma tomentulosum	(Wurdack) P. J. F. Guim. & Michelang.	Tibouchina tomentulosa Wurdack	Pleroma tomentulosum (Wurdack) P. J. F. Guim. & Michelang.
Tibouchina tortuosa	(Bonpl.) Almeda	Chaetogastra tortuosa	(Bonpl.) DC.	Tibouchina tortuosa (Bonpl.) Almeda	Chaetogastra tortuosa (Bonpl.) DC.
Tibouchina trichopoda	(DC.) Baill.	Pleroma trichopodum	DC.	Tibouchina trichopoda (DC.) Baill.	Pleroma trichopodum DC.
Tibouchina triflora	Gleason	Chaetogastra triflora	(Gleason) P. J. F. Guim. & Michelang.	Tibouchina triflora Gleason	Chaetogastra triflora (Gleason) P. J. F. Guim. & Michelang.
Tibouchina trinitensis	Cogn.	Chaetogastra trinitensis	(Cogn.) P.J.F. Guim. & Michelang.	Tibouchina trinitensis Cogn.	Chaetogastra trinitensis (Cogn.) P.J.F. Guim. & Michelang.
Tibouchina tuberosa	Cogn.	Pleroma tuberosum	Gardner ex Triana	Tibouchina tuberosa Cogn.	Pleroma tuberosum Gardner ex Triana
Tibouchina urbanii	Cogn.	Chaetogastra urbanii	(Cogn.) P.J.F. Guim. & Michelang.	Tibouchina urbanii Cogn.	Chaetogastra urbanii (Cogn.) P.J.F. Guim. & Michelang.
Tibouchina urceolaris	(Schrank & Mart. ex DC.) Cogn	Pleroma urceolare	(Schrank & Mart. ex DC.) Triana	Tibouchina urceolaris (Schrank & Mart. ex DC.) Cogn	Pleroma urceolare (Schrank & Mart. ex DC.) Triana
Tibouchina ursina	(Cham.) Cogn.	Pleroma ursinum	(Cham.) Triana	Tibouchina ursina (Cham.) Cogn.	Pleroma ursinum (Cham.) Triana
Tibouchina urvilleana	(DC.) Cogn.	Pleroma urvilleanum	(DC.) P.J.F.Guim. & Michelang.	Tibouchina urvilleana (DC.) Cogn.	Pleroma urvilleanum (DC.) P.J.F.Guim. & Michelang.
Tibouchina velutina	Cogn.	Pleroma velutinum	(Naud.) Triana	Tibouchina velutina Cogn.	Pleroma velutinum (Naud.) Triana
Tibouchina venosa	Gleason	Chaetogastra venosa	(Gleason) P.J.F. Guim. & Michelang.	Tibouchina venosa Gleason	Chaetogastra venosa (Gleason) P.J.F. Guim. & Michelang.
Tibouchina versicolor	Cogn.	Chaetogastra versicolor	(Lindl.) P.J.F. Guim. & Michelang.	Tibouchina versicolor Cogn.	Chaetogastra versicolor (Lindl.) P.J.F. Guim. & Michelang.
Tibouchina villosissima	Cogn.	Pleroma villosissimum	Mart. ex.Triana	Tibouchina villosissima Cogn.	Pleroma villosissimum Mart. ex.Triana
Tibouchina viminea	Cogn.	Pleroma vimineum	(D. Don) D. Don	Tibouchina viminea Cogn.	Pleroma vimineum (D. Don) D. Don
Tibouchina violacea	Cogn.	Chaetogastra violacea	(Cogn.) P.J.F. Guim. & Michelang.	Tibouchina violacea Cogn.	Chaetogastra violacea (Cogn.) P.J.F. Guim. & Michelang.
Tibouchina virgata	Cogn.	Pleroma virgatum	Gardner	Tibouchina virgata Cogn.	Pleroma virgatum Gardner
Tibouchina wasshausenii	Wurdack	Chaetogastra wasshausenii	(Wurdack) P.J.F. Guim. & Michelang.	Tibouchina wasshausenii Wurdack	Chaetogastra wasshausenii (Wurdack) P.J.F. Guim. & Michelang.
Tibouchina weberbaueri	Cogn.	Chaetogastra weberbaueri	(Cogn.) P.J.F. Guim. & Michelang.	Tibouchina weberbaueri Cogn.	Chaetogastra weberbaueri (Cogn.) P.J.F. Guim. & Michelang.
Tibouchina wurdackii	Almeda & Todzia	Andesanthus wurdackii	(Almeda & Todzia) P.J.F.Guim. & Michelang.	Tibouchina wurdackii Almeda & Todzia	Andesanthus wurdackii (Almeda & Todzia) P.J.F.Guim. & Michelang.
Tibouchinopsis glutinosa	Markgr.	Pleroma glutinosum	(Markgr.) P. J. F. Guim. & Michelang.	Tibouchinopsis glutinosa Markgr.	Pleroma glutinosum (Markgr.) P. J. F. Guim. & Michelang.
Tibouchinopsis mirabilis	Brade & Markgr.	Pleroma mirabile	(Brade & Markgr.) P. J. F. Guim. & Michelang.	Tibouchinopsis mirabilis Brade & Markgr.	Pleroma mirabile (Brade & Markgr.) P. J. F. Guim. & Michelang.
Tococa aristata	Benth.	Miconia tocoaristata	Michelang.	Tococa aristata Benth.	Miconia tocoaristata Michelang.
Tococa bolivarensis	Gleason	Miconia canaimana	Michelang.	Tococa bolivarensis Gleason	Miconia canaimana Michelang.
Tococa broadwayi	Urb.	Miconia broadwayii	(Urb.) Michelang.	Tococa broadwayi Urb.	Miconia broadwayii (Urb.) Michelang.
Tococa bullifera	Mart. & Schrank ex DC.	Miconia bullifera	(Mart. Ex. Schrank ex DC.) Michelang.	Tococa bullifera Mart. & Schrank ex DC.	Miconia bullifera (Mart. Ex. Schrank ex DC.) Michelang.
Tococa capitata	Trail ex Cogn.	Miconia tococapitata	Michelang.	Tococa capitata Trail ex Cogn.	Miconia tococapitata Michelang.
Tococa caquetana	Sprague	Miconia caquetana	(Sprague) Michelang.	Tococa caquetana Sprague	Miconia caquetana (Sprague) Michelang.
Tococa carolensis	Gleason	Miconia carolensis	(Gleason) Michelang.	Tococa carolensis Gleason	Miconia carolensis (Gleason) Michelang.
Tococa caryophyllaea	(DC.) S.S.Renner	Miconia caryophyllea	(DC.) Triana	Tococa caryophyllaea (DC.) S.S.Renner	Miconia caryophyllea (DC.) Triana
Tococa caudata	Markgr.	Miconia tococaudata	Michelang.	Tococa caudata Markgr.	Miconia tococaudata Michelang.
Tococa ciliata	Triana	Miconia tocociliata	Michelang.	Tococa ciliata Triana	Miconia tocociliata Michelang.
Tococa cinnamomea		Miconia tococinnamomea	Michelang.	Tococa cinnamomea	Miconia tococinnamomea Michelang.
Tococa cordata	O.Berg ex Triana	Miconia tococordata	Michelang.	Tococa cordata O.Berg ex Triana	Miconia tococordata Michelang.
Tococa coronata	Benth.	Miconia tococoronata	Michelang.	Tococa coronata Benth.	Miconia tococoronata Michelang.
Tococa costoides	Michelangeli	Miconia costoides	(Michelang.) Michelang.	Tococa costoides Michelangeli	Miconia costoides (Michelang.) Michelang.
Tococa croatii	Almeda	Miconia croatii	(Almeda) Michelang. & Almeda	Tococa croatii Almeda	Miconia croatii (Almeda) Michelang. & Almeda
Tococa desiliens	Gleason	Miconia desiliens	(Gleason) Michelang.	Tococa desiliens Gleason	Miconia desiliens (Gleason) Michelang.
Tococa erioneura	(Cogn.) Wurdack	Miconia erioneura	Cogn.	Tococa erioneura (Cogn.) Wurdack	Miconia erioneura Cogn.
Tococa erythrophylla	(Ule) Wurdack	Miconia erythrophylla	Ule	Tococa erythrophylla (Ule) Wurdack	Miconia erythrophylla Ule
Tococa filiformis	(Gleason) Wurdack	Miconia filiformis	(Gleason) Michelang.	Tococa filiformis (Gleason) Wurdack	Miconia filiformis (Gleason) Michelang.
Tococa gonoptera	Gleason	Miconia gonoptera	(Gleason) Michelang.	Tococa gonoptera Gleason	Miconia gonoptera (Gleason) Michelang.
Tococa hirta	O.Berg ex Triana	Miconia tocohirta	Michelang.	Tococa hirta O.Berg ex Triana	Miconia tocohirta Michelang.
Tococa lancifolia	Spruce ex Triana	Miconia lancifolia	(Spruce ex Triana) Michelang.	Tococa lancifolia Spruce ex Triana	Miconia lancifolia (Spruce ex Triana) Michelang.
Tococa leticiana	Michelangeli	Miconia leticiana	(Michelang.) Michelang.	Tococa leticiana Michelangeli	Miconia leticiana (Michelang.) Michelang.
Tococa liesneri	Wurdack	Miconia ronliesneri	Michelang.	Tococa liesneri Wurdack	Miconia ronliesneri Michelang.
Tococa macrophysca	Spruce ex Triana	Miconia macrophysca	(Spruce ex Triana) Michelang.	Tococa macrophysca Spruce ex Triana	Miconia macrophysca (Spruce ex Triana) Michelang.
Tococa macroptera	Naudin	Miconia macroptera	(Naudin) Michelang.	Tococa macroptera Naudin	Miconia macroptera (Naudin) Michelang.
Tococa macrosperma	Mart.	Miconia macrosperma	(Mart) Michelang.	Tococa macrosperma Mart.	Miconia macrosperma (Mart) Michelang.
Tococa meridensis	Wurdack	Miconia norandina	Michelang.	Tococa meridensis Wurdack	Miconia norandina Michelang.
Tococa nitens	(Benth.) Triana	Miconia nitens	Benth.	Tococa nitens (Benth.) Triana	Miconia nitens Benth.
Tococa obovata	Gleason	Miconia tocobovata	Michelang.	Tococa obovata Gleason	Miconia tocobovata Michelang.
Tococa oligantha	Gleason	Miconia setimarginata	Pittier	Tococa oligantha Gleason	Miconia setimarginata Pittier
Tococa pachystachya	Wurdack	Miconia pachystachya	(Wurdack) Michelang.	Tococa pachystachya Wurdack	Miconia pachystachya (Wurdack) Michelang.
Tococa pauciflora	Spruce ex Triana	Miconia tocopauciflora	Michelang.	Tococa pauciflora Spruce ex Triana	Miconia tocopauciflora Michelang.
Tococa perclara	Wurdack	Miconia perclara	(Wurdack) Michelang.	Tococa perclara Wurdack	Miconia perclara (Wurdack) Michelang.
Tococa platyphylla	Benth.	Miconia platyphylla	(Benth.) L.O.Williams	Tococa platyphylla Benth.	Miconia platyphylla (Benth.) L.O.Williams
Tococa quadrialata	(Naudin) J.F.Macbr.	Miconia microphysca	Michelang.	Tococa quadrialata (Naudin) J.F.Macbr.	Miconia microphysca Michelang.
Tococa racemifera	Wurdack	Miconia tocoracemifera	Michelang.	Tococa racemifera Wurdack	Miconia tocoracemifera Michelang.
Tococa raggiana	Michelangeli	Miconia raggiana	(Michelang.) Michelang.	Tococa raggiana Michelangeli	Miconia raggiana (Michelang.) Michelang.
Tococa rotundifolia	(Triana) Wurdack	Miconia rubripetala	Michelang.	Tococa rotundifolia (Triana) Wurdack	Miconia rubripetala Michelang.
Tococa setifera	Pilg.	Miconia setifera	(Pilg.) Michelang.	Tococa setifera Pilg.	Miconia setifera (Pilg.) Michelang.
Tococa spadiciflora	Triana	Miconia spadiciflora	(Triana) Michelang.	Tococa spadiciflora Triana	Miconia spadiciflora (Triana) Michelang.
Tococa stellata	Gleason	Miconia stenoptera	(Gleason) Michelang.	Tococa stellata Gleason	Miconia stenoptera (Gleason) Michelang.
Tococa stephanotricha	Naudin	Miconia stephanotricha	(Naudin) Michelang.	Tococa stephanotricha Naudin	Miconia stephanotricha (Naudin) Michelang.
Tococa subciliata	(DC.) Triana	Miconia subciliata	DC.	Tococa subciliata (DC.) Triana	Miconia subciliata DC.
Tococa symphyandra	(Triana) Cogn.	Miconia symphyadra	Triana	Tococa symphyandra (Triana) Cogn.	Miconia symphyadra Triana
Tococa tepuiensis	Wurdack	Miconia tepuiensis	(Wurdack) Michelang	Tococa tepuiensis Wurdack	Miconia tepuiensis (Wurdack) Michelang
Tococa undabunda	J. F.Macbr.	Miconia undabunda	(J. F. Macbr.) Michelang.	Tococa undabunda J. F.Macbr.	Miconia undabunda (J. F. Macbr.) Michelang.
Topobea acuminata	Wurdack	Blakea acuminata	(Wurdack) Penneys & Judd	Topobea acuminata Wurdack	Blakea acuminata (Wurdack) Penneys & Judd
Topobea adscendens	E.Cotton & Matezki	Blakea adscendens	(E. Cotton & Matezki) Penneys & Judd	Topobea adscendens E.Cotton & Matezki	Blakea adscendens (E. Cotton & Matezki) Penneys & Judd
Topobea aeruginosa	(Standl.) L.O.Williams	Blakea aeruginosa	Standl.	Topobea aeruginosa (Standl.) L.O.Williams	Blakea aeruginosa Standl.
Topobea albertiae	Wurdack	Blakea albertiae	(Wurdack) Penneys & Judd	Topobea albertiae Wurdack	Blakea albertiae (Wurdack) Penneys & Judd
Topobea alternifolia	Gleason	Blakea alternifolia	(Gleason) Gleason	Topobea alternifolia Gleason	Blakea alternifolia (Gleason) Gleason
Topobea amplifolia	Almeda	Blakea amplifolia	(Almeda) Penneys & Almeda	Topobea amplifolia Almeda	Blakea amplifolia (Almeda) Penneys & Almeda
Topobea andreana	Cogn.	Blakea pectinata	Penneys, Phytoneuron 0.916666666666667 4	Topobea andreana Cogn.	Blakea pectinata Penneys, Phytoneuron 0.916666666666667 4
Topobea anisophylla	Triana	Blakea anisophylla	(Triana) Baill.	Topobea anisophylla Triana	Blakea anisophylla (Triana) Baill.
Topobea arboricola	Almeda	Blakea arboricola	(Almeda) Penneys & Almeda	Topobea arboricola Almeda	Blakea arboricola (Almeda) Penneys & Almeda
Topobea asplundii	Wurdack	Blakea asplundii	(Wurdack) Penneys & Judd	Topobea asplundii Wurdack	Blakea asplundii (Wurdack) Penneys & Judd
Topobea barbata	Gleason	Blakea barbata	(Gleason) Penneys & Judd	Topobea barbata Gleason	Blakea barbata (Gleason) Penneys & Judd
Topobea brachyura	(Gleason) Wurdack	Blakea brachyura	Gleason	Topobea brachyura (Gleason) Wurdack	Blakea brachyura Gleason
Topobea brenesii	Standl.	Blakea brenesii	(Standl.) Penneys & Almeda	Topobea brenesii Standl.	Blakea brenesii (Standl.) Penneys & Almeda
Topobea brevibractea	Gleason	Blakea brevibractea	(Gleason) Penneys & Judd	Topobea brevibractea Gleason	Blakea brevibractea (Gleason) Penneys & Judd
Topobea bullata	E.Cotton & Matezki	Blakea bullata	(E.Cotton & Matezki) Penneys & Judd	Topobea bullata E.Cotton & Matezki	Blakea bullata (E.Cotton & Matezki) Penneys & Judd
Topobea calcarata	L.Uribe	Blakea calcarata	(L. Uribe) Penneys & Judd	Topobea calcarata L.Uribe	Blakea calcarata (L. Uribe) Penneys & Judd
Topobea caliginosa	Almeda	Blakea micrantha	Almeda	Topobea caliginosa Almeda	Blakea micrantha Almeda
Topobea calophylla	Almeda	Blakea calophylla	(Almeda) Penneys & Almeda	Topobea calophylla Almeda	Blakea calophylla (Almeda) Penneys & Almeda
Topobea calycularis	Naudin	Blakea calycularis	(Naudin) Penneys & Almeda	Topobea calycularis Naudin	Blakea calycularis (Naudin) Penneys & Almeda
Topobea castanedae	Wurdack	Blakea castanedae	(Wurdack) Penneys & Judd	Topobea castanedae Wurdack	Blakea castanedae (Wurdack) Penneys & Judd
Topobea caudata	Wurdack	Blakea horologica	Penneys & Judd	Topobea caudata Wurdack	Blakea horologica Penneys & Judd
Topobea ciliata	Cogn.	Blakea ciliata	Markgr.	Topobea ciliata Cogn.	Blakea ciliata Markgr.
Topobea cordata	Gleason	Blakea cordata	(Gleason) Penneys & Almeda	Topobea cordata Gleason	Blakea cordata (Gleason) Penneys & Almeda
Topobea crassifolia	(Almeda) Almeda	Blakea crassifolia	Almeda	Topobea crassifolia (Almeda) Almeda	Blakea crassifolia Almeda
Topobea cutucuensis	Wurdack	Blakea cutucuensis	(L. Uribe) Penneys & Judd	Topobea cutucuensis Wurdack	Blakea cutucuensis (L. Uribe) Penneys & Judd
Topobea dimorphophylla	Almeda	Blakea dimorphophylla	(Almeda) Penneys & Almeda	Topobea dimorphophylla Almeda	Blakea dimorphophylla (Almeda) Penneys & Almeda
Topobea discolor	Hochr.	Blakea discolor	(Hochr.) Penneys & Judd,	Topobea discolor Hochr.	Blakea discolor (Hochr.) Penneys & Judd,
Topobea dodsonorum	Wurdack	Blakea dodsoniorum	(Wurdack) Penneys & Almeda	Topobea dodsonorum Wurdack	Blakea dodsoniorum (Wurdack) Penneys & Almeda
Topobea eplingii	Wurdack	Blakea eplingii	(Wurdack) Penneys & Judd,	Topobea eplingii Wurdack	Blakea eplingii (Wurdack) Penneys & Judd,
Topobea ferruginea	Gleason	Blakea ferruginea	(Gleason) Penneys & Judd	Topobea ferruginea Gleason	Blakea ferruginea (Gleason) Penneys & Judd
Topobea fragrantissima	Almeda	Blakea fragrantissima	(Almeda) Penneys & Almeda	Topobea fragrantissima Almeda	Blakea fragrantissima (Almeda) Penneys & Almeda
Topobea gerardoana	Almeda	Blakea gerardoana	(Almeda) Penneys & Almeda	Topobea gerardoana Almeda	Blakea gerardoana (Almeda) Penneys & Almeda
Topobea glaberrima	Triana	Blakea glaberrima	(Triana) Penneys & Judd	Topobea glaberrima Triana	Blakea glaberrima (Triana) Penneys & Judd
Topobea glabrescens	Triana	Blakea cuprina	Penneys & Judd	Topobea glabrescens Triana	Blakea cuprina Penneys & Judd
Topobea gracilis	Triana	Blakea clavata	Penneys & Judd	Topobea gracilis Triana	Blakea clavata Penneys & Judd
Topobea hexandra	Almeda	Blakea hexandra	(Almeda) Penneys & Almeda	Topobea hexandra Almeda	Blakea hexandra (Almeda) Penneys & Almeda
Topobea induta	Markgr.	Blakea induta	(Markgr.) Penneys & Judd	Topobea induta Markgr.	Blakea induta (Markgr.) Penneys & Judd
Topobea inflata	Triana	Blakea inflata	(Triana) Penneys & Judd	Topobea inflata Triana	Blakea inflata (Triana) Penneys & Judd
Topobea insignis	Triana	Blakea insignis	(Triana) Penneys & Judd	Topobea insignis Triana	Blakea insignis (Triana) Penneys & Judd
Topobea intricata	Almeda	Blakea intricata	(Almeda) Penneys & Almeda	Topobea intricata Almeda	Blakea intricata (Almeda) Penneys & Almeda
Topobea killipii	Wurdack	Blakea killipii	(Wurdack) Penneys & Judd	Topobea killipii Wurdack	Blakea killipii (Wurdack) Penneys & Judd
Topobea laevigata	(D.Don) Naudin	Blakea laevigata	D. Don	Topobea laevigata (D.Don) Naudin	Blakea laevigata D. Don
Topobea lentii	Almeda	Blakea lentii	(Almeda) Penneys & Almeda	Topobea lentii Almeda	Blakea lentii (Almeda) Penneys & Almeda
Topobea longiloba	Wurdack	Blakea longiloba	(Wurdack) Penneys & Judd	Topobea longiloba Wurdack	Blakea longiloba (Wurdack) Penneys & Judd
Topobea longisepala	Gleason	Blakea longisepala	(Gleason) Penneys & Judd	Topobea longisepala Gleason	Blakea longisepala (Gleason) Penneys & Judd
Topobea macbrydei	Wurdack	Blakea macbrydei	(Wurdack) Penneys & Judd	Topobea macbrydei Wurdack	Blakea macbrydei (Wurdack) Penneys & Judd
Topobea maguirei	Wurdack	Blakea maguirei	(Wurdack) Penneys & Judd	Topobea maguirei Wurdack	Blakea maguirei (Wurdack) Penneys & Judd
Topobea maurofernandeziana	Cogn.	Blakea maurofernandeziana	(Cogn.) Penneys & Almeda	Topobea maurofernandeziana Cogn.	Blakea maurofernandeziana (Cogn.) Penneys & Almeda
Topobea mcphersonii	Almeda	Blakea mcphersonii	(Almeda) Penneys & Almeda	Topobea mcphersonii Almeda	Blakea mcphersonii (Almeda) Penneys & Almeda
Topobea micrantha	Pittier	Miconia concinna	Almeda	Topobea micrantha Pittier	Miconia concinna Almeda
Topobea modica	Wurdack	Blakea modica	(Wurdack) Penneys & Judd	Topobea modica Wurdack	Blakea modica (Wurdack) Penneys & Judd
Topobea mortoniana	Wurdack	Blakea mortoniana	(Wurdack) Penneys & Judd	Topobea mortoniana Wurdack	Blakea mortoniana (Wurdack) Penneys & Judd
Topobea multiflora	(D.Don) Triana	Blakea multiflora	D.Don	Topobea multiflora (D.Don) Triana	Blakea multiflora D.Don
Topobea muricata	Lozano	Blakea muricata	(Lozano) Penneys & Judd	Topobea muricata Lozano	Blakea muricata (Lozano) Penneys & Judd
Topobea parasitica	Aubl.	Blakea parasitica	(Aublet) D.Don	Topobea parasitica Aubl.	Blakea parasitica (Aublet) D.Don
Topobea parvifolia	(Gleason) Almeda	Blakea parvifolia	Gleason	Topobea parvifolia (Gleason) Almeda	Blakea parvifolia Gleason
Topobea pascoensis	Wurdack	Blakea pascoensis	(Wurdack) Penneys & Judd	Topobea pascoensis Wurdack	Blakea pascoensis (Wurdack) Penneys & Judd
Topobea pittieri	Cogn.	Blakea henripittieri	Penneys & Almeda	Topobea pittieri Cogn.	Blakea henripittieri Penneys & Almeda
Topobea pluvialis	Standl.	Blakea pluvialis	(Standl.) Penneys & Almeda	Topobea pluvialis Standl.	Blakea pluvialis (Standl.) Penneys & Almeda
Topobea punctulata	Triana	Blakea punctulata	(Triana) Wurdack	Topobea punctulata Triana	Blakea punctulata (Triana) Wurdack
Topobea rotundifolia	(D.Don) Naudin	Blakea rotundifolia	D.Don	Topobea rotundifolia (D.Don) Naudin	Blakea rotundifolia D.Don
Topobea sessilifolia	Triana	Blakea sessilifolia	(Triana) Penneys & Judd	Topobea sessilifolia Triana	Blakea sessilifolia (Triana) Penneys & Judd
Topobea setosa	Triana	Blakea setosa	(Triana) Penneys & Judd	Topobea setosa Triana	Blakea setosa (Triana) Penneys & Judd
Topobea standleyi	L.O.Williams	Blakea standleyi	(L.O.Williams) Penneys & Almeda	Topobea standleyi L.O.Williams	Blakea standleyi (L.O.Williams) Penneys & Almeda
Topobea stephanochaeta	Naudin	Blakea stephanochaeta	(Naudin) Penneys & Judd	Topobea stephanochaeta Naudin	Blakea stephanochaeta (Naudin) Penneys & Judd
Topobea steyermarkii	Wurdack	Blakea steyermarkii	(Wurdack) Penneys & Judd	Topobea steyermarkii Wurdack	Blakea steyermarkii (Wurdack) Penneys & Judd
Topobea storkiii	Standl.	Blakea storkii	(Standl.) Almeda	Topobea storkiii Standl.	Blakea storkii (Standl.) Almeda
Topobea suaveolens	Almeda	Blakea suaveolens	(Almeda) Penneys & Almeda	Topobea suaveolens Almeda	Blakea suaveolens (Almeda) Penneys & Almeda
Topobea subbarbata	Wurdack	Blakea subbarbata	(Wurdack) Penneys & Judd	Topobea subbarbata Wurdack	Blakea subbarbata (Wurdack) Penneys & Judd
Topobea subscabrula	Triana	Blakea subscabrula	(Triana) Penneys & Judd	Topobea subscabrula Triana	Blakea subscabrula (Triana) Penneys & Judd
Topobea subsessiliflora	Wurdack	Blakea subsessiliflora	(Wurdack) Penneys & Judd	Topobea subsessiliflora Wurdack	Blakea subsessiliflora (Wurdack) Penneys & Judd
Topobea superba	Naudin	Blakea superba	(Naudin) Penneys & Judd	Topobea superba Naudin	Blakea superba (Naudin) Penneys & Judd
Topobea tetramera	Almeda	Blakea tetramera	(Almeda) Penneys & Almeda	Topobea tetramera Almeda	Blakea tetramera (Almeda) Penneys & Almeda
Topobea tetroici	Wurdack	Blakea tetroici	(Wurdack) Penneys & Judd	Topobea tetroici Wurdack	Blakea tetroici (Wurdack) Penneys & Judd
Topobea toachiensis	Wurdack	Blakea toachiensis	(Wurdack) Penneys & Judd	Topobea toachiensis Wurdack	Blakea toachiensis (Wurdack) Penneys & Judd
Topobea trianaei	Cogn.	Blakea trianae	(Cogn.) Penneys & Judd	Topobea trianaei Cogn.	Blakea trianae (Cogn.) Penneys & Judd
Topobea verrucosa	Wurdack	Blakea verrucosa	(Wurdack) Penneys & Judd	Topobea verrucosa Wurdack	Blakea verrucosa (Wurdack) Penneys & Judd
Topobea watsonii	Cogn.	Blakea watsonii	(Cogn.) Penneys & Almeda	Topobea watsonii Cogn.	Blakea watsonii (Cogn.) Penneys & Almeda

## Sheet: Neotropical Species 5
Currently accepted name	Authors
Acanthella pulchra	Gleason		Acanthella pulchra Gleason
Acanthella sprucei	Benth. & Hook. f.		Acanthella sprucei Benth. & Hook. f.
Aciotis acuminifolia	(Mart. ex DC.) Triana		Aciotis acuminifolia (Mart. ex DC.) Triana
Aciotis annua	(Mart. ex DC.) Triana		Aciotis annua (Mart. ex DC.) Triana
Aciotis circaeifolia	(Bonpl.) Triana		Aciotis circaeifolia (Bonpl.) Triana
Aciotis ferreirana	Brade		Aciotis ferreirana Brade
Aciotis indecora	(Bonpl.) Triana		Aciotis indecora (Bonpl.) Triana
Aciotis olivieriana	Freire-Fierro		Aciotis olivieriana Freire-Fierro
Aciotis ornata	(Miq.) Gleason		Aciotis ornata (Miq.) Gleason
Aciotis paludosa	(Mart. ex DC.) Triana		Aciotis paludosa (Mart. ex DC.) Triana
Aciotis polystachya	(Bonpl.) Triana		Aciotis polystachya (Bonpl.) Triana
Aciotis purpurascens	(Aubl.) Triana		Aciotis purpurascens (Aubl.) Triana
Aciotis rubricaulis	(Mart. ex DC.) Triana		Aciotis rubricaulis (Mart. ex DC.) Triana
Aciotis viscida	(Benth.) Freire-Fierro		Aciotis viscida (Benth.) Freire-Fierro
Aciotis wurdackiana	Freire-Fierro		Aciotis wurdackiana Freire-Fierro
Acisanthera alsinaefolia	(DC.) Triana		Acisanthera alsinaefolia (DC.) Triana
Acisanthera ayangannae	(Wurdack) M.J.R.Rocha & P.J.F.Guim.		Acisanthera ayangannae (Wurdack) M.J.R.Rocha & P.J.F.Guim.,
Acisanthera boliviensis	Cogn. ex Kuntze		Acisanthera boliviensis Cogn. ex Kuntze
Acisanthera erecta	J.St.-Hil.		Acisanthera erecta J.St.-Hil.
Acisanthera fluitans	Cogn.		Acisanthera fluitans Cogn.
Acisanthera paraguayensis	(Hook.f.) Cogn.		Acisanthera paraguayensis (Hook.f.) Cogn.
Acisanthera uniflora	(Vahl) Gleason		Acisanthera uniflora (Vahl) Gleason
Acisanthera variabilis	(DC.) Triana		Acisanthera variabilis (DC.) Triana
Adelobotrys acreana	Wurdack		Adelobotrys acreana Wurdack
Adelobotrys adscendens	(Sw.) Triana		Adelobotrys adscendens (Sw.) Triana
Adelobotrys atlantica	Schulman		Adelobotrys atlantica Schulman
Adelobotrys ayangannensis	Wurdack		Adelobotrys ayangannensis Wurdack
Adelobotrys barbata	Triana		Adelobotrys barbata Triana
Adelobotrys boissierianus	Cogn.		Adelobotrys boissierianus Cogn.
Adelobotrys ciliatus	(Naudin) Triana		Adelobotrys ciliatus (Naudin) Triana
Adelobotrys duidae	(Gleason) Wurdack		Adelobotrys duidae (Gleason) Wurdack
Adelobotrys fruticosa	Wurdack		Adelobotrys fruticosa Wurdack
Adelobotrys fuscescens	Triana		Adelobotrys fuscescens Triana
Adelobotrys intonsus	(Gleason) Wurdack		Adelobotrys intonsus (Gleason) Wurdack
Adelobotrys jefensis	Almeda		Adelobotrys jefensis Almeda
Adelobotrys klugii	Wurdack		Adelobotrys klugii Wurdack
Adelobotrys latifolius	Schulman		Adelobotrys latifolius Schulman
Adelobotrys linearifolius	L. Uribe		Adelobotrys linearifolius L. Uribe
Adelobotrys macrantha	Gleason		Adelobotrys macrantha Gleason
Adelobotrys macrophyllus	Pilg.		Adelobotrys macrophyllus Pilg.
Adelobotrys marginatus	Brade		Adelobotrys marginatus Brade
Adelobotrys microcarpus	Schulman		Adelobotrys microcarpus Schulman
Adelobotrys monticola	Gleason		Adelobotrys monticola Gleason
Adelobotrys permixta	Wurdack		Adelobotrys permixta Wurdack
Adelobotrys praetextus	Pilg.		Adelobotrys praetextus Pilg.
Adelobotrys rachidotrichia	Brade		Adelobotrys rachidotrichia Brade
Adelobotrys rotundifolius	Triana		Adelobotrys rotundifolius Triana
Adelobotrys ruokolainenii	Schulman		Adelobotrys ruokolainenii Schulman
Adelobotrys saxosa	Wurdack		Adelobotrys saxosa Wurdack
Adelobotrys scandens	(Aubl.) DC.		Adelobotrys scandens (Aubl.) DC.
Adelobotrys spruceanus	Cogn.		Adelobotrys spruceanus Cogn.
Adelobotrys stenophylla	Wurdack		Adelobotrys stenophylla Wurdack
Adelobotrys subsessilis	Gleason		Adelobotrys subsessilis Gleason
Adelobotrys tessmannii	Markgr.		Adelobotrys tessmannii Markgr.
Allomaieta caucana	Lozano		Allomaieta caucana Lozano
Allomaieta ebejicosana	Lozano		Allomaieta ebejicosana Lozano
Allomaieta grandiflora	Gleason		Allomaieta grandiflora Gleason
Allomaieta hirsuta	(Gleason) Lozano		Allomaieta hirsuta (Gleason) Lozano
Allomaieta javierbarrigae	H. Mend.		Allomaieta javierbarrigae H. Mend.
Allomaieta pancurana	Lozano		Allomaieta pancurana Lozano
Allomaieta strigosa	(Gleason) Lozano		Allomaieta strigosa (Gleason) Lozano
Allomaieta villosa	(Gleason) Lozano		Allomaieta villosa (Gleason) Lozano
Allomaieta zenufanasana	Lozano		Allomaieta zenufanasana Lozano
Alloneuron glomeratum	C. Ulloa & Michelang.		Alloneuron glomeratum C. Ulloa & Michelang.
Alloneuron liron	B. Walln.		Alloneuron liron B. Walln.
Alloneuron majus	(Markgr.) Markgr. ex J.F. Macbr.		Alloneuron majus (Markgr.) Markgr. ex J.F. Macbr.
Alloneuron ronliesneri	B. Walln.		Alloneuron ronliesneri B. Walln.
Alloneuron ulei	Pilg.		Alloneuron ulei Pilg.
Andesanthus aristeguietae	(Wurdack) P.J.F.Guim. & Michelang.		Andesanthus aristeguietae (Wurdack) P.J.F.Guim. & Michelang.
Andesanthus elegantulus	(Todzia & Almeda) P.J.F.Guim.& Michelang.		Andesanthus elegantulus (Todzia & Almeda) P.J.F.Guim.& Michelang.
Andesanthus gleasonianus	(Wurdack) P.J.F.Guim. & Michelang.		Andesanthus gleasonianus (Wurdack) P.J.F.Guim. & Michelang.
Andesanthus inopinatus	(Wurdack) P.J.F.Guim. & Michelang.		Andesanthus inopinatus (Wurdack) P.J.F.Guim. & Michelang.
Andesanthus lepidotus	(Bonpl.) P.J.F.Guim. & Michelang.		Andesanthus lepidotus (Bonpl.) P.J.F.Guim. & Michelang.
Andesanthus narinoensis	(Wurdack) P.J.F.Guim. & Michelang.		Andesanthus narinoensis (Wurdack) P.J.F.Guim. & Michelang.
Andesanthus paleaceus	(Triana ex Mart.) P.J.F.Guim. & Michelang.		Andesanthus paleaceus (Triana ex Mart.) P.J.F.Guim. & Michelang.
Andesanthus silvestris	(Todzia & Almeda) P.J.F.Guim.& Michelang.		Andesanthus silvestris (Todzia & Almeda) P.J.F.Guim.& Michelang.
Andesanthus wurdackii	(Almeda & Todzia) P.J.F.Guim. & Michelang.		Andesanthus wurdackii (Almeda & Todzia) P.J.F.Guim. & Michelang.
Appendicularia pullei	(Gleason) M.J.R.Rocha & P.J.F.Guim		Appendicularia pullei (Gleason) M.J.R.Rocha & P.J.F.Guim
Appendicularia subglabra	(Wurdack) M.J.R.Rocha & P.J.F.Guim.		Appendicularia subglabra (Wurdack) M.J.R.Rocha & P.J.F.Guim.
Appendicularia thymifolia	(Bonpl.) DC.		Appendicularia thymifolia (Bonpl.) DC.
Arthrostemma alatum	Triana		Arthrostemma alatum Triana
Arthrostemma ciliatum	Pav. ex D. Don		Arthrostemma ciliatum Pav. ex D. Don
Arthrostemma parvifolium	Cogn.		Arthrostemma parvifolium Cogn.
Arthrostemma primaevum	Almeda		Arthrostemma primaevum Almeda
Axinaea affinis	(Naudin) Cogn.		Axinaea affinis (Naudin) Cogn.
Axinaea alata	E. Cotton		Axinaea alata E. Cotton
Axinaea campii	E. Cotton		Axinaea campii E. Cotton
Axinaea carolina-telleziae	Bussmann & Paniagua		Axinaea carolina-telleziae Bussmann & Paniagua
Axinaea colombiana	Lozano & Alvear		Axinaea colombiana Lozano & Alvear
Axinaea confusa	E. Cotton		Axinaea confusa E. Cotton
Axinaea costaricensis	Cogn.		Axinaea costaricensis Cogn.
Axinaea crassinoda	Triana		Axinaea crassinoda Triana
Axinaea dentata	E. Cotton		Axinaea dentata E. Cotton
Axinaea dependens	Ruiz & Pav. ex D. Don		Axinaea dependens Ruiz & Pav. ex D. Don
Axinaea disrupta	E. Cotton		Axinaea disrupta E. Cotton
Axinaea fallax	Gleason		Axinaea fallax Gleason
Axinaea fernando-cabiesii	Bussmann, J.A. Gruhn & A. Glenn		Axinaea fernando-cabiesii Bussmann, J.A. Gruhn & A. Glenn
Axinaea flava	E. Cotton, Bussmann & P. Lozano		Axinaea flava E. Cotton, Bussmann & P. Lozano
Axinaea floribunda	(Naudin) Triana		Axinaea floribunda (Naudin) Triana
Axinaea glandulosa	Ruiz & Pav. ex D. Don		Axinaea glandulosa Ruiz & Pav. ex D. Don
Axinaea glauca	E. Cotton & P. Lozano		Axinaea glauca E. Cotton & P. Lozano
Axinaea grandifolia	(Naudin) Triana		Axinaea grandifolia (Naudin) Triana
Axinaea lanceolata	Ruiz & Pav.		Axinaea lanceolata Ruiz & Pav.
Axinaea lawessonii	E. Cotton		Axinaea lawessonii E. Cotton
Axinaea lehmannii	Cogn.		Axinaea lehmannii Cogn.
Axinaea luteynii	E. Cotton		Axinaea luteynii E. Cotton
Axinaea macrophylla	(Naudin) Triana		Axinaea macrophylla (Naudin) Triana
Axinaea merianiae	(DC.) Triana		Axinaea merianiae (DC.) Triana
Axinaea mertensioides	Wurdack		Axinaea mertensioides Wurdack
Axinaea minutiflora	E. Cotton		Axinaea minutiflora E. Cotton
Axinaea nitida	Cogn.		Axinaea nitida Cogn.
Axinaea oblongifolia	(Cogn.) Wurdack		Axinaea oblongifolia (Cogn.) Wurdack
Axinaea pauciflora	Cogn.		Axinaea pauciflora Cogn.
Axinaea pendula	E. Cotton		Axinaea pendula E. Cotton
Axinaea pennellii	Gleason		Axinaea pennellii Gleason
Axinaea quitensis	Benoist		Axinaea quitensis Benoist
Axinaea reginae	Bussmann, J.A. Gruhn & A. Glenn		Axinaea reginae Bussmann, J.A. Gruhn & A. Glenn
Axinaea ruizteranii	Wurdack		Axinaea ruizteranii Wurdack
Axinaea sclerophylla	Triana		Axinaea sclerophylla Triana
Axinaea scutigera	Triana		Axinaea scutigera Triana
Axinaea sessilifolia	Triana		Axinaea sessilifolia Triana
Axinaea sodiroi	Wurdack		Axinaea sodiroi Wurdack
Axinaea tomentosa	Cogn.		Axinaea tomentosa Cogn.
Axinaea weberbaueri	Cogn.		Axinaea weberbaueri Cogn.
Axinaea wurdackii	Sagást., S.J. Arroyo & E. Rodr.		Axinaea wurdackii Sagást., S.J. Arroyo & E. Rodr.
Bellucia acutata	Pilg.		Bellucia acutata Pilg.
Bellucia aequiloba	Pilg.		Bellucia aequiloba Pilg.
Bellucia arborescens	(Aubl.) Baill.		Bellucia arborescens (Aubl.) Baill.
Bellucia beckii	S.S. Renner		Bellucia beckii S.S. Renner
Bellucia dichotoma	Cogn.		Bellucia dichotoma Cogn.
Bellucia egensis	(Mart. ex DC.) Penneys, Michelang., Judd & Almeda		Bellucia egensis (Mart. ex DC.) Penneys, Michelang., Judd & Almeda
Bellucia gracilis	(S.S. Renner) Penneys, Michelang., Judd & Almeda		Bellucia gracilis (S.S. Renner) Penneys, Michelang., Judd & Almeda
Bellucia grossularioides	(L.) Triana		Bellucia grossularioides (L.) Triana
Bellucia huberi	(Wurdack) S.S. Renner		Bellucia huberi (Wurdack) S.S. Renner
Bellucia klugii	(S.S. Renner) Penneys, Michelang., Judd & Almeda		Bellucia klugii (S.S. Renner) Penneys, Michelang., Judd & Almeda
Bellucia mespiloides	(Miq.) J.F. Macbr.		Bellucia mespiloides (Miq.) J.F. Macbr.
Bellucia nigricans	(Hook. f.) Penneys, Michelang., Judd & Almeda		Bellucia nigricans (Hook. f.) Penneys, Michelang., Judd & Almeda
Bellucia ovata	(O. Berg ex Triana) Penneys, Michelang., Judd & Almeda		Bellucia ovata (O. Berg ex Triana) Penneys, Michelang., Judd & Almeda
Bellucia pentamera	Naudin		Bellucia pentamera Naudin
Bellucia riparia	(S.S. Renner) Penneys, Michelang., Judd & Almeda		Bellucia riparia (S.S. Renner) Penneys, Michelang., Judd & Almeda
Bellucia spruceana	(Benth. ex Triana) J.F. Macbr.		Bellucia spruceana (Benth. ex Triana) J.F. Macbr.
Bellucia strigosa	(Gleason) Penneys, Michelang., Judd & Almeda		Bellucia strigosa (Gleason) Penneys, Michelang., Judd & Almeda
Bellucia subandina	(Wurdack) Penneys, Michelang., Judd & Almeda		Bellucia subandina (Wurdack) Penneys, Michelang., Judd & Almeda
Bellucia subrotundifolia	Wurdack		Bellucia subrotundifolia Wurdack
Bellucia umbellata	Gleason		Bellucia umbellata Gleason
Bellucia villosa	Lozano & L.M. Quiñones		Bellucia villosa Lozano & L.M. Quiñones
Bellucia wurdackiana	(S.S. Renner) Penneys, Michelang., Judd & Almeda		Bellucia wurdackiana (S.S. Renner) Penneys, Michelang., Judd & Almeda
Bertolonia acuminata	Gardner		Bertolonia acuminata Gardner
Bertolonia alternifolia	Baumgratz, Amorim & A. Jardim		Bertolonia alternifolia Baumgratz, Amorim & A. Jardim
Bertolonia angustifolia	Cogn.		Bertolonia angustifolia Cogn.
Bertolonia bullata	Baumgratz, Amorim & A. B. Jardim		Bertolonia bullata Baumgratz, Amorim & A. B. Jardim
Bertolonia carmoi	Baumgratz		Bertolonia carmoi Baumgratz
Bertolonia cuspidata	Bacci & Amorim		Bertolonia cuspidata Bacci & Amorim
Bertolonia duasbocaensis	Bacci & R. Goldenb.		Bertolonia duasbocaensis Bacci & R. Goldenb.
Bertolonia formosa	Brade		Bertolonia formosa Brade
Bertolonia foveolata	Brade		Bertolonia foveolata Brade
Bertolonia grazielae	Baumgratz		Bertolonia grazielae Baumgratz
Bertolonia hirsutissima	Bacci, Michelang. & R. Goldenb.		Bertolonia hirsutissima Bacci, Michelang. & R. Goldenb.
Bertolonia hoehneana	Baumgratz		Bertolonia hoehneana Baumgratz
Bertolonia igrapiuna	Bisewski, Bacci & R. Goldenb.		Bertolonia igrapiuna Bisewski, Bacci & R. Goldenb.
Bertolonia kollmannii	Bacci & R. Goldenb.		Bertolonia kollmannii Bacci & R. Goldenb.
Bertolonia leuzeana	(Bonpl.) DC.		Bertolonia leuzeana (Bonpl.) DC.
Bertolonia linearifolia	Bacci & Michelang.		Bertolonia linearifolia Bacci & Michelang.
Bertolonia lucernula	Bacci, D.T. Iglesias & R. Goldenb.		Bertolonia lucernula Bacci, D.T. Iglesias & R. Goldenb.
Bertolonia macrocalyx	Bacci & R. Goldenb.		Bertolonia macrocalyx Bacci & R. Goldenb.
Bertolonia maculata	DC.		Bertolonia maculata DC.
Bertolonia margaritacea	Naudin		Bertolonia margaritacea Naudin
Bertolonia marmorata	(Naudin) Naudin		Bertolonia marmorata (Naudin) Naudin
Bertolonia michelangeliana	Bacci & R. Goldenb.		Bertolonia michelangeliana Bacci & R. Goldenb.
Bertolonia mosenii	Cogn.		Bertolonia mosenii Cogn.
Bertolonia nymphaeifolia	Raddi		Bertolonia nymphaeifolia Raddi
Bertolonia organensis	Baumgratz, Silva-Gonçalves & Nunes-Freitas		Bertolonia organensis Baumgratz, Silva-Gonçalves & Nunes-Freitas
Bertolonia paranaensis	Baumgratz		Bertolonia paranaensis Baumgratz
Bertolonia reginatoi	Bacci & Michelang.		Bertolonia reginatoi Bacci & Michelang.
Bertolonia riocontensis	Bisewski, Bacci & R. Goldenb.,		Bertolonia riocontensis Bisewski, Bacci & R. Goldenb.,
Bertolonia ruschiana	Bacci & R. Goldenb.		Bertolonia ruschiana Bacci & R. Goldenb.
Bertolonia sanguinea	Saldanha ex Cogn.		Bertolonia sanguinea Saldanha ex Cogn.
Bertolonia valenteana	Baumgratz		Bertolonia valenteana Baumgratz
Bertolonia venezuelensis	Wurdack		Bertolonia venezuelensis Wurdack
Bertolonia violacea	Bisewski, Bacci & R. Goldenb.,		Bertolonia violacea Bisewski, Bacci & R. Goldenb.,
Bertolonia vitoriana	Bacci & Amorim		Bertolonia vitoriana Bacci & Amorim
Bertolonia wurdackiana	Baumgratz		Bertolonia wurdackiana Baumgratz
Bisglaziovia behurioides	Cogn.		Bisglaziovia behurioides Cogn.
Blakea acostae	Wurdack		Blakea acostae Wurdack
Blakea acuminata	(Wurdack) Penneys & Judd		Blakea acuminata (Wurdack) Penneys & Judd
Blakea adscendens	(E. Cotton & Matezki) Penneys & Judd		Blakea adscendens (E. Cotton & Matezki) Penneys & Judd
Blakea aeruginosa	Standl.		Blakea aeruginosa Standl.
Blakea albertiae	(Wurdack) Penneys & Almeda		Blakea albertiae (Wurdack) Penneys & Almeda
Blakea allotricha	L. Uribe		Blakea allotricha L. Uribe
Blakea alternifolia	(Gleason) Gleason		Blakea alternifolia (Gleason) Gleason
Blakea amabilis	(Linden) Cogn.		Blakea amabilis (Linden) Cogn.
Blakea amplifolia	(Almeda) Penneys & Almeda		Blakea amplifolia (Almeda) Penneys & Almeda
Blakea andreana	Cogn.		Blakea andreana Cogn.
Blakea anisophylla	(Triana) Baill.		Blakea anisophylla (Triana) Baill.
Blakea anomala	Donn. Sm.		Blakea anomala Donn. Sm.
Blakea arboricola	(Almeda) Penneys & Almeda		Blakea arboricola (Almeda) Penneys & Almeda
Blakea argentea	Gleason		Blakea argentea Gleason
Blakea asplundii	(Wurdack) Penneys & Judd		Blakea asplundii (Wurdack) Penneys & Judd
Blakea attenboroughii	Penneys & L. Jost		Blakea attenboroughii Penneys & L. Jost
Blakea austin-smithii	Standl.		Blakea austin-smithii Standl.
Blakea barbata	(Gleason) Penneys & Judd		Blakea barbata (Gleason) Penneys & Judd
Blakea bocatorena	Kriebel & D. Santam.		Blakea bocatorena Kriebel & D. Santam.
Blakea brachyura	Gleason		Blakea brachyura Gleason
Blakea bracteata	Gleason		Blakea bracteata Gleason
Blakea brasiliensis	Cogn.		Blakea brasiliensis Cogn.
Blakea brenesii	(Standl.) Penneys & Almeda		Blakea brenesii (Standl.) Penneys & Almeda
Blakea brevibracteata	(Gleason) Penneys & Judd		Blakea brevibracteata (Gleason) Penneys & Judd
Blakea brunnea	Gleason		Blakea brunnea Gleason
Blakea bullata	(E. Cotton & Matezki) Penneys & Judd		Blakea bullata (E. Cotton & Matezki) Penneys & Judd
Blakea calcarata	(L. Uribe) Penneys & Judd		Blakea calcarata (L. Uribe) Penneys & Judd
Blakea calophylla	(Almeda) Penneys & Almeda		Blakea calophylla (Almeda) Penneys & Almeda
Blakea calycosa	Gleason		Blakea calycosa Gleason
Blakea calycularis	(Naudin) Penneys & Almeda		Blakea calycularis (Naudin) Penneys & Almeda
Blakea calyptrata	Gleason		Blakea calyptrata Gleason
Blakea campii	Wurdack		Blakea campii Wurdack
Blakea castanedae	(Wurdack) Penneys & Judd		Blakea castanedae (Wurdack) Penneys & Judd
Blakea chlorantha	Almeda		Blakea chlorantha Almeda
Blakea ciliata	Markgr.		Blakea ciliata Markgr.
Blakea clavata	Penneys & Judd		Blakea clavata Penneys & Judd
Blakea clusiifolia	Gleason		Blakea clusiifolia Gleason
Blakea coloradensis	Almeda		Blakea coloradensis Almeda
Blakea cordata	(Gleason) Penneys & Almeda		Blakea cordata (Gleason) Penneys & Almeda
Blakea costaricensis	Umaña & Almeda		Blakea costaricensis Umaña & Almeda
Blakea crassifolia	Almeda		Blakea crassifolia Almeda
Blakea crinita	Gleason		Blakea crinita Gleason
Blakea cuatrecasasii	Gleason		Blakea cuatrecasasii Gleason
Blakea cuneata	Standl.		Blakea cuneata Standl.
Blakea cuprina	Penneys & Judd		Blakea cuprina Penneys & Judd
Blakea cutucuensis	(Wurdack) Penneys & Judd		Blakea cutucuensis (Wurdack) Penneys & Judd
Blakea darcyana	Almeda		Blakea darcyana Almeda
Blakea dimorphophylla	(Almeda) Penneys & Almeda		Blakea dimorphophylla (Almeda) Penneys & Almeda
Blakea discolor	(Hochr.) Penneys & Judd		Blakea discolor (Hochr.) Penneys & Judd
Blakea dodsoniorum	(Wurdack) Penneys & Almeda		Blakea dodsoniorum (Wurdack) Penneys & Almeda
Blakea droseripila	Penneys		Blakea droseripila Penneys
Blakea echinata	Almeda & Penneys		Blakea echinata Almeda & Penneys
Blakea elliptica	(Gleason) Almeda		Blakea elliptica (Gleason) Almeda
Blakea eplingii	(Wurdack) Penneys & Judd		Blakea eplingii (Wurdack) Penneys & Judd
Blakea eriocalyx	Wurdack		Blakea eriocalyx Wurdack
Blakea fasciculata	Gleason		Blakea fasciculata Gleason
Blakea ferruginea	(Gleason) Penneys & Judd		Blakea ferruginea (Gleason) Penneys & Judd
Blakea fissicalyx	L. Uribe		Blakea fissicalyx L. Uribe
Blakea florifera	Gleason		Blakea florifera Gleason
Blakea foliacea	Gleason		Blakea foliacea Gleason
Blakea formicaria	Wurdack		Blakea formicaria Wurdack
Blakea fragrantissima	(Almeda) Penneys & Almeda		Blakea fragrantissima (Almeda) Penneys & Almeda
Blakea fuchsioides	Almeda		Blakea fuchsioides Almeda
Blakea gerardoana	(Almeda) Penneys & Almeda		Blakea gerardoana (Almeda) Penneys & Almeda
Blakea glaberrima	(Triana) Penneys & Judd		Blakea glaberrima (Triana) Penneys & Judd
Blakea glabrescens	Benth.		Blakea glabrescens Benth.
Blakea glandulosa	Gleason		Blakea glandulosa Gleason
Blakea gracilis	Hemsl.		Blakea gracilis Hemsl.
Blakea granatensis	Naudin		Blakea granatensis Naudin
Blakea grandiflora	Hemsl.		Blakea grandiflora Hemsl.
Blakea gregii	Almeda		Blakea gregii Almeda
Blakea grisebachii	Cogn.		Blakea grisebachii Cogn.
Blakea guatemalensis	Donn. Sm.		Blakea guatemalensis Donn. Sm.
Blakea hammelii	Almeda		Blakea hammelii Almeda
Blakea hammettiorum	Almeda		Blakea hammettiorum Almeda
Blakea harlingii	Wurdack		Blakea harlingii Wurdack
Blakea henripittieri	Penneys & Almeda		Blakea henripittieri Penneys & Almeda
Blakea herrerae	Almeda		Blakea herrerae Almeda
Blakea hexandra	(Almeda) Penneys & Almeda		Blakea hexandra (Almeda) Penneys & Almeda
Blakea hirsuta	Berg ex Triana		Blakea hirsuta Berg ex Triana
Blakea hirsutissima	(J.F. Macbr.) Wurdack		Blakea hirsutissima (J.F. Macbr.) Wurdack
Blakea hispida	Markgr.		Blakea hispida Markgr.
Blakea holtonii	Hochr.		Blakea holtonii Hochr.
Blakea horologica	Penneys & Judd		Blakea horologica Penneys & Judd
Blakea hydraeformis	Wurdack		Blakea hydraeformis Wurdack
Blakea incompta	Markgr.		Blakea incompta Markgr.
Blakea induta	(Markgr.) Penneys & Judd		Blakea induta (Markgr.) Penneys & Judd
Blakea inflata	(Triana) Penneys & Judd		Blakea inflata (Triana) Penneys & Judd
Blakea insignis	(Triana) Penneys & Judd		Blakea insignis (Triana) Penneys & Judd
Blakea intricata	(Almeda) Penneys & Almeda		Blakea intricata (Almeda) Penneys & Almeda
Blakea involvens	Markgr.		Blakea involvens Markgr.
Blakea jativae	Wurdack		Blakea jativae Wurdack
Blakea killipii	(Wurdack) Penneys & Judd		Blakea killipii (Wurdack) Penneys & Judd
Blakea laevigata	D. Don		Blakea laevigata D. Don
Blakea lanuginosa	Wurdack		Blakea lanuginosa Wurdack
Blakea latifolia	(Ruiz & Pav.) D. Don		Blakea latifolia (Ruiz & Pav.) D. Don
Blakea lentii	(Almeda) Penneys & Almeda		Blakea lentii (Almeda) Penneys & Almeda
Blakea lindeniana	(Naudin) Triana		Blakea lindeniana (Naudin) Triana
Blakea litoralis	L.O. Williams		Blakea litoralis L.O. Williams
Blakea longibracteata	Cogn.		Blakea longibracteata Cogn.
Blakea longiloba	(Wurdack) Penneys & Judd		Blakea longiloba (Wurdack) Penneys & Judd
Blakea longipes	L. Uribe		Blakea longipes L. Uribe
Blakea longisepala	(Gleason) Penneys & Judd		Blakea longisepala (Gleason) Penneys & Judd
Blakea macbrydei	(Wurdack) Penneys & Judd		Blakea macbrydei (Wurdack) Penneys & Judd
Blakea madisonii	Wurdack		Blakea madisonii Wurdack
Blakea maguirei	(Wurdack) Penneys & Judd		Blakea maguirei (Wurdack) Penneys & Judd
Blakea maurofernandeziana	(Cogn.) Penneys & Almeda		Blakea maurofernandeziana (Cogn.) Penneys & Almeda
Blakea mcphersonii	(Almeda) Penneys & Almeda		Blakea mcphersonii (Almeda) Penneys & Almeda
Blakea megaphylla	Wurdack		Blakea megaphylla Wurdack
Blakea mexiae	Gleason		Blakea mexiae Gleason
Blakea micrantha	Almeda		Blakea micrantha Almeda
Blakea modica	(Wurdack) Penneys & Judd		Blakea modica (Wurdack) Penneys & Judd
Blakea monticola	J.R. Johnst.		Blakea monticola J.R. Johnst.
Blakea mortoniana	(Wurdack) Penneys & Judd		Blakea mortoniana (Wurdack) Penneys & Judd
Blakea multiflora	D. Don		Blakea multiflora D. Don
Blakea muricata	(Lozano) Penneys & Judd		Blakea muricata (Lozano) Penneys & Judd
Blakea nangaritzana	D. Fernández, C. Ulloa & Penneys		Blakea nangaritzana D. Fernández, C. Ulloa & Penneys
Blakea nareliana	Bussmann		Blakea nareliana Bussmann
Blakea nodosa	Wurdack		Blakea nodosa Wurdack
Blakea oldemanii	Wurdack		Blakea oldemanii Wurdack
Blakea orientalis	Gleason		Blakea orientalis Gleason
Blakea ovalis	(Ruiz & Pav.) D. Don		Blakea ovalis (Ruiz & Pav.) D. Don
Blakea paleacea	Gleason		Blakea paleacea Gleason
Blakea paludosa	Gleason		Blakea paludosa Gleason
Blakea parasitica	(Aubl.) D. Don		Blakea parasitica (Aubl.) D. Don
Blakea parvifolia	Gleason		Blakea parvifolia Gleason
Blakea pascoensis	(Wurdack) Penneys & Judd		Blakea pascoensis (Wurdack) Penneys & Judd
Blakea pauciflora	Gleason		Blakea pauciflora Gleason
Blakea pectinata	Penneys		Blakea pectinata Penneys
Blakea penduliflora	Almeda		Blakea penduliflora Almeda
Blakea perforata	Almeda		Blakea perforata Almeda
Blakea pichinchensis	Wurdack		Blakea pichinchensis Wurdack
Blakea pilosa	Gleason		Blakea pilosa Gleason
Blakea platypoda	Gleason		Blakea platypoda Gleason
Blakea pluvialis	(Standl.) Penneys & Almeda		Blakea pluvialis (Standl.) Penneys & Almeda
Blakea podagrica	Triana		Blakea podagrica Triana
Blakea polyantha	Wurdack		Blakea polyantha Wurdack
Blakea portentosa	Wurdack		Blakea portentosa Wurdack
Blakea princeps	(Linden ex Mast.) Cogn.		Blakea princeps (Linden ex Mast.) Cogn.
Blakea pulverulenta	Vahl		Blakea pulverulenta Vahl
Blakea punctulata	(Triana) Wurdack		Blakea punctulata (Triana) Wurdack
Blakea purpusii	Brandegee		Blakea purpusii Brandegee
Blakea pyxidanthus	Triana		Blakea pyxidanthus Triana
Blakea quadrangularis	Triana		Blakea quadrangularis Triana
Blakea quadriflora	Gleason		Blakea quadriflora Gleason
Blakea repens	(Ruiz & Pav.) D. Don		Blakea repens (Ruiz & Pav.) D. Don
Blakea ricardoi	Michelang. & D.Santam.		Blakea ricardoi Michelang. & D.Santam.
Blakea rosea	(Ruiz & Pav.) D. Don		Blakea rosea (Ruiz & Pav.) D. Don
Blakea rostrata	Berg ex Triana		Blakea rostrata Berg ex Triana
Blakea rotundifolia	D. Don		Blakea rotundifolia D. Don
Blakea sawadae	J.F. Macbr.		Blakea sawadae J.F. Macbr.
Blakea scarlatina	Almeda		Blakea scarlatina Almeda
Blakea schlimii	(Naudin) Triana		Blakea schlimii (Naudin) Triana
Blakea schultzei	Markgr.		Blakea schultzei Markgr.
Blakea sessilifolia	(Triana) Penneys & Judd		Blakea sessilifolia (Triana) Penneys & Judd
Blakea setosa	(Triana) Penneys & Judd		Blakea setosa (Triana) Penneys & Judd
Blakea spruceana	Cogn.		Blakea spruceana Cogn.
Blakea squamigera	L. Uribe		Blakea squamigera L. Uribe
Blakea standleyana	J.F. Macbr.		Blakea standleyana J.F. Macbr.
Blakea standleyi	(L.O. Williams) Penneys & Almeda		Blakea standleyi (L.O. Williams) Penneys & Almeda
Blakea stellaris	Gleason		Blakea stellaris Gleason
Blakea stephanochaeta	(Naudin) Penneys & Judd		Blakea stephanochaeta (Naudin) Penneys & Judd
Blakea steyermarkii	(Wurdack) Penneys & Judd		Blakea steyermarkii (Wurdack) Penneys & Judd
Blakea stipulacea	Wurdack		Blakea stipulacea Wurdack
Blakea storkii	(Standl.) Almeda		Blakea storkii (Standl.) Almeda
Blakea suaveolens	(Almeda) Penneys & Almeda		Blakea suaveolens (Almeda) Penneys & Almeda
Blakea subbarbata	(Wurdack) Penneys & Judd		Blakea subbarbata (Wurdack) Penneys & Judd
Blakea subconnata	O. Berg ex Triana		Blakea subconnata O. Berg ex Triana
Blakea subpanduriformis	E. Cotton & Matezki		Blakea subpanduriformis E. Cotton & Matezki
Blakea subscabrula	(Triana) Penneys & Judd		Blakea subscabrula (Triana) Penneys & Judd
Blakea subsessiliflora	(Wurdack) Penneys & Judd		Blakea subsessiliflora (Wurdack) Penneys & Judd
Blakea subvaginata	Wurdack		Blakea subvaginata Wurdack
Blakea superba	(Naudin) Penneys & Judd		Blakea superba (Naudin) Penneys & Judd
Blakea tapantiana	Umaña & Almeda		Blakea tapantiana Umaña & Almeda
Blakea tetramera	(Almeda) Penneys & Almeda		Blakea tetramera (Almeda) Penneys & Almeda
Blakea tetroici	(Wurdack) Penneys & Judd		Blakea tetroici (Wurdack) Penneys & Judd
Blakea toachiensis	(Wurdack) Penneys & Judd		Blakea toachiensis (Wurdack) Penneys & Judd
Blakea trianae	(Cogn.) Penneys & Judd		Blakea trianae (Cogn.) Penneys & Judd
Blakea trinervia	L.		Blakea trinervia L.
Blakea truncata	Gleason		Blakea truncata Gleason
Blakea tuberculata	Donn. Sm.		Blakea tuberculata Donn. Sm.
Blakea unguiculata	Almeda & Penneys		Blakea unguiculata Almeda & Penneys
Blakea urbaniana	Cogn.		Blakea urbaniana Cogn.
Blakea vallensis	Wurdack		Blakea vallensis Wurdack
Blakea venusta	Kriebel, Almeda & A. Estrada		Blakea venusta Kriebel, Almeda & A. Estrada
Blakea verrucosa	(Wurdack) Penneys & Judd		Blakea verrucosa (Wurdack) Penneys & Judd
Blakea villosa	Cogn.		Blakea villosa Cogn.
Blakea watsonii	(Cogn.) Penneys & Almeda		Blakea watsonii (Cogn.) Penneys & Almeda
Blakea wilburiana	Almeda		Blakea wilburiana Almeda
Blakea wilsoniorum	Almeda		Blakea wilsoniorum Almeda
Boyania ayangannae	Wurdack		Boyania ayangannae Wurdack
Boyania colombiana	H. Mend.		Boyania colombiana H. Mend.
Brachyotum alpinum	Cogn.		Brachyotum alpinum Cogn.
Brachyotum andreanum	Cogn.		Brachyotum andreanum Cogn.
Brachyotum angustifolium	Wurdack		Brachyotum angustifolium Wurdack
Brachyotum azuayense	Wurdack		Brachyotum azuayense Wurdack
Brachyotum barbeyanum	Cogn.		Brachyotum barbeyanum Cogn.
Brachyotum benthamianum	Triana		Brachyotum benthamianum Triana
Brachyotum campanulare	(Bonpl.) Triana		Brachyotum campanulare (Bonpl.) Triana
Brachyotum campii	Wurdack		Brachyotum campii Wurdack
Brachyotum cernuum	(Bonpl.) Triana		Brachyotum cernuum (Bonpl.) Triana
Brachyotum cogniauxii	Wurdack		Brachyotum cogniauxii Wurdack
Brachyotum confertum	(Bonpl.) Triana		Brachyotum confertum (Bonpl.) Triana
Brachyotum coronatum	(Triana) Wurdack		Brachyotum coronatum (Triana) Wurdack
Brachyotum cutervoanum	Wurdack		Brachyotum cutervoanum Wurdack
Brachyotum ecuadorense	Wurdack		Brachyotum ecuadorense Wurdack
Brachyotum fictum	Wurdack		Brachyotum fictum Wurdack
Brachyotum figueroae	J.F. Macbr.		Brachyotum figueroae J.F. Macbr.
Brachyotum fraternum	Wurdack		Brachyotum fraternum Wurdack
Brachyotum gleasonii	Wurdack		Brachyotum gleasonii Wurdack
Brachyotum gracilescens	Triana		Brachyotum gracilescens Triana
Brachyotum grisebachii	Cogn.		Brachyotum grisebachii Cogn.
Brachyotum harlingii	Wurdack		Brachyotum harlingii Wurdack
Brachyotum huancavelicae	Wurdack		Brachyotum huancavelicae Wurdack
Brachyotum incrassatum	E. Cotton		Brachyotum incrassatum E. Cotton
Brachyotum intermedium	Wurdack		Brachyotum intermedium Wurdack
Brachyotum jamesonii	Triana		Brachyotum jamesonii Triana
Brachyotum johannes-julii	E. Cotton		Brachyotum johannes-julii E. Cotton
Brachyotum ledifolium	(Desr.) Triana		Brachyotum ledifolium (Desr.) Triana
Brachyotum lindenii	Cogn.		Brachyotum lindenii Cogn.
Brachyotum longisepalum	Wurdack		Brachyotum longisepalum Wurdack
Brachyotum lutescens	(Ruiz & Pav.) Triana		Brachyotum lutescens (Ruiz & Pav.) Triana
Brachyotum lycopodioides	Triana		Brachyotum lycopodioides Triana
Brachyotum lymphatum	Wurdack		Brachyotum lymphatum Wurdack
Brachyotum markgrafii	Wurdack		Brachyotum markgrafii Wurdack
Brachyotum maximowiczii	Cogn.		Brachyotum maximowiczii Cogn.
Brachyotum microdon	(Naudin) Triana		Brachyotum microdon (Naudin) Triana
Brachyotum multinervium	Wurdack		Brachyotum multinervium Wurdack
Brachyotum multituberculatum	Wurdack		Brachyotum multituberculatum Wurdack
Brachyotum naudinii	Triana		Brachyotum naudinii Triana
Brachyotum nutans	Gleason		Brachyotum nutans Gleason
Brachyotum parvifolium	Cogn.		Brachyotum parvifolium Cogn.
Brachyotum quinquenerve	(Ruiz & Pav.) Triana		Brachyotum quinquenerve (Ruiz & Pav.) Triana
Brachyotum radula	Triana		Brachyotum radula Triana
Brachyotum rosmarinifolium	(Ruiz & Pav.) Triana		Brachyotum rosmarinifolium (Ruiz & Pav.) Triana
Brachyotum rostratum	(Naudin) Triana		Brachyotum rostratum (Naudin) Triana
Brachyotum rotundifolium	Cogn.		Brachyotum rotundifolium Cogn.
Brachyotum rugosum	Wurdack		Brachyotum rugosum Wurdack
Brachyotum russatum	E. Cotton		Brachyotum russatum E. Cotton
Brachyotum sanguinolentum	(Naudin) Triana		Brachyotum sanguinolentum (Naudin) Triana
Brachyotum sertulatum	C. Ulloa		Brachyotum sertulatum C. Ulloa
Brachyotum strigosum	(L. f.) Triana		Brachyotum strigosum (L. f.) Triana
Brachyotum trichocalyx	Triana		Brachyotum trichocalyx Triana
Brachyotum tyrianthinum	J.F. Macbr.		Brachyotum tyrianthinum J.F. Macbr.
Brachyotum uribei	Wurdack		Brachyotum uribei Wurdack
Brachyotum virescens	(Cogn.) Wurdack		Brachyotum virescens (Cogn.) Wurdack
Brachyotum weberbaueri	Cogn.		Brachyotum weberbaueri Cogn.
Brasilianthus carajensis	Almeda & Michelang.		Brasilianthus carajensis Almeda & Michelang.
Bucquetia glutinosa	(L. f.) DC.		Bucquetia glutinosa (L. f.) DC.
Bucquetia nigritella	(Naudin) Triana		Bucquetia nigritella (Naudin) Triana
Bucquetia vernicosa	Gleason		Bucquetia vernicosa Gleason
Cambessedesia angelana	Fidanza & Almeda		Cambessedesia angelana Fidanza & Almeda
Cambessedesia atropurpurea	A.B. Martins		Cambessedesia atropurpurea A.B. Martins
Cambessedesia cambessedesioides	(Wurdack) A.B. Martins		Cambessedesia cambessedesioides (Wurdack) A.B. Martins
Cambessedesia corymbosa	Mart. & Schrank ex DC.		Cambessedesia corymbosa Mart. & Schrank ex DC.
Cambessedesia eichleri	Cogn.		Cambessedesia eichleri Cogn.
Cambessedesia espora	(A. St.-Hil. ex Bonpl.) DC.		Cambessedesia espora (A. St.-Hil. ex Bonpl.) DC.
Cambessedesia glaziovii	Cogn. ex A.B. Martins		Cambessedesia glaziovii Cogn. ex A.B. Martins
Cambessedesia gracilis	Wurdack		Cambessedesia gracilis Wurdack
Cambessedesia harleyi	Wurdack		Cambessedesia harleyi Wurdack
Cambessedesia hermogenesii	A.B. Martins		Cambessedesia hermogenesii A.B. Martins
Cambessedesia hilariana	(Kunth) DC.		Cambessedesia hilariana (Kunth) DC.
Cambessedesia latevenosa	Mart. ex DC.		Cambessedesia latevenosa Mart. ex DC.
Cambessedesia membranacea	Gardner		Cambessedesia membranacea Gardner
Cambessedesia pityrophylla	(DC.) A.B. Martins		Cambessedesia pityrophylla (DC.) A.B. Martins
Cambessedesia purpurata	Schrank & Mart. ex DC.		Cambessedesia purpurata Schrank & Mart. ex DC.
Cambessedesia regnelliana	Cogn.		Cambessedesia regnelliana Cogn.
Cambessedesia rupestris	A.B. Martins		Cambessedesia rupestris A.B. Martins
Cambessedesia salviifolia	(Cham.) A.B. Martins		Cambessedesia salviifolia (Cham.) A.B. Martins
Cambessedesia semidecandra	A. St.-Hil. ex A.B. Martins		Cambessedesia semidecandra A. St.-Hil. ex A.B. Martins
Cambessedesia striatella	(Naudin) A.B. Martins		Cambessedesia striatella (Naudin) A.B. Martins
Cambessedesia tenuis	Markgr.		Cambessedesia tenuis Markgr.
Cambessedesia tiradentensis	R.J.V. Alves, Rutter, R. A. & A.B. Martins		Cambessedesia tiradentensis R.J.V. Alves, Rutter, R. A. & A.B. Martins
Cambessedesia uncinata	Fidanza & Almeda		Cambessedesia uncinata Fidanza & Almeda
Cambessedesia weddellii	Naudin		Cambessedesia weddellii Naudin
Cambessedesia wurdackii	A.B. Martins		Cambessedesia wurdackii A.B. Martins
Castratella piloselloides	Naudin		Castratella piloselloides Naudin
Castratella rosea	Gleason		Castratella rosea Gleason
Centradenia floribunda	Planch.		Centradenia floribunda Planch.
Centradenia grandifolia	(Schltdl.) Endl.		Centradenia grandifolia (Schltdl.) Endl.
Centradenia inaequilateralis	(Schltdl. & Cham.) G. Don		Centradenia inaequilateralis (Schltdl. & Cham.) G. Don
Centradenia paradoxa	(Kraenzl.) Almeda		Centradenia paradoxa (Kraenzl.) Almeda
Centradeniastrum album	Gleason		Centradeniastrum album Gleason
Centradeniastrum roseum	Cogn.		Centradeniastrum roseum Cogn.
Centronia laurifolia	D. Don		Centronia laurifolia D. Don
Centronia neblinae	Wurdack		Centronia neblinae Wurdack
Centronia reticulata	Triana		Centronia reticulata Triana
Centronia sessilifolia	Cogn.		Centronia sessilifolia Cogn.
Centronia vaupesana	Wurdack		Centronia vaupesana Wurdack
Chaetogastra adenophora	(Cogn.) P.J.F. Guim. & Michelang.		Chaetogastra adenophora (Cogn.) P.J.F. Guim. & Michelang.
Chaetogastra alata	P.J.F.Guim. & Michelang.		Chaetogastra alata P.J.F.Guim. & Michelang.
Chaetogastra almedae	(Todzia) P.J.F. Guim. & Michelang.		Chaetogastra almedae (Todzia) P.J.F. Guim. & Michelang.
Chaetogastra anderssonii	(Wurdack) P.J.F. Guim. & Michelang.		Chaetogastra anderssonii (Wurdack) P.J.F. Guim. & Michelang.
Chaetogastra andreana	(Cogn.) P.J.F. Guim. & Michelang.		Chaetogastra andreana (Cogn.) P.J.F. Guim. & Michelang.
Chaetogastra araneicalyx	(de Santiago) P.J.F. Guim. & Michelang.		Chaetogastra araneicalyx (de Santiago) P.J.F. Guim. & Michelang.
Chaetogastra arthrostemmoides	(Cogn.) P.J.F. Guim. & Michelang.		Chaetogastra arthrostemmoides (Cogn.) P.J.F. Guim. & Michelang.
Chaetogastra asperifolia	(Cogn.) P.J.F. Guim. & Michelang.		Chaetogastra asperifolia (Cogn.) P.J.F. Guim. & Michelang.
Chaetogastra aurea	(Cogn.) P.J.F. Guim. & Michelang.		Chaetogastra aurea (Cogn.) P.J.F. Guim. & Michelang.
Chaetogastra brittoniana	(Cogn. ex Rusby) P.J.F. Guim. & Michelang.		Chaetogastra brittoniana (Cogn. ex Rusby) P.J.F. Guim. & Michelang.
Chaetogastra campii	(Wurdack) P.J.F. Guim. & Michelang.		Chaetogastra campii (Wurdack) P.J.F. Guim. & Michelang.
Chaetogastra capitata	(Naudin) P.J.F. Guim. & Michelang.		Chaetogastra capitata (Naudin) P.J.F. Guim. & Michelang.
Chaetogastra cerastifolia	(Naudin) P.J.F. Guim. & Michelang.		Chaetogastra cerastifolia (Naudin) P.J.F. Guim. & Michelang.
Chaetogastra chamaecistus	Sieber ex Grisebach		Chaetogastra chamaecistus Sieber ex Grisebach
Chaetogastra chironioides	Grisebach		Chaetogastra chironioides Grisebach
Chaetogastra ciliaris	DC.		Chaetogastra ciliaris DC.
Chaetogastra cisplatensis	(Cogn.) P.J.F. Guim. & Michelang.		Chaetogastra cisplatensis (Cogn.) P.J.F. Guim. & Michelang.
Chaetogastra cistoides	Griseb.		Chaetogastra cistoides Griseb.
Chaetogastra citrina	(Naudin) P.J.F. Guim. & Michelang.		Chaetogastra citrina (Naudin) P.J.F. Guim. & Michelang.
Chaetogastra clinopodifolia	DC.		Chaetogastra clinopodifolia DC.
Chaetogastra confertiflora	(Naudin) P.J.F. Guim. & Michelang.		Chaetogastra confertiflora (Naudin) P.J.F. Guim. & Michelang.
Chaetogastra congestiflora	(Todzia) P.J.F. Guim. & Michelang.		Chaetogastra congestiflora (Todzia) P.J.F. Guim. & Michelang.
Chaetogastra connata	(Gleason ex Todzia) P.J.F. Guim. & Michelang.		Chaetogastra connata (Gleason ex Todzia) P.J.F. Guim. & Michelang.
Chaetogastra cordeiroi	F.S. Mey. & R. Goldenb.		Chaetogastra cordeiroi F.S. Mey. & R. Goldenb.
Chaetogastra cornuta	(Gleason) P.J.F. Guim. & Michelang.		Chaetogastra cornuta (Gleason) P.J.F. Guim. & Michelang.
Chaetogastra crassilfolia	F.S.Mey. & R.Goldenb.		Chaetogastra crassilfolia F.S.Mey. & R.Goldenb.
Chaetogastra cristaensis	F.S.Mey. & R.Goldenb.		Chaetogastra cristaensis F.S.Mey. & R.Goldenb.
Chaetogastra debilis	Cham.		Chaetogastra debilis Cham.
Chaetogastra decora	(Gleason) P.J.F. Guim. & Michelang.		Chaetogastra decora (Gleason) P.J.F. Guim. & Michelang.
Chaetogastra dimorphylla	(Gleason) P.J.F. Guim. & Michelang.		Chaetogastra dimorphylla (Gleason) P.J.F. Guim. & Michelang.
Chaetogastra durangensis	(Standl.) P.J.F. Guim. & Michelang.		Chaetogastra durangensis (Standl.) P.J.F. Guim. & Michelang.
Chaetogastra echinata	(Ruiz et Pav.) DC.		Chaetogastra echinata (Ruiz et Pav.) DC.
Chaetogastra erioclada	(Triana) P.J.F. Guim. & Michelang.		Chaetogastra erioclada (Triana) P.J.F. Guim. & Michelang.
Chaetogastra excoriata	(Cogn.) P.J.F. Guim. & Michelang.		Chaetogastra excoriata (Cogn.) P.J.F. Guim. & Michelang.
Chaetogastra ferrariana	(Cogn.) P.J.F. Guim. & Michelang.		Chaetogastra ferrariana (Cogn.) P.J.F. Guim. & Michelang.
Chaetogastra fulvipilis	(Cogn.) P.J.F. Guim. & Michelang.		Chaetogastra fulvipilis (Cogn.) P.J.F. Guim. & Michelang.
Chaetogastra galeottiana	(Naudin) P.J.F. Guim. & Michelang.		Chaetogastra galeottiana (Naudin) P.J.F. Guim. & Michelang.
Chaetogastra gayana	(Naudin) P.J.F. Guim. & Michelang.		Chaetogastra gayana (Naudin) P.J.F. Guim. & Michelang.
Chaetogastra geitneriana	Schltdl.		Chaetogastra geitneriana Schltdl.
Chaetogastra gracilis	DC.		Chaetogastra gracilis DC.
Chaetogastra grossa	(L. f.) P.J.F. Guim. & Michelang.		Chaetogastra grossa (L. f.) P.J.F. Guim. & Michelang.
Chaetogastra hassleri	(Cogn.) P.J.F. Guim. & Michelang.		Chaetogastra hassleri (Cogn.) P.J.F. Guim. & Michelang.
Chaetogastra herbacea	(DC.) P.J.F. Guim. & Michelang.		Chaetogastra herbacea (DC.) P.J.F. Guim. & Michelang.
Chaetogastra herincquiana	(Cogn.) P.J.F. Guim. & Michelang.		Chaetogastra herincquiana (Cogn.) P.J.F. Guim. & Michelang.
Chaetogastra herzogii	(Cogn.) P.J.F. Guim. & Michelang.		Chaetogastra herzogii (Cogn.) P.J.F. Guim. & Michelang.
Chaetogastra hieracioides	DC.		Chaetogastra hieracioides DC.
Chaetogastra hintonii	Gleason ex P.J.F. Guim. & Michelang.		Chaetogastra hintonii Gleason ex P.J.F. Guim. & Michelang.
Chaetogastra hutchisonii	(Wurdack) P.J.F. Guim. & Michelang.		Chaetogastra hutchisonii (Wurdack) P.J.F. Guim. & Michelang.
Chaetogastra incarum	(Gleason) P.J.F. Guim. & Michelang.		Chaetogastra incarum (Gleason) P.J.F. Guim. & Michelang.
Chaetogastra inconstans	(Vahl.) P. J. F. Guim. & Michelang.		Chaetogastra inconstans (Vahl.) P. J. F. Guim. & Michelang.
Chaetogastra kingii	(Wurdack) P.J.F. Guim. & Michelang.		Chaetogastra kingii (Wurdack) P.J.F. Guim. & Michelang.
Chaetogastra kunhardtii	(Gleason) P.J.F. Guim. & Michelang.		Chaetogastra kunhardtii (Gleason) P.J.F. Guim. & Michelang.
Chaetogastra laevis	(Cogn.) P.J.F. Guim. & Michelang.		Chaetogastra laevis (Cogn.) P.J.F. Guim. & Michelang.
Chaetogastra lancifolia	(Wurdack) P.J.F. Guim. & Michelang.		Chaetogastra lancifolia (Wurdack) P.J.F. Guim. & Michelang.
Chaetogastra latibracteolata	(P.G.Wilson) P.J.F. Guim. & Michelang.		Chaetogastra latibracteolata (P.G.Wilson) P.J.F. Guim. & Michelang.
Chaetogastra latifolia	(Naudin) P.J.F. Guim. & Michelang.		Chaetogastra latifolia (Naudin) P.J.F. Guim. & Michelang.
Chaetogastra laxa	(Desr.) P.J.F. Guim. & Michelang.		Chaetogastra laxa (Desr.) P.J.F. Guim. & Michelang.
Chaetogastra longifolia	(Vahl.) DC.		Chaetogastra longifolia (Vahl.) DC.
Chaetogastra longipilosa	(Cogn.) P.J.F. Guim. & Michelang.		Chaetogastra longipilosa (Cogn.) P.J.F. Guim. & Michelang.
Chaetogastra longisepala	(Cogn.) P.J.F. Guim. & Michelang.		Chaetogastra longisepala (Cogn.) P.J.F. Guim. & Michelang.
Chaetogastra longistyla	(Cogn.) P.J.F. Guim. & Michelang.		Chaetogastra longistyla (Cogn.) P.J.F. Guim. & Michelang.
Chaetogastra macvaughii	(Todzia) P.J.F. Guim. & Michelang.		Chaetogastra macvaughii (Todzia) P.J.F. Guim. & Michelang.
Chaetogastra mariae	(Wurdack) P.J.F. Guim. & Michelang.		Chaetogastra mariae (Wurdack) P.J.F. Guim. & Michelang.
Chaetogastra membranifolia	(Cogn. & Rusby) P.J.F. Guim. & Michelang.		Chaetogastra membranifolia (Cogn. & Rusby) P.J.F. Guim. & Michelang.
Chaetogastra minor	(Cogn.) P.J.F. Guim. & Michelang.		Chaetogastra minor (Cogn.) P.J.F. Guim. & Michelang.
Chaetogastra mollis	(Bonpl.) DC.		Chaetogastra mollis (Bonpl.) DC.
Chaetogastra montana	P.J.F. Guim. & Michelang.		Chaetogastra montana P.J.F. Guim. & Michelang.
Chaetogastra monticola	(Naudin) P.J.F. Guim. & Michelang.		Chaetogastra monticola (Naudin) P.J.F. Guim. & Michelang.
Chaetogastra nanifolia	(Todzia) P.J.F. Guim. & Michelang.		Chaetogastra nanifolia (Todzia) P.J.F. Guim. & Michelang.
Chaetogastra naudiniana	Decne.		Chaetogastra naudiniana Decne.
Chaetogastra nitida	(Graham) P.J.F. Guim. & Michelang.		Chaetogastra nitida (Graham) P.J.F. Guim. & Michelang.
Chaetogastra obtusifolia	(Cogn.) P.J.F. Guim. & Michelang.		Chaetogastra obtusifolia (Cogn.) P.J.F. Guim. & Michelang.
Chaetogastra oligantha	(Gleason) P.J.F. Guim. & Michelang.		Chaetogastra oligantha (Gleason) P.J.F. Guim. & Michelang.
Chaetogastra orbignyana	(Naudin) P.J.F. Guim. & Michelang.		Chaetogastra orbignyana (Naudin) P.J.F. Guim. & Michelang.
Chaetogastra oroensis	(Gleason) P.J.F. Guim. & Michelang.		Chaetogastra oroensis (Gleason) P.J.F. Guim. & Michelang.
Chaetogastra panicularis	Naudin		Chaetogastra panicularis Naudin
Chaetogastra paratropica	(Griseb.) P.J.F. Guim. & Michelang.		Chaetogastra paratropica (Griseb.) P.J.F. Guim. & Michelang.
Chaetogastra parviflora	(Cogn.) P.J.F. Guim. & Michelang.		Chaetogastra parviflora (Cogn.) P.J.F. Guim. & Michelang.
Chaetogastra patens	(Todzia) P.J.F. Guim. & Michelang.		Chaetogastra patens (Todzia) P.J.F. Guim. & Michelang.
Chaetogastra pauciflora	P.J.F. Guim. & Michelang.		Chaetogastra pauciflora P.J.F. Guim. & Michelang.
Chaetogastra pendula	(Cogn.) P.J.F. Guim. & Michelang.		Chaetogastra pendula (Cogn.) P.J.F. Guim. & Michelang.
Chaetogastra pentamera	(Ule) P.J.F. Guim. & Michelang.		Chaetogastra pentamera (Ule) P.J.F. Guim. & Michelang.
Chaetogastra pleromoides	(Naudin) P.J.F. Guim. & Michelang.		Chaetogastra pleromoides (Naudin) P.J.F. Guim. & Michelang.
Chaetogastra pulcherrima	(Gleason) P.J.F. Guim. & Michelang.		Chaetogastra pulcherrima (Gleason) P.J.F. Guim. & Michelang.
Chaetogastra purpurascens	(Cogn.) P.J.F. Guim. & Michelang.		Chaetogastra purpurascens (Cogn.) P.J.F. Guim. & Michelang.
Chaetogastra purpusii	(Brandegee) P.J.F. Guim. & Michelang.		Chaetogastra purpusii (Brandegee) P.J.F. Guim. & Michelang.
Chaetogastra repens	(Wurdack) P.J.F. Guim. & Michelang.		Chaetogastra repens (Wurdack) P.J.F. Guim. & Michelang.
Chaetogastra rhynchantherifolia	(Cogn.) P.J.F. Guim. & Michelang.		Chaetogastra rhynchantherifolia (Cogn.) P.J.F. Guim. & Michelang.
Chaetogastra riograndensis	F.S. Mey.		Chaetogastra riograndensis F.S. Mey.
Chaetogastra rojasii	(Cogn.) P.J.F. Guim. & Michelang.		Chaetogastra rojasii (Cogn.) P.J.F. Guim. & Michelang.
Chaetogastra roseotincta	(Todzia) P.J.F. Guim. & Michelang.		Chaetogastra roseotincta (Todzia) P.J.F. Guim. & Michelang.
Chaetogastra rufipilis	(Schltdl.) Walp.		Chaetogastra rufipilis (Schltdl.) Walp.
Chaetogastra rupestris	(Cogn.) P.J.F. Guim. & Michelang.		Chaetogastra rupestris (Cogn.) P.J.F. Guim. & Michelang.
Chaetogastra rusbyi	(Cogn.) P.J.F. Guim. & Michelang.		Chaetogastra rusbyi (Cogn.) P.J.F. Guim. & Michelang.
Chaetogastra sandiensis	(Wurdack) P.J.F. Guim. & Michelang.		Chaetogastra sandiensis (Wurdack) P.J.F. Guim. & Michelang.
Chaetogastra saxicola	(F.S.Mey., P.J.F.Guim. & R.Goldenb.) P.J.F. Guim. & Michelang.		Chaetogastra saxicola (F.S.Mey., P.J.F.Guim. & R.Goldenb.) P.J.F. Guim. & Michelang.
Chaetogastra saxosa	(Gleason) P.J.F. Guim. & Michelang.		Chaetogastra saxosa (Gleason) P.J.F. Guim. & Michelang.
Chaetogastra scabriuscula	(Schlecht.) P.J.F. Guim. & Michelang.		Chaetogastra scabriuscula (Schlecht.) P.J.F. Guim. & Michelang.
Chaetogastra schiedeana	(Schltdl. & Cham.) Walp.		Chaetogastra schiedeana (Schltdl. & Cham.) Walp.
Chaetogastra sebastianapolitana	(Raddi) P.J.F. Guim. & Michelang.		Chaetogastra sebastianapolitana (Raddi) P.J.F. Guim. & Michelang.
Chaetogastra sericea	(de Santiago) P.J.F. Guim. & Michelang.		Chaetogastra sericea (de Santiago) P.J.F. Guim. & Michelang.
Chaetogastra simplicicaulis	(Naudin) P.J.F. Guim. & Michelang.		Chaetogastra simplicicaulis (Naudin) P.J.F. Guim. & Michelang.
Chaetogastra sinaloensis	(Todzia) P.J.F. Guim. & Michelang.		Chaetogastra sinaloensis (Todzia) P.J.F. Guim. & Michelang.
Chaetogastra solmsii	(Cogn.) P.J.F. Guim. & Michelang.		Chaetogastra solmsii (Cogn.) P.J.F. Guim. & Michelang.
Chaetogastra stenopetala	(Triana) P.J.F. Guim. & Michelang.		Chaetogastra stenopetala (Triana) P.J.F. Guim. & Michelang.
Chaetogastra stenophylla	(Cogn.) P.J.F. Guim. & Michelang.		Chaetogastra stenophylla (Cogn.) P.J.F. Guim. & Michelang.
Chaetogastra tetrapetala	(Cogn.) P.J.F. Guim. & Michelang.		Chaetogastra tetrapetala (Cogn.) P.J.F. Guim. & Michelang.
Chaetogastra thulia	(Todzia) P.J.F. Guim. & Michelang.		Chaetogastra thulia (Todzia) P.J.F. Guim. & Michelang.
Chaetogastra tortuosa	(Bonpl.) DC.		Chaetogastra tortuosa (Bonpl.) DC.
Chaetogastra triflora	(Gleason) P. J. F. Guim. & Michelang.		Chaetogastra triflora (Gleason) P. J. F. Guim. & Michelang.
Chaetogastra trinitensis	(Cogn.) P.J.F. Guim. & Michelang.		Chaetogastra trinitensis (Cogn.) P.J.F. Guim. & Michelang.
Chaetogastra urbanii	(Cogn.) P.J.F. Guim. & Michelang.		Chaetogastra urbanii (Cogn.) P.J.F. Guim. & Michelang.
Chaetogastra venosa	(Gleason) P.J.F. Guim. & Michelang.		Chaetogastra venosa (Gleason) P.J.F. Guim. & Michelang.
Chaetogastra versicolor	(Lindl.) P.J.F. Guim. & Michelang.		Chaetogastra versicolor (Lindl.) P.J.F. Guim. & Michelang.
Chaetogastra violacea	(Cogn.) P.J.F. Guim. & Michelang.		Chaetogastra violacea (Cogn.) P.J.F. Guim. & Michelang.
Chaetogastra wasshausenii	(Wurdack) P.J.F. Guim. & Michelang.		Chaetogastra wasshausenii (Wurdack) P.J.F. Guim. & Michelang.
Chaetogastra weberbaueri	(Cogn.) P.J.F. Guim. & Michelang.		Chaetogastra weberbaueri (Cogn.) P.J.F. Guim. & Michelang.
Chaetolepis alpina	Naudin		Chaetolepis alpina Naudin
Chaetolepis anisandra	Naudin		Chaetolepis anisandra Naudin
Chaetolepis cufodontisii	Standl.		Chaetolepis cufodontisii Standl.
Chaetolepis lindeniana	(Naudin) Triana		Chaetolepis lindeniana (Naudin) Triana
Chaetolepis loricarella	Triana		Chaetolepis loricarella Triana
Chaetolepis microphylla	(Bonpl.) Miq.		Chaetolepis microphylla (Bonpl.) Miq.
Chaetolepis perijensis	Wurdack		Chaetolepis perijensis Wurdack
Chaetolepis phelpsiae	Gleason		Chaetolepis phelpsiae Gleason
Chaetolepis santamartensis	Wurdack		Chaetolepis santamartensis Wurdack
Chaetolepis sessilis	Pittier		Chaetolepis sessilis Pittier
Chaetostoma albiflorum	(Naudin) Koschnitzke & A.B. Martins		Chaetostoma albiflorum (Naudin) Koschnitzke & A.B. Martins
Chaetostoma armatum	(Spreng.) Cogn.		Chaetostoma armatum (Spreng.) Cogn.
Chaetostoma cupressinum	(D. Don) Koschnitzke & A.B. Martins		Chaetostoma cupressinum (D. Don) Koschnitzke & A.B. Martins
Chaetostoma fastigiatum	Naudin		Chaetostoma fastigiatum Naudin
Chaetostoma flavum	Koschnitzke & A.B. Martins		Chaetostoma flavum Koschnitzke & A.B. Martins
Chaetostoma glaziovii	Cogn.		Chaetostoma glaziovii Cogn.
Chaetostoma hexapetalum	D. Nunes, D.O. Diniz, Koschnitzke & M.J. Silva		Chaetostoma hexapetalum D. Nunes, D.O. Diniz, Koschnitzke & M.J. Silva
Chaetostoma inerme	Naudin		Chaetostoma inerme Naudin
Chaetostoma riedelianum	Cogn.		Chaetostoma riedelianum Cogn.
Chaetostoma scoparia	Cogn.		Chaetostoma scoparia Cogn.
Chaetostoma selagineum	(Naudin) Koschnitzke & A.B. Martins		Chaetostoma selagineum (Naudin) Koschnitzke & A.B. Martins
Chaetostoma stenocladon	(Naudin) Koschnitzke & A.B. Martins		Chaetostoma stenocladon (Naudin) Koschnitzke & A.B. Martins
Chalybea brevipedunculata	Penneys, C. Ulloa & D. Fernández		Chalybea brevipedunculata Penneys, C. Ulloa & D. Fernández
Chalybea calyptrata	(Penneys & M.E. Morales) Penneys & M.E. Morales		Chalybea calyptrata (Penneys & M.E. Morales) Penneys & M.E. Morales
Chalybea corymbifera	Naudin		Chalybea corymbifera Naudin
Chalybea ecuadorensis	(Wurdack) Penneys & M.E. Morales		Chalybea ecuadorensis (Wurdack) Penneys & M.E. Morales
Chalybea kirkbridei	(Wurdack) M.E. Morales & Penneys		Chalybea kirkbridei (Wurdack) M.E. Morales & Penneys
Chalybea macrocarpa	(L. Uribe) M.E. Morales & Penneys		Chalybea macrocarpa (L. Uribe) M.E. Morales & Penneys
Chalybea minor	(L. Uribe) M.E. Morales & Penneys		Chalybea minor (L. Uribe) M.E. Morales & Penneys
Chalybea mutisiana	(L. Uribe) M.E. Morales & Penneys		Chalybea mutisiana (L. Uribe) M.E. Morales & Penneys
Chalybea occidentalis	(Lozano & N. Ruiz-R.) M.E. Morales & Penneys		Chalybea occidentalis (Lozano & N. Ruiz-R.) M.E. Morales & Penneys
Chalybea penduliflora	(Wurdack) M.E. Morales & Penneys		Chalybea penduliflora (Wurdack) M.E. Morales & Penneys
Chalybea peruviana	M.E. Morales & Penneys		Chalybea peruviana M.E. Morales & Penneys
Clidemia ferox	Gleason		Clidemia ferox Gleason
Clidemia minutiflora	(Triana) Cogn.		Clidemia minutiflora (Triana) Cogn.
Comolia anomala	Pittier		Comolia anomala Pittier
Comolia berberifolia	(Humb. & Bonpl.) DC.		Comolia berberifolia (Humb. & Bonpl.) DC.
Comolia bracteosa	Huber		Comolia bracteosa Huber
Comolia latifolia	(Aubl.) Cogn.		Comolia latifolia (Aubl.) Cogn.
Comolia leptophylla	(Bonpl.) Naudin		Comolia leptophylla (Bonpl.) Naudin
Comolia microphylla	Benth.		Comolia microphylla Benth.
Comolia nummularioides	(Bonpl.) Naudin		Comolia nummularioides (Bonpl.) Naudin
Comolia ovalifolia	(DC.) Triana		Comolia ovalifolia (DC.) Triana
Comolia prostrata	Wurdack		Comolia prostrata Wurdack
Comolia serpyllacea	Wurdack		Comolia serpyllacea Wurdack
Comolia sessilis	(Spreng.) Triana		Comolia sessilis (Spreng.) Triana
Comolia villosa	(Aubl.) Triana		Comolia villosa (Aubl.) Triana
Comoliopsis coriacea	(Gleason) M.J.R.Rocha & P.J.F.Guim.		Comoliopsis coriacea (Gleason) M.J.R.Rocha & P.J.F.Guim.
Comoliopsis montana	(Gleason) M.J.R.Rocha & P.J.F.Guim.		Comoliopsis montana (Gleason) M.J.R.Rocha & P.J.F.Guim.
Comoliopsis neblinae	Wurdack		Comoliopsis neblinae Wurdack
Desmoscelis calcarata	(Naudin) Triana		Desmoscelis calcarata (Naudin) Triana
Desmoscelis villosa	(Aubl.) Naudin		Desmoscelis villosa (Aubl.) Naudin
Dicrananthera hedyotoideae	C.Presl.		Dicrananthera hedyotoideae C.Presl.
Diolena boliviensis	Cogn.		Diolena boliviensis Cogn.
Eriocnema acaulis	(Cham.) Triana		Eriocnema acaulis (Cham.) Triana
Ernestia adenotricha	L. Uribe		Ernestia adenotricha L. Uribe
Ernestia blackii	Brade & Markgr.		Ernestia blackii Brade & Markgr.
Ernestia cataractae	Tutin		Ernestia cataractae Tutin
Ernestia confertiflora	Wurdack		Ernestia confertiflora Wurdack
Ernestia goudotii	Triana		Ernestia goudotii Triana
Ernestia granvillei	Wurdack		Ernestia granvillei Wurdack
Ernestia karuruana	Wurdack		Ernestia karuruana Wurdack
Ernestia lata	Gleason		Ernestia lata Gleason
Ernestia maguirei	Wurdack		Ernestia maguirei Wurdack
Ernestia minor	Gleason		Ernestia minor Gleason
Ernestia ovata	Cogn.		Ernestia ovata Cogn.
Ernestia quadriseta	O. Berg ex Triana		Ernestia quadriseta O. Berg ex Triana
Ernestia rubra	Pulle		Ernestia rubra Pulle
Ernestia tenella	(Bonpl.) DC.		Ernestia tenella (Bonpl.) DC.
Fritzschia anisostemon	Cham.		Fritzschia anisostemon Cham.
Fritzschia atropurpurea	D.Nunes, M.J.R.Rocha & P.J.F.Guim.		Fritzschia atropurpurea D.Nunes, M.J.R.Rocha & P.J.F.Guim.
Fritzschia cordifolia	R.Romero, D.Nunes & M.J.R.Rocha		Fritzschia cordifolia R.Romero, D.Nunes & M.J.R.Rocha
Fritzschia edmundoi	(Brade) M.J.R.Rocha & P.J.F.Guim.		Fritzschia edmundoi (Brade) M.J.R.Rocha & P.J.F.Guim.
Fritzschia erecta	Cham.		Fritzschia erecta Cham.
Fritzschia furnensis	R. Romero & M. J. Rocha		Fritzschia furnensis R. Romero & M. J. Rocha
Fritzschia integrifolia	Cham.		Fritzschia integrifolia Cham.
Fritzschia lanceiflora	(DC.) M.J.R.Rocha & P.J.F.Guim.		Fritzschia lanceiflora (DC.) M.J.R.Rocha & P.J.F.Guim.
Fritzschia rupestris	R. Pacifico, Almeda & D. Nunes		Fritzschia rupestris R. Pacifico, Almeda & D. Nunes
Fritzschia sertularia	(DC.) M.J.R.Rocha & P.J.F.Guim.		Fritzschia sertularia (DC.) M.J.R.Rocha & P.J.F.Guim.
Fritzschia sessilis	(Spreng.) M.J.R.Rocha & P.J.F.Guim.		Fritzschia sessilis (Spreng.) M.J.R.Rocha & P.J.F.Guim.
Fritzschia stenodon	(Triana) M.J.R.Rocha & P.J.F.Guim.		Fritzschia stenodon (Triana) M.J.R.Rocha & P.J.F.Guim.
Graffenrieda anomala	Triana		Graffenrieda anomala Triana
Graffenrieda barahonensis	Urb.		Graffenrieda barahonensis Urb.
Graffenrieda bella	Almeda		Graffenrieda bella Almeda
Graffenrieda boliviensis	Cogn.		Graffenrieda boliviensis Cogn.
Graffenrieda calyptrelloides	Wurdack		Graffenrieda calyptrelloides Wurdack
Graffenrieda caryophyllea	Triana		Graffenrieda caryophyllea Triana
Graffenrieda caudata	Wurdack		Graffenrieda caudata Wurdack
Graffenrieda chrysandra	(Griseb.) Triana		Graffenrieda chrysandra (Griseb.) Triana
Graffenrieda cinna	J.F. Macbr.		Graffenrieda cinna J.F. Macbr.
Graffenrieda cinnoides	Gleason		Graffenrieda cinnoides Gleason
Graffenrieda colombiana	Gleason		Graffenrieda colombiana Gleason
Graffenrieda conostegioides	Triana		Graffenrieda conostegioides Triana
Graffenrieda cucullata	(Triana) L.O. Williams		Graffenrieda cucullata (Triana) L.O. Williams
Graffenrieda emarginata	(Ruiz & Pav.) Triana		Graffenrieda emarginata (Ruiz & Pav.) Triana
Graffenrieda fantastica	R.E. Schult. & L.B. Sm.		Graffenrieda fantastica R.E. Schult. & L.B. Sm.
Graffenrieda foliosa	Cogn.		Graffenrieda foliosa Cogn.
Graffenrieda fruticosa	Wurdack		Graffenrieda fruticosa Wurdack
Graffenrieda galeottii	(Naudin) L.O. Williams		Graffenrieda galeottii (Naudin) L.O. Williams
Graffenrieda gentlei	Lundell		Graffenrieda gentlei Lundell
Graffenrieda glandulosa	R. Goldenb. & Meirelles		Graffenrieda glandulosa R. Goldenb. & Meirelles
Graffenrieda goldenbergii	L.F. Lima, Baumgratz, Nic Lugh. & J.U. Santos		Graffenrieda goldenbergii L.F. Lima, Baumgratz, Nic Lugh. & J.U. Santos
Graffenrieda gracilis	(Triana) L.O. Williams		Graffenrieda gracilis (Triana) L.O. Williams
Graffenrieda grandifolia	Gleason		Graffenrieda grandifolia Gleason
Graffenrieda harlingii	Wurdack		Graffenrieda harlingii Wurdack
Graffenrieda hitchcockii	Gleason		Graffenrieda hitchcockii Gleason
Graffenrieda intermedia	Triana		Graffenrieda intermedia Triana
Graffenrieda irwinii	Wurdack		Graffenrieda irwinii Wurdack
Graffenrieda jauana	Wurdack		Graffenrieda jauana Wurdack
Graffenrieda jefensis	Almeda, Alvear & H. Mend.		Graffenrieda jefensis Almeda, Alvear & H. Mend.
Graffenrieda kralii	Wurdack		Graffenrieda kralii Wurdack
Graffenrieda laevicarpa	Michelang. & R. Goldenb.		Graffenrieda laevicarpa Michelang. & R. Goldenb.
Graffenrieda lanceolata	Gleason		Graffenrieda lanceolata Gleason
Graffenrieda latifolia	(Naudin) Triana		Graffenrieda latifolia (Naudin) Triana
Graffenrieda laurina	Triana		Graffenrieda laurina Triana
Graffenrieda limbata	Triana		Graffenrieda limbata Triana
Graffenrieda maklenkensis	H. Mend., Alvear & Almeda		Graffenrieda maklenkensis H. Mend., Alvear & Almeda
Graffenrieda maturaca	L.F. Lima, Baumgratz, Nic Lugh. & J.U. Santos		Graffenrieda maturaca L.F. Lima, Baumgratz, Nic Lugh. & J.U. Santos
Graffenrieda meridensis	Wurdack		Graffenrieda meridensis Wurdack
Graffenrieda miconioides	Naudin		Graffenrieda miconioides Naudin
Graffenrieda micrantha	(Gleason) L.O. Williams		Graffenrieda micrantha (Gleason) L.O. Williams
Graffenrieda moaensis	Wurdack		Graffenrieda moaensis Wurdack
Graffenrieda moritziana	Triana		Graffenrieda moritziana Triana
Graffenrieda obliqua	Triana		Graffenrieda obliqua Triana
Graffenrieda ottoschulzii	(Urb. & Ekman) Urb. & Ekman		Graffenrieda ottoschulzii (Urb. & Ekman) Urb. & Ekman
Graffenrieda patens	Triana		Graffenrieda patens Triana
Graffenrieda pedunculata	Gleason		Graffenrieda pedunculata Gleason
Graffenrieda penneysii	Michelang. & C. Ulloa		Graffenrieda penneysii Michelang. & C. Ulloa
Graffenrieda phoenicea	Markgr.		Graffenrieda phoenicea Markgr.
Graffenrieda polymera	Gleason		Graffenrieda polymera Gleason
Graffenrieda reticulata	Wurdack		Graffenrieda reticulata Wurdack
Graffenrieda robusta	(Cogn.) L.O. Williams		Graffenrieda robusta (Cogn.) L.O. Williams
Graffenrieda rotundifolia	(Bonpl.) DC.		Graffenrieda rotundifolia (Bonpl.) DC.
Graffenrieda rufa	Wurdack		Graffenrieda rufa Wurdack
Graffenrieda rufescens	Britton & P. Wilson		Graffenrieda rufescens Britton & P. Wilson
Graffenrieda rupestris	Ducke		Graffenrieda rupestris Ducke
Graffenrieda santamartensis	Wurdack		Graffenrieda santamartensis Wurdack
Graffenrieda scandens	(Gleason) Wurdack		Graffenrieda scandens (Gleason) Wurdack
Graffenrieda sessilifolia	Triana		Graffenrieda sessilifolia Triana
Graffenrieda sipapoana	Wurdack		Graffenrieda sipapoana Wurdack
Graffenrieda steyermarkii	Wurdack		Graffenrieda steyermarkii Wurdack
Graffenrieda tamana	Wurdack		Graffenrieda tamana Wurdack
Graffenrieda tricalcarata	Gleason		Graffenrieda tricalcarata Gleason
Graffenrieda trichanthera	Gleason		Graffenrieda trichanthera Gleason
Graffenrieda tristis	(Triana) L.O. Williams		Graffenrieda tristis (Triana) L.O. Williams
Graffenrieda uribei	Wurdack		Graffenrieda uribei Wurdack
Graffenrieda versicolor	Gleason		Graffenrieda versicolor Gleason
Graffenrieda weddellii	Naudin		Graffenrieda weddellii Naudin
Henriettea acunae	(Alain) Alain		Henriettea acunae (Alain) Alain
Henriettea aggregata	(D. Don) J.F. Macbr.		Henriettea aggregata (D. Don) J.F. Macbr.
Henriettea angustifolia	O. Berg ex Triana		Henriettea angustifolia O. Berg ex Triana
Henriettea barkeri	(Urb. & Ekman) Alain		Henriettea barkeri (Urb. & Ekman) Alain
Henriettea boliviensis	(Cogn.) Penneys, Michelang., Judd & Almeda		Henriettea boliviensis (Cogn.) Penneys, Michelang., Judd & Almeda
Henriettea bracteosa	(Wurdack) Penneys, Michelang., Judd & Almeda		Henriettea bracteosa (Wurdack) Penneys, Michelang., Judd & Almeda
Henriettea caudata	(Gleason) Penneys, Michelang., Judd & Almeda		Henriettea caudata (Gleason) Penneys, Michelang., Judd & Almeda
Henriettea ciliata	(Urb. & Ekman) Alain		Henriettea ciliata (Urb. & Ekman) Alain
Henriettea cuabae	(Urb.) Borhidi		Henriettea cuabae (Urb.) Borhidi
Henriettea cuneata	(Standl.) L.O. Williams		Henriettea cuneata (Standl.) L.O. Williams
Henriettea duckeana	(Hoehne) Penneys, Michelang., Judd & Almeda		Henriettea duckeana (Hoehne) Penneys, Michelang., Judd & Almeda
Henriettea ekmanii	(Urb.) Alain		Henriettea ekmanii (Urb.) Alain
Henriettea fascicularis	(Sw.) M. Gómez		Henriettea fascicularis (Sw.) M. Gómez
Henriettea fissanthera	(Gleason) Penneys, Michelang., Judd & Almeda		Henriettea fissanthera (Gleason) Penneys, Michelang., Judd & Almeda
Henriettea flavescens	(Aubl.) Baill.		Henriettea flavescens (Aubl.) Baill.
Henriettea gibberosa	(Urb.) Alain		Henriettea gibberosa (Urb.) Alain
Henriettea glabra	(Vell.) Penneys, Michelang., Judd & Almeda		Henriettea glabra (Vell.) Penneys, Michelang., Judd & Almeda
Henriettea gomesii	Brade		Henriettea gomesii Brade
Henriettea goudotiana	(Naudin) Penneys, Michelang., Judd & Almeda		Henriettea goudotiana (Naudin) Penneys, Michelang., Judd & Almeda
Henriettea granulata	O. Berg & Triana		Henriettea granulata O. Berg & Triana
Henriettea heteroneura	(Gleason) Penneys, Michelang., Judd & Almeda		Henriettea heteroneura (Gleason) Penneys, Michelang., Judd & Almeda
Henriettea hondurensis	(Wurdack) Penneys, Michelang., Judd & Almeda		Henriettea hondurensis (Wurdack) Penneys, Michelang., Judd & Almeda
Henriettea horridula	Pilg.		Henriettea horridula Pilg.
Henriettea hotteana	(Urb. & Ekman) Alain		Henriettea hotteana (Urb. & Ekman) Alain
Henriettea ininiensis	(Wurdack) Penneys, Michelang., Judd & Almeda		Henriettea ininiensis (Wurdack) Penneys, Michelang., Judd & Almeda
Henriettea lasiostylis	Pilg.		Henriettea lasiostylis Pilg.
Henriettea lateriflora	(Vahl) R.A. Howard & E.A. Kellogg		Henriettea lateriflora (Vahl) R.A. Howard & E.A. Kellogg
Henriettea lawrancei	(Gleason) Penneys, Michelang., Judd & Almeda		Henriettea lawrancei (Gleason) Penneys, Michelang., Judd & Almeda
Henriettea loretensis	(Gleason) J.F. Macbr.		Henriettea loretensis (Gleason) J.F. Macbr.
Henriettea lundellii	(Wurdack) Penneys, Michelang., Judd & Almeda		Henriettea lundellii (Wurdack) Penneys, Michelang., Judd & Almeda
Henriettea macfadyenii	(Triana) Alain		Henriettea macfadyenii (Triana) Alain
Henriettea maguirei	(Wurdack) Penneys, Michelang., Judd & Almeda		Henriettea maguirei (Wurdack) Penneys, Michelang., Judd & Almeda
Henriettea manarae	(Wurdack) Penneys, Michelangeli, Judd & Almeda		Henriettea manarae (Wurdack) Penneys, Michelangeli, Judd & Almeda
Henriettea maroniensis	Sagot		Henriettea maroniensis Sagot
Henriettea martiusii	(DC.) Naudin		Henriettea martiusii (DC.) Naudin
Henriettea megaloclada	(Urb. & Ekman) Alain		Henriettea megaloclada (Urb. & Ekman) Alain
Henriettea membranifolia	(Cogn.) Alain		Henriettea membranifolia (Cogn.) Alain
Henriettea mucronata	(Gleason) S.S. Renner		Henriettea mucronata (Gleason) S.S. Renner
Henriettea multiflora	Naudin		Henriettea multiflora Naudin
Henriettea multigemma	Carmenate & Michelang.		Henriettea multigemma Carmenate & Michelang.
Henriettea odorata	(Markgr.) Penneys, Michelang., Judd & Almeda		Henriettea odorata (Markgr.) Penneys, Michelang., Judd & Almeda
Henriettea ovata	(Cogn.) Penneys, Michelang., Judd & Almeda		Henriettea ovata (Cogn.) Penneys, Michelang., Judd & Almeda
Henriettea patrisiana	DC.		Henriettea patrisiana DC.
Henriettea prancei	(Wurdack) Penneys, Michelang., Judd & Almeda		Henriettea prancei (Wurdack) Penneys, Michelang., Judd & Almeda
Henriettea punctata	M. Gomez		Henriettea punctata M. Gomez
Henriettea ramiflora	(Sw.) DC.		Henriettea ramiflora (Sw.) DC.
Henriettea reflexa	(Urb. & Ekman) Alain		Henriettea reflexa (Urb. & Ekman) Alain
Henriettea rimosa	(Wurdack) Penneys, Michelang., Judd & Almeda		Henriettea rimosa (Wurdack) Penneys, Michelang., Judd & Almeda
Henriettea saldanhaei	Cogn.		Henriettea saldanhaei Cogn.
Henriettea seemannii	(Naudin) L.O. Williams		Henriettea seemannii (Naudin) L.O. Williams
Henriettea sessilifolia	(L.) Alain		Henriettea sessilifolia (L.) Alain
Henriettea sierrae	Carmenate & Bécquer		Henriettea sierrae Carmenate & Bécquer
Henriettea spruceana	Cogn.		Henriettea spruceana Cogn.
Henriettea squamata	(Alain) Alain		Henriettea squamata (Alain) Alain
Henriettea squamulosa	(Cogn.) Judd		Henriettea squamulosa (Cogn.) Judd
Henriettea stellaris	O. Berg ex Triana		Henriettea stellaris O. Berg ex Triana
Henriettea steyermarkii	(Wurdack) Penneys, Michelang., Judd & Almeda		Henriettea steyermarkii (Wurdack) Penneys, Michelang., Judd & Almeda
Henriettea strigosa	Gleason		Henriettea strigosa Gleason
Henriettea succosa	(Aubl.) DC.		Henriettea succosa (Aubl.) DC.
Henriettea sylvestris	(Gleason) J.F. Macbr.		Henriettea sylvestris (Gleason) J.F. Macbr.
Henriettea tachirensis	(Wurdack) Penneys, Michelang., Judd & Almeda		Henriettea tachirensis (Wurdack) Penneys, Michelang., Judd & Almeda
Henriettea tobagensis	(Wurdack) Penneys, Michelang., Judd & Almeda		Henriettea tobagensis (Wurdack) Penneys, Michelang., Judd & Almeda
Henriettea tovarensis	(Cogn.) Penneys, Michelang., Judd & Almeda		Henriettea tovarensis (Cogn.) Penneys, Michelang., Judd & Almeda
Henriettea trachyphylla	(Triana) Penneys, Michelang., Judd & Almeda		Henriettea trachyphylla (Triana) Penneys, Michelang., Judd & Almeda
Henriettea triflora	(Vahl) Alain		Henriettea triflora (Vahl) Alain
Henriettea tuberculosa	(Donn. Sm.) L.O. Williams		Henriettea tuberculosa (Donn. Sm.) L.O. Williams
Henriettea uniflora	Judd, Skean & Penneys		Henriettea uniflora Judd, Skean & Penneys
Henriettea verrucosa	(Triana) J.F. Macbr.		Henriettea verrucosa (Triana) J.F. Macbr.
Henriettea williamii	Brade		Henriettea williamii Brade
Henriettea williamsii	(Pittier) Penneys, Michelangeli, Judd & Almeda		Henriettea williamsii (Pittier) Penneys, Michelangeli, Judd & Almeda
Heterocentron alatum	Rose & Standl.		Heterocentron alatum Rose & Standl.
Heterocentron breedlovei	(Wurdack) P.J.F. Guim. & Michelang.		Heterocentron breedlovei (Wurdack) P.J.F. Guim. & Michelang.
Heterocentron chiapense	(Wurdack) P.J.F. Guim. & Michelang.		Heterocentron chiapense (Wurdack) P.J.F. Guim. & Michelang.
Heterocentron chimalapanum	Todzia		Heterocentron chimalapanum Todzia
Heterocentron elegans	(Schltdl.) Kuntze		Heterocentron elegans (Schltdl.) Kuntze
Heterocentron evansii	Almeda		Heterocentron evansii Almeda
Heterocentron glandulosum	Schenk		Heterocentron glandulosum Schenk
Heterocentron hirtellum	(Cogn.) L.O. Williams		Heterocentron hirtellum (Cogn.) L.O. Williams
Heterocentron laxiflorum	Standl.		Heterocentron laxiflorum Standl.
Heterocentron mexicanum	Hook. & Arn.		Heterocentron mexicanum Hook. & Arn.
Heterocentron muricatum	Gleason		Heterocentron muricatum Gleason
Heterocentron purpureum	S. Winkl.		Heterocentron purpureum S. Winkl.
Heterocentron subtriplinervium	(Link & Otto) A. Braun & C.D. Bouché		Heterocentron subtriplinervium (Link & Otto) A. Braun & C.D. Bouché
Heterocentron suffruticosum	Brandegee		Heterocentron suffruticosum Brandegee
Huberia bradeana	Bochorny & R.Goldenb.		Huberia bradeana Bochorny & R.Goldenb.
Huberia capixaba	(R.Goldenb. & Reginato) Bochorny & Michelang.		Huberia capixaba (R.Goldenb. & Reginato) Bochorny & Michelang.
Huberia capixaba	(R.Goldenb. & Reginato) Bochorny & Michelang.		Huberia capixaba (R.Goldenb. & Reginato) Bochorny & Michelang.
Huberia carvalhoi	Baumgratz		Huberia carvalhoi Baumgratz
Huberia cogniauxii	Baumgratz		Huberia cogniauxii Baumgratz
Huberia consimilis	Baumgratz		Huberia consimilis Baumgratz
Huberia cordifolia	(Cogn.) Bochorny & R.Goldenb.		Huberia cordifolia (Cogn.) Bochorny & R.Goldenb.
Huberia corymbosa	(Cogn.) Bochorny & R.Goldenb.		Huberia corymbosa (Cogn.) Bochorny & R.Goldenb.
Huberia edmundoi	(Brade) Bochorny & R.Goldenb.		Huberia edmundoi (Brade) Bochorny & R.Goldenb.
Huberia espiritosantensis	Baumgratz		Huberia espiritosantensis Baumgratz
Huberia glazioviana	Cogn.		Huberia glazioviana Cogn.
Huberia glutinosa	(Cogn.) Bochorny & R.Goldenb.		Huberia glutinosa (Cogn.) Bochorny & R.Goldenb.
Huberia hirsuta	Bochorny & R.Goldenb.		Huberia hirsuta Bochorny & R.Goldenb.
Huberia huberioides	(Brade) Bochorny & R.Goldenb.		Huberia huberioides (Brade) Bochorny & R.Goldenb.
Huberia insignis	(Cham.) Bochorny & R.Goldenb.		Huberia insignis (Cham.) Bochorny & R.Goldenb.
Huberia kollmannii	(R.Goldenb. & R.Tav.) Bochorny & Michelang.		Huberia kollmannii (R.Goldenb. & R.Tav.) Bochorny & Michelang.
Huberia laurina	DC.		Huberia laurina DC.
Huberia limae	(Brade) Bochorny & R. Goldenb.		Huberia limae (Brade) Bochorny & R. Goldenb.
Huberia lumiarensis	(Bochorny, Michelang. & R.Goldenb.) Bochorny		Huberia lumiarensis (Bochorny, Michelang. & R.Goldenb.) Bochorny
Huberia magdalenensis	(Brade) Bochorny & R.Goldenb.		Huberia magdalenensis (Brade) Bochorny & R.Goldenb.
Huberia mestrealvarensis	(D.T.Iglesias & R.Goldenb.) Bochorny & Michelang.		Huberia mestrealvarensis (D.T.Iglesias & R.Goldenb.) Bochorny & Michelang.
Huberia minor	Cogn.		Huberia minor Cogn.
Huberia minutifolia	Bochorny & R.Goldenb.		Huberia minutifolia Bochorny & R.Goldenb.
Huberia misteriosa	Bochorny &. R. Goldenb.		Huberia misteriosa Bochorny &. R. Goldenb.
Huberia mourae	(Cogn.) Bochorny & R. Goldenb.		Huberia mourae (Cogn.) Bochorny & R. Goldenb.
Huberia nettoana	Brade		Huberia nettoana Brade
Huberia organensis	(Saldanha & Cogn.) Bochorny & R.Goldenb.		Huberia organensis (Saldanha & Cogn.) Bochorny & R.Goldenb.
Huberia ovalifolia	DC.		Huberia ovalifolia DC.
Huberia parvifolia	Cogn.		Huberia parvifolia Cogn.
Huberia peruviana	Cogn.		Huberia peruviana Cogn.
Huberia piranii	Baumgratz		Huberia piranii Baumgratz
Huberia semiserrata	DC.		Huberia semiserrata DC.
Huberia sessilifolia	R. Goldenb. & Michelang.		Huberia sessilifolia R. Goldenb. & Michelang.
Huberia souzalimae	(Brade) Bochorny & R.Goldenb.		Huberia souzalimae (Brade) Bochorny & R.Goldenb.
Huberia staminodia	Baumgratz		Huberia staminodia Baumgratz
Huberia triplinervis	Cogn.		Huberia triplinervis Cogn.
Huberia weberbaueriana	Baumgratz		Huberia weberbaueriana Baumgratz
Kirkbridea pentamera	Wurdack		Kirkbridea pentamera Wurdack
Kirkbridea tetramera	Wurdack		Kirkbridea tetramera Wurdack
Lavoisiera adamantium	Pedersoli		Lavoisiera adamantium Pedersoli
Lavoisiera alba	DC.		Lavoisiera alba DC.
Lavoisiera angustifolia	Cogn.		Lavoisiera angustifolia Cogn.
Lavoisiera arachnoidea	Almeda & A.B. Martins		Lavoisiera arachnoidea Almeda & A.B. Martins
Lavoisiera belinelloi	A.B. Martins & Almeda		Lavoisiera belinelloi A.B. Martins & Almeda
Lavoisiera bradeana	Barreto		Lavoisiera bradeana Barreto
Lavoisiera canastrensis	Almeda & A.B. Martins		Lavoisiera canastrensis Almeda & A.B. Martins
Lavoisiera caryophyllea	Naudin		Lavoisiera caryophyllea Naudin
Lavoisiera chamaepitys	Naudin		Lavoisiera chamaepitys Naudin
Lavoisiera cougniaxiana	Barreto		Lavoisiera cougniaxiana Barreto
Lavoisiera confertiflora	Naudin		Lavoisiera confertiflora Naudin
Lavoisiera cordata	Cogn. ex Glaz.		Lavoisiera cordata Cogn. ex Glaz.
Lavoisiera crassifolia	DC.		Lavoisiera crassifolia DC.
Lavoisiera daviesiana	Almeda & A.B. Martins		Lavoisiera daviesiana Almeda & A.B. Martins
Lavoisiera firmula	DC.		Lavoisiera firmula DC.
Lavoisiera gentianoides	DC.		Lavoisiera gentianoides DC.
Lavoisiera glandulifera	Naudin		Lavoisiera glandulifera Naudin
Lavoisiera grandiflora	Naudin		Lavoisiera grandiflora Naudin
Lavoisiera harleyi	Wurdack		Lavoisiera harleyi Wurdack
Lavoisiera humilis	Naudin		Lavoisiera humilis Naudin
Lavoisiera imbricata	DC.		Lavoisiera imbricata DC.
Lavoisiera itambana	DC.		Lavoisiera itambana DC.
Lavoisiera macrocarpa	Naudin		Lavoisiera macrocarpa Naudin
Lavoisiera mello-barretoi	Markgr.		Lavoisiera mello-barretoi Markgr.
Lavoisiera minima	A.B. Martins & Almeda		Lavoisiera minima A.B. Martins & Almeda
Lavoisiera mucorifera	DC.		Lavoisiera mucorifera DC.
Lavoisiera nervulosa	Naudin		Lavoisiera nervulosa Naudin
Lavoisiera pohliana	O. Berg ex Arens		Lavoisiera pohliana O. Berg ex Arens
Lavoisiera pulchella	Cham.		Lavoisiera pulchella Cham.
Lavoisiera pulcherrima	DC.		Lavoisiera pulcherrima DC.
Lavoisiera punctata	DC.		Lavoisiera punctata DC.
Lavoisiera quinquenervis	Wurdack		Lavoisiera quinquenervis Wurdack
Lavoisiera rigida	Cogn.		Lavoisiera rigida Cogn.
Lavoisiera rundeliana	Almeda & A.B. Martins		Lavoisiera rundeliana Almeda & A.B. Martins
Lavoisiera sampaioana	Barreto		Lavoisiera sampaioana Barreto
Lavoisiera scaberula	Naudin		Lavoisiera scaberula Naudin
Lavoisiera senaei	Schwacke		Lavoisiera senaei Schwacke
Lavoisiera setosa	A.B. Martins & Almeda		Lavoisiera setosa A.B. Martins & Almeda
Lavoisiera subulata	Triana		Lavoisiera subulata Triana
Lavoisiera tetragona	DC.		Lavoisiera tetragona DC.
Lavoisiera vestita	Almeda & A.B. Martins		Lavoisiera vestita Almeda & A.B. Martins
Leiostegia vernicosa	Benth.		Leiostegia vernicosa Benth.
Lithobium cordatum	Bong.		Lithobium cordatum Bong.
Loricalepis atlantica	Amorim, Michelang. & R.Goldenb.		Loricalepis atlantica Amorim, Michelang. & R.Goldenb.
Loricalepis duckei	Brade		Loricalepis duckei Brade
Macairea axilliflora	Wurdack		Macairea axilliflora Wurdack
Macairea cardonae	Wurdack		Macairea cardonae Wurdack
Macairea chimantensis	Wurdack		Macairea chimantensis Wurdack
Macairea cuieirasii	S.S. Renner		Macairea cuieirasii S.S. Renner
Macairea duidae	Gleason		Macairea duidae Gleason
Macairea lanata	Gleason		Macairea lanata Gleason
Macairea lasiophylla	(Benth.) Wurdack		Macairea lasiophylla (Benth.) Wurdack
Macairea linearis	Gleason		Macairea linearis Gleason
Macairea maroana	Wurdack		Macairea maroana Wurdack
Macairea multinervia	Benth.		Macairea multinervia Benth.
Macairea neblinae	Wurdack		Macairea neblinae Wurdack
Macairea pachyphylla	Benth.		Macairea pachyphylla Benth.
Macairea parvifolia	Benth.		Macairea parvifolia Benth.
Macairea philipsonii	Renner		Macairea philipsonii Renner
Macairea radula	(Bonpl.) DC.		Macairea radula (Bonpl.) DC.
Macairea rigida	Benth.		Macairea rigida Benth.
Macairea rufescens	DC.		Macairea rufescens DC.
Macairea spruceana	O. Berg ex Triana		Macairea spruceana O. Berg ex Triana
Macairea stylosa	Triana		Macairea stylosa Triana
Macairea sulcata	Triana		Macairea sulcata Triana
Macairea theresiae	Cogn.		Macairea theresiae Cogn.
Macairea thyrsiflora	DC.		Macairea thyrsiflora DC.
Macrocentrum andinum	Michelang. & R. Goldenb.		Macrocentrum andinum Michelang. & R. Goldenb.
Macrocentrum anfractum	Wurdack		Macrocentrum anfractum Wurdack
Macrocentrum angustifolium	Gleason		Macrocentrum angustifolium Gleason
Macrocentrum anychioides	Gleason		Macrocentrum anychioides Gleason
Macrocentrum brevipedicellatum	Wurdack		Macrocentrum brevipedicellatum Wurdack
Macrocentrum chimantense	Wurdack		Macrocentrum chimantense Wurdack
Macrocentrum cristatum	(DC.) Triana		Macrocentrum cristatum (DC.) Triana
Macrocentrum droseroides	Triana		Macrocentrum droseroides Triana
Macrocentrum fasciculatum	(DC.) Triana		Macrocentrum fasciculatum (DC.) Triana
Macrocentrum fruticosum	Gleason		Macrocentrum fruticosum Gleason
Macrocentrum gesneriaceum	Sandwith		Macrocentrum gesneriaceum Sandwith
Macrocentrum gracile	Wurdack		Macrocentrum gracile Wurdack
Macrocentrum huberi	Wurdack		Macrocentrum huberi Wurdack
Macrocentrum latifolium	Wurdack		Macrocentrum latifolium Wurdack
Macrocentrum longidens	(Gleason) Wurdack		Macrocentrum longidens (Gleason) Wurdack
Macrocentrum maguirei	Wurdack		Macrocentrum maguirei Wurdack
Macrocentrum minus	Gleason		Macrocentrum minus Gleason
Macrocentrum neblinae	Wurdack		Macrocentrum neblinae Wurdack
Macrocentrum parvulum	Gleason		Macrocentrum parvulum Gleason
Macrocentrum repens	(Gleason) Wurdack		Macrocentrum repens (Gleason) Wurdack
Macrocentrum rubescens	Gleason		Macrocentrum rubescens Gleason
Macrocentrum steyermarkii	Wurdack		Macrocentrum steyermarkii Wurdack
Macrocentrum stipulaceum	Wurdack		Macrocentrum stipulaceum Wurdack
Macrocentrum vestitum	Sandwith		Macrocentrum vestitum Sandwith
Macrocentrum yaracuyense	Wurdack		Macrocentrum yaracuyense Wurdack
Maguireanthus ayangannae	Wurdack		Maguireanthus ayangannae Wurdack
Mallophyton chimantense	Wurdack		Mallophyton chimantense Wurdack
Marcetia acerosa	DC.		Marcetia acerosa DC.
Marcetia alba	Ule		Marcetia alba Ule
Marcetia bahiana	(Ule) A.B. Martins		Marcetia bahiana (Ule) A.B. Martins
Marcetia bahiensis	(Brade & Markgr.) Wurdack		Marcetia bahiensis (Brade & Markgr.) Wurdack
Marcetia bracteolaris	Cogn.		Marcetia bracteolaris Cogn.
Marcetia candolleana	A.K.A. Santos & A.B. Martins		Marcetia candolleana A.K.A. Santos & A.B. Martins
Marcetia canescens	Naudin		Marcetia canescens Naudin
Marcetia cardosoana	A.K.A. Santos & A.B. Martins		Marcetia cardosoana A.K.A. Santos & A.B. Martins
Marcetia eimeariana	A.B. Martins & Woodgyer		Marcetia eimeariana A.B. Martins & Woodgyer
Marcetia ericoides	(Spreng.) Cogn.		Marcetia ericoides (Spreng.) Cogn.
Marcetia formosa	Wurdack		Marcetia formosa Wurdack
Marcetia grandiflora	Markgr.		Marcetia grandiflora Markgr.
Marcetia harleyi	Wurdack		Marcetia harleyi Wurdack
Marcetia hatschbachii	A.B. Martins		Marcetia hatschbachii A.B. Martins
Marcetia lanuginosa	Wurdack		Marcetia lanuginosa Wurdack
Marcetia latifolia	Naudin		Marcetia latifolia Naudin
Marcetia luetzelburgii	Markgr.		Marcetia luetzelburgii Markgr.
Marcetia lychnophoroides	A.B. Martins		Marcetia lychnophoroides A.B. Martins
Marcetia macrophylla	Wurdack		Marcetia macrophylla Wurdack
Marcetia mucugensis	Wurdack		Marcetia mucugensis Wurdack
Marcetia nervulosa	Markgr.		Marcetia nervulosa Markgr.
Marcetia nummularia	Markgr.		Marcetia nummularia Markgr.
Marcetia oxycoccoides	Wurdack & A.B. Martins		Marcetia oxycoccoides Wurdack & A.B. Martins
Marcetia paganuccii	A.K.A. Santos & A.B. Martins		Marcetia paganuccii A.K.A. Santos & A.B. Martins
Marcetia semiriana	A.B. Martins		Marcetia semiriana A.B. Martins
Marcetia shepherdii	A.B. Martins		Marcetia shepherdii A.B. Martins
Marcetia sincorensis	Wurdack		Marcetia sincorensis Wurdack
Marcetia taxifolia	(A. St.-Hil.) DC.		Marcetia taxifolia (A. St.-Hil.) DC.
Marcetia velutina	Markgr.		Marcetia velutina Markgr.
Marcetia viscida	Wurdack		Marcetia viscida Wurdack
Meriania acida	(Markgr.) Wurdack		Meriania acida (Markgr.) Wurdack
Meriania acostae	Wurdack		Meriania acostae Wurdack
Meriania aguaditensis	H. Mend. & Fern. Alonso		Meriania aguaditensis H. Mend. & Fern. Alonso
Meriania albertiae	Wurdack		Meriania albertiae Wurdack
Meriania albiflora	Carmenate & Michelang.		Meriania albiflora Carmenate & Michelang.
Meriania almedae	Wurdack		Meriania almedae Wurdack
Meriania amischophylla	Wurdack		Meriania amischophylla Wurdack
Meriania ampla	Wurdack		Meriania ampla Wurdack
Meriania amplexicaulis	Wurdack		Meriania amplexicaulis Wurdack
Meriania angustifolia	(Cogn.) Carmenate & Michelang.		Meriania angustifolia (Cogn.) Carmenate & Michelang.
Meriania antioquiensis	L. Uribe		Meriania antioquiensis L. Uribe
Meriania aracaensis	Wurdack		Meriania aracaensis Wurdack
Meriania arborea	(Naudin) Triana		Meriania arborea (Naudin) Triana
Meriania ardyae	D. Fernández & Dellinger		Meriania ardyae D. Fernández & Dellinger
Meriania arizae	H. Mend. & Fern. Alonso		Meriania arizae H. Mend. & Fern. Alonso
Meriania aurata	C. Ulloa, D. Fernández & D.A. Neill		Meriania aurata C. Ulloa, D. Fernández & D.A. Neill
Meriania axinioides	Gleason		Meriania axinioides Gleason
Meriania barbosae	H. Mend., Alvear & Almeda		Meriania barbosae H. Mend., Alvear & Almeda
Meriania baumgratziana	R. Goldenb. & Michelang.		Meriania baumgratziana R. Goldenb. & Michelang.
Meriania boliviensis	Cogn.		Meriania boliviensis Cogn.
Meriania brachycera	(Naudin) H. Mend. & Fern. Alonso		Meriania brachycera (Naudin) H. Mend. & Fern. Alonso
Meriania brevipedunculata	Judd & Skean		Meriania brevipedunculata Judd & Skean
Meriania brittoniana	Wurdack		Meriania brittoniana Wurdack
Meriania broccha	Wurdack		Meriania broccha Wurdack
Meriania calophylla	(Cham.) Triana		Meriania calophylla (Cham.) Triana
Meriania calyptrata	(Naudin) Triana		Meriania calyptrata (Naudin) Triana
Meriania campii	Wurdack		Meriania campii Wurdack
Meriania claussenii	(Naudin) Triana		Meriania claussenii (Naudin) Triana
Meriania colombiana	Gleason		Meriania colombiana Gleason
Meriania compressicaulis	Almeda & Penneys		Meriania compressicaulis Almeda & Penneys
Meriania cordifolia	(H. Karst.) Triana		Meriania cordifolia (H. Karst.) Triana
Meriania costata	Wurdack		Meriania costata Wurdack
Meriania crassiramis	(Naudin) Wurdack		Meriania crassiramis (Naudin) Wurdack
Meriania cuneifolia	Gleason		Meriania cuneifolia Gleason
Meriania cuzcoana	Wurdack		Meriania cuzcoana Wurdack
Meriania denticulata	(Gleason) Wurdack		Meriania denticulata (Gleason) Wurdack
Meriania dimorphanthera	Wurdack		Meriania dimorphanthera Wurdack
Meriania drakei	(Cogn.) Wurdack		Meriania drakei (Cogn.) Wurdack
Meriania ekmanii	Urb.		Meriania ekmanii Urb.
Meriania excelsa	(Gardner) Cogn.		Meriania excelsa (Gardner) Cogn.
Meriania fantastica	Alvear, H. Mend. & Almeda		Meriania fantastica Alvear, H. Mend. & Almeda
Meriania finicola	Wurdack		Meriania finicola Wurdack
Meriania franciscana	C. Ulloa & Homeier		Meriania franciscana C. Ulloa & Homeier
Meriania furvanthera	Wurdack		Meriania furvanthera Wurdack
Meriania glabra	(DC.) Triana		Meriania glabra (DC.) Triana
Meriania glazioviana	Cogn.		Meriania glazioviana Cogn.
Meriania grandiflora	(Standl.) Almeda		Meriania grandiflora (Standl.) Almeda
Meriania haemantha	(Planch. & Lindl.) H. Mend. & Fern. Alonso		Meriania haemantha (Planch. & Lindl.) H. Mend. & Fern. Alonso
Meriania heptamera	Lozano & Alvear		Meriania heptamera Lozano & Alvear
Meriania hernandi	L. Uribe		Meriania hernandi L. Uribe
Meriania hexamera	Sprague		Meriania hexamera Sprague
Meriania horrida	C. Ulloa & Achá		Meriania horrida C. Ulloa & Achá
Meriania hoyosii	(Wurdack) Almeda & Penneys		Meriania hoyosii (Wurdack) Almeda & Penneys
Meriania huilensis	Wurdack		Meriania huilensis Wurdack
Meriania inflata	Michelang. & R. Goldenb.		Meriania inflata Michelang. & R. Goldenb.
Meriania involucrata	(Desr.) Naudin		Meriania involucrata (Desr.) Naudin
Meriania kirkbridei	Wurdack		Meriania kirkbridei Wurdack
Meriania leucantha	(Sw.) Sw.		Meriania leucantha (Sw.) Sw.
Meriania longipes	O. Berg ex Triana		Meriania longipes O. Berg ex Triana
Meriania loxensis	Gleason		Meriania loxensis Gleason
Meriania macrophylla	(Benth.) Triana		Meriania macrophylla (Benth.) Triana
Meriania maguirei	Wurdack		Meriania maguirei Wurdack
Meriania maxima	Markgr.		Meriania maxima Markgr.
Meriania mexiae	Wurdack		Meriania mexiae Wurdack
Meriania microflora	Rob.Fernandez, R.Goldenb. & Michelang.		Meriania microflora Rob.Fernandez, R.Goldenb. & Michelang.
Meriania mutabilis	(Gleason) H. Mend. & Fern. Alonso		Meriania mutabilis (Gleason) H. Mend. & Fern. Alonso
Meriania mutisii	(Bonpl.) H. Mend. & Fern. Alonso		Meriania mutisii (Bonpl.) H. Mend. & Fern. Alonso
Meriania neblinensis	Wurdack		Meriania neblinensis Wurdack
Meriania ninakurorum	(Bussmann & Paniagua) E. Cotton & Balslev		Meriania ninakurorum (Bussmann & Paniagua) E. Cotton & Balslev
Meriania nobilis	Triana		Meriania nobilis Triana
Meriania odorata	Almeda		Meriania odorata Almeda
Meriania ornata	Wurdack		Meriania ornata Wurdack
Meriania pallida	Gleason		Meriania pallida Gleason
Meriania panamensis	Gleason		Meriania panamensis Gleason
Meriania paniculata	(DC.) Triana		Meriania paniculata (DC.) Triana
Meriania parvifolia	Judd & Skean		Meriania parvifolia Judd & Skean
Meriania pastazana	Wurdack		Meriania pastazana Wurdack
Meriania peltata	L. Uribe		Meriania peltata L. Uribe
Meriania phlomoides	(Triana) Almeda		Meriania phlomoides (Triana) Almeda
Meriania pichinchensis	Wurdack		Meriania pichinchensis Wurdack
Meriania prunifolia	D. Don		Meriania prunifolia D. Don
Meriania pulcherrima	Herzog		Meriania pulcherrima Herzog
Meriania purpurea	(Sw.) Sw.		Meriania purpurea (Sw.) Sw.
Meriania quintuplinervis	Naudin		Meriania quintuplinervis Naudin
Meriania radula	(Benth.) Triana		Meriania radula (Benth.) Triana
Meriania rigida	(Benth.) Triana		Meriania rigida (Benth.) Triana
Meriania robusta	Cogn.		Meriania robusta Cogn.
Meriania rubriflora	Michelang. & R. Goldenb.		Meriania rubriflora Michelang. & R. Goldenb.
Meriania rugosa	Markgr.		Meriania rugosa Markgr.
Meriania sanchezii	R. Goldenb.		Meriania sanchezii R. Goldenb.
Meriania sanguinea	Wurdack		Meriania sanguinea Wurdack
Meriania sararensis	H. Mend. & Fern. Alonso		Meriania sararensis H. Mend. & Fern. Alonso
Meriania sclerophylla	Triana		Meriania sclerophylla Triana
Meriania selvaflorensis	H. Mend.		Meriania selvaflorensis H. Mend.
Meriania silverstonei	H. Mend. & Fern. Alonso		Meriania silverstonei H. Mend. & Fern. Alonso
Meriania speciosa	(Bonpl.) Naudin		Meriania speciosa (Bonpl.) Naudin
Meriania splendens	Triana		Meriania splendens Triana
Meriania squamulosa	Urb. & Ekman		Meriania squamulosa Urb. & Ekman
Meriania stellata	(Gleason) Wurdack		Meriania stellata (Gleason) Wurdack
Meriania steyermarkii	Gleason		Meriania steyermarkii Gleason
Meriania subumbellata	Cogn.		Meriania subumbellata Cogn.
Meriania tetragona	(Cogn.) Wurdack		Meriania tetragona (Cogn.) Wurdack
Meriania tetramera	Wurdack		Meriania tetramera Wurdack
Meriania tetraquetra	Triana		Meriania tetraquetra Triana
Meriania tomentosa	(Cogn.) Wurdack		Meriania tomentosa (Cogn.) Wurdack
Meriania urceolata	Triana		Meriania urceolata Triana
Meriania vargasii	Wurdack		Meriania vargasii Wurdack
Meriania versicolor	L. Uribe		Meriania versicolor L. Uribe
Meriania vilcabambensis	Wurdack		Meriania vilcabambensis Wurdack
Meriania weberbaueri	J.F. Macbr.		Meriania weberbaueri J.F. Macbr.
Meriania yalconensis	H. Mend. & Fern. Alonso		Meriania yalconensis H. Mend. & Fern. Alonso
Meriania zunacensis	D. Fernández & Dellinger		Meriania zunacensis D. Fernández & Dellinger
Merianthera bullata	R. Goldenb., Fraga & A.P. Fontana		Merianthera bullata R. Goldenb., Fraga & A.P. Fontana
Merianthera burlemarxii	Wurdack		Merianthera burlemarxii Wurdack
Merianthera eburnea	R. Goldenb. & Fraga		Merianthera eburnea R. Goldenb. & Fraga
Merianthera parvifolia	R. Goldenb., Fraga & A.P. Fontana		Merianthera parvifolia R. Goldenb., Fraga & A.P. Fontana
Merianthera pulchra	Kuhlm.		Merianthera pulchra Kuhlm.
Merianthera sipolisii	(Glaz. & Cogn.) Wurdack		Merianthera sipolisii (Glaz. & Cogn.) Wurdack
Merianthera verrucosa	R. Goldenb., Fraga & A.P. Fontana		Merianthera verrucosa R. Goldenb., Fraga & A.P. Fontana
Miconia abbottii	(Urb.) Ionta & Judd		Miconia abbottii (Urb.) Ionta & Judd
Miconia abbreviata	Markgr.		Miconia abbreviata Markgr.
Miconia abeggii	Urb. & Ekman		Miconia abeggii Urb. & Ekman
Miconia ablusa	(Wurdack) Michelang.		Miconia ablusa (Wurdack) Michelang.
Miconia abscondita	Majure, Judd & Skean		Miconia abscondita Majure, Judd & Skean
Miconia abysmophila	Wurdack		Miconia abysmophila Wurdack
Miconia acalephoides	Naudin		Miconia acalephoides Naudin
Miconia acanthocoryne	Wurdack		Miconia acanthocoryne Wurdack
Miconia acinodendron	(L.) Sweet		Miconia acinodendron (L.) Sweet
Miconia acostae	(Wurdack) Michelang.		Miconia acostae (Wurdack) Michelang.
Miconia acreana	Ule		Miconia acreana Ule
Miconia acuminata	(Steud.) Naudin		Miconia acuminata (Steud.) Naudin
Miconia acuminifera	Triana		Miconia acuminifera Triana
Miconia acuminoides	Skean, Judd & Majure		Miconia acuminoides Skean, Judd & Majure
Miconia acunae	Borhidi		Miconia acunae Borhidi
Miconia acunagalei	Judd, Bécquer & Majure		Miconia acunagalei Judd, Bécquer & Majure
Miconia acurensis	(Wurdack) Michelang.		Miconia acurensis (Wurdack) Michelang.
Miconia acutiflora	(Naudin) R. Goldenb.		Miconia acutiflora (Naudin) R. Goldenb.
Miconia acutifolia	Ule		Miconia acutifolia Ule
Miconia acutilamina	Michelang.		Miconia acutilamina Michelang.
Miconia acutipetala	Sprague		Miconia acutipetala Sprague
Miconia adamantinensis	(Brade) R. Goldenb.		Miconia adamantinensis (Brade) R. Goldenb.
Miconia adenocalyx	Urb. & Ekman		Miconia adenocalyx Urb. & Ekman
Miconia adenothrix	(Cogn.) R. Goldenb.		Miconia adenothrix (Cogn.) R. Goldenb.
Miconia adinantha	Wurdack		Miconia adinantha Wurdack
Miconia adrieni	J.F. Macbr.		Miconia adrieni J.F. Macbr.
Miconia adventitia	Michelang.		Miconia adventitia Michelang.
Miconia aenigmatica	Wurdack		Miconia aenigmatica Wurdack
Miconia aequatorialis	Wurdack		Miconia aequatorialis Wurdack
Miconia aeruginosa	Naudin		Miconia aeruginosa Naudin
Miconia affinis	DC.		Miconia affinis DC.
Miconia aggregata	Gleason		Miconia aggregata Gleason
Miconia agrestis	(Aubl.) Baill.		Miconia agrestis (Aubl.) Baill.
Miconia aguaclarensis	(Wurdack) Michelang.		Miconia aguaclarensis (Wurdack) Michelang.
Miconia aguilarii	(Kriebel & Almeda) Gamba & Almeda		Miconia aguilarii (Kriebel & Almeda) Gamba & Almeda
Miconia aguirrei	L. Uribe		Miconia aguirrei L. Uribe
Miconia aguitensis	Gleason		Miconia aguitensis Gleason
Miconia alainii	Judd & Skean		Miconia alainii Judd & Skean
Miconia alata	(Aubl.) DC.		Miconia alata (Aubl.) DC.
Miconia alaticaulis	Michelang.		Miconia alaticaulis Michelang.
Miconia alatiflora	Michelang.		Miconia alatiflora Michelang.
Miconia alatissima	Gamba & Almeda		Miconia alatissima Gamba & Almeda
Miconia albertii	Gleason		Miconia albertii Gleason
Miconia albertobrenesii	Gamba & Almeda		Miconia albertobrenesii Gamba & Almeda
Miconia albertsmithii	Michelang.		Miconia albertsmithii Michelang.
Miconia albicans	(Sw.) Steud.		Miconia albicans (Sw.) Steud.
Miconia albiviridis	Urb. & Ekman		Miconia albiviridis Urb. & Ekman
Miconia alboglandulosa	Gamba & Almeda		Miconia alboglandulosa Gamba & Almeda
Miconia alborosea	L. Uribe		Miconia alborosea L. Uribe
Miconia alborufescens	Naudin		Miconia alborufescens Naudin
Miconia aligera	Wurdack		Miconia aligera Wurdack
Miconia aliquantula	Wurdack		Miconia aliquantula Wurdack
Miconia allardii	(Wurdack) Michelang.		Miconia allardii (Wurdack) Michelang.
Miconia allenii	(Almeda) Almeda		Miconia allenii (Almeda) Almeda
Miconia alloeotricha	(Urb.) Judd, Penneys & Skean		Miconia alloeotricha (Urb.) Judd, Penneys & Skean
Miconia almedae	(Kriebel) Michelang.		Miconia almedae (Kriebel) Michelang.
Miconia alpestris	Cogn.		Miconia alpestris Cogn.
Miconia alpina	Cogn.		Miconia alpina Cogn.
Miconia alternans	Naudin		Miconia alternans Naudin
Miconia alternidomatia	Michelang.		Miconia alternidomatia Michelang.
Miconia alternifolia	(Griseb.) Alain		Miconia alternifolia (Griseb.) Alain
Miconia alternilamina	Michelang.		Miconia alternilamina Michelang.
Miconia alterninervia	(Cogn.) R. Goldenb.		Miconia alterninervia (Cogn.) R. Goldenb.
Miconia altissima	Cogn.		Miconia altissima Cogn.
Miconia altomacaensis	(Baumgratz & D'El Rei Souza) R. Goldenb.		Miconia altomacaensis (Baumgratz & D'El Rei Souza) R. Goldenb.
Miconia alypifolia	Naudin		Miconia alypifolia Naudin
Miconia amabilis	Cogn.		Miconia amabilis Cogn.
Miconia amacurensis	Wurdack		Miconia amacurensis Wurdack
Miconia amambayensis	Kraenzl.		Miconia amambayensis Kraenzl.
Miconia amapaensis	R. Goldenb. & Hinoshita		Miconia amapaensis R. Goldenb. & Hinoshita
Miconia amazonica	Triana		Miconia amazonica Triana
Miconia amblyandra	Naudin		Miconia amblyandra Naudin
Miconia amilcariana	Almeda & Dorr		Miconia amilcariana Almeda & Dorr
Miconia amissa	Wurdack		Miconia amissa Wurdack
Miconia amnicola	Wurdack		Miconia amnicola Wurdack
Miconia amoena	Triana		Miconia amoena Triana
Miconia amorimii	(Reginato & R. Goldenb.) R. Goldenb.		Miconia amorimii (Reginato & R. Goldenb.) R. Goldenb.
Miconia ampla	Triana		Miconia ampla Triana
Miconia amplexicaulis	Naudin		Miconia amplexicaulis Naudin
Miconia amplilamina	Michelang.		Miconia amplilamina Michelang.
Miconia amplinodis	Umaña & Almeda		Miconia amplinodis Umaña & Almeda
Miconia amygdaloides	(DC.) R. Goldenb.		Miconia amygdaloides (DC.) R. Goldenb.
Miconia anaectocalyx	Michelang.		Miconia anaectocalyx Michelang.
Miconia anchicayensis	Gamba & Almeda		Miconia anchicayensis Gamba & Almeda
Miconia ancistrophora	(C. Wright) Triana		Miconia ancistrophora (C. Wright) Triana
Miconia andersonii	Fawc. & Rendle		Miconia andersonii Fawc. & Rendle
Miconia andreana	Cogn.		Miconia andreana Cogn.
Miconia androsaemifolia	Griseb.		Miconia androsaemifolia Griseb.
Miconia angelana	R. Romero & R. Goldenb.		Miconia angelana R. Romero & R. Goldenb.
Miconia angulata	(Griseb.) M. Gomez		Miconia angulata (Griseb.) M. Gomez
Miconia angustidentata	Almeda & Penneys		Miconia angustidentata Almeda & Penneys
Miconia angustifolia	(Sw.) Griseb.		Miconia angustifolia (Sw.) Griseb.
Miconia angustilamina	(Judd & Skean) Judd & Ionta		Miconia angustilamina (Judd & Skean) Judd & Ionta
Miconia anisophylla	Triana		Miconia anisophylla Triana
Miconia anisotricha	(Schltdl.) Triana		Miconia anisotricha (Schltdl.) Triana
Miconia annulata	(Naudin) Triana		Miconia annulata (Naudin) Triana
Miconia anoriensis	(L. Uribe) Michelang.		Miconia anoriensis (L. Uribe) Michelang.
Miconia antillana	Skean, Judd & Majure		Miconia antillana Skean, Judd & Majure
Miconia antioquiensis	Wurdack		Miconia antioquiensis Wurdack
Miconia aphanantha	(Naudin) Michelang.		Miconia aphanantha (Naudin) Michelang.
Miconia apiculata	Urb. & Ekman		Miconia apiculata Urb. & Ekman
Miconia apleura	(Urb. & Ekman) Judd & Bécquer		Miconia apleura (Urb. & Ekman) Judd & Bécquer
Miconia aplostachya	(Bonpl.) DC.		Miconia aplostachya (Bonpl.) DC.
Miconia aponeura	Triana		Miconia aponeura Triana
Miconia appendiculata	Triana		Miconia appendiculata Triana
Miconia approximata	Gamba & Almeda		Miconia approximata Gamba & Almeda
Miconia aprica	Gleason		Miconia aprica Gleason
Miconia aptera	(DC.) R. Goldenb.		Miconia aptera (DC.) R. Goldenb.
Miconia araguensis	Wurdack		Miconia araguensis Wurdack
Miconia araneifera	(Markgr.) Michelang. & R. Goldenb.		Miconia araneifera (Markgr.) Michelang. & R. Goldenb.
Miconia arboricola	Almeda		Miconia arboricola Almeda
Miconia arbutifolia	Naudin		Miconia arbutifolia Naudin
Miconia archeri	Wurdack		Miconia archeri Wurdack
Miconia argentea	(Sw.) DC.		Miconia argentea (Sw.) DC.
Miconia argentimuricata	Majure & Judd		Miconia argentimuricata Majure & Judd
Miconia argyraea	Cogn.		Miconia argyraea Cogn.
Miconia argyrophylla	DC.		Miconia argyrophylla DC.
Miconia aristata	Gleason		Miconia aristata Gleason
Miconia aristigera	(Naudin) R. Goldenb. & Michelang.		Miconia aristigera (Naudin) R. Goldenb. & Michelang.
Miconia ascendens	Wurdack		Miconia ascendens Wurdack
Miconia ascenditricha	Judd, Bécquer & Majure		Miconia ascenditricha Judd, Bécquer & Majure
Miconia asclepiadea	Triana		Miconia asclepiadea Triana
Miconia aspera	(Cogn.) R. Goldenb.		Miconia aspera (Cogn.) R. Goldenb.
Miconia aspergillaris	(Bonpl.) Naudin		Miconia aspergillaris (Bonpl.) Naudin
Miconia asperifolia	(Naudin) Majure & Judd		Miconia asperifolia (Naudin) Majure & Judd
Miconia asperiuscula	(DC.) R. Goldenb.		Miconia asperiuscula (DC.) R. Goldenb.
Miconia asperrima	Triana		Miconia asperrima Triana
Miconia asplundii	Wurdack		Miconia asplundii Wurdack
Miconia aspratilis	Wurdack		Miconia aspratilis Wurdack
Miconia astrocalyx	Meirelles & R. Goldenb.		Miconia astrocalyx Meirelles & R. Goldenb.
Miconia astroplocama	Donn. Sm.		Miconia astroplocama Donn. Sm.
Miconia astrotricha	(DC.) Triana		Miconia astrotricha (DC.) Triana
Miconia asymmetrica	Michelang.		Miconia asymmetrica Michelang.
Miconia atlantica	Caddah & R. Goldenb.		Miconia atlantica Caddah & R. Goldenb.
Miconia atrata	(Spreng.) Wawra		Miconia atrata (Spreng.) Wawra
Miconia atrofusca	Cogn.		Miconia atrofusca Cogn.
Miconia atropilis	Cogn. & Gleason		Miconia atropilis Cogn. & Gleason
Miconia atropurpurea	Gamba & Almeda		Miconia atropurpurea Gamba & Almeda
Miconia atroviridis	(Cogn.) R. Goldenb.		Miconia atroviridis (Cogn.) R. Goldenb.
Miconia attenuatifolia	Michelang.		Miconia attenuatifolia Michelang.
Miconia augustgrisebachii	Ionta & Judd		Miconia augustgrisebachii Ionta & Judd
Miconia augusti	Cogn.		Miconia augusti Cogn.
Miconia augustkappleri	Michelang.		Miconia augustkappleri Michelang.
Miconia aulocalyx	Mart. ex Triana		Miconia aulocalyx Mart. ex Triana
Miconia aurantiaca	(Almeda & Kriebel) Gamba & Almeda		Miconia aurantiaca (Almeda & Kriebel) Gamba & Almeda
Miconia aurantipetala	Michelang.		Miconia aurantipetala Michelang.
Miconia aurea	(D. Don) Naudin		Miconia aurea (D. Don) Naudin
Miconia aureoides	Cogn.		Miconia aureoides Cogn.
Miconia auricoma	(Spring ex Mart.) R. Goldenb.		Miconia auricoma (Spring ex Mart.) R. Goldenb.
Miconia aurifolia	Bécquer & Judd		Miconia aurifolia Bécquer & Judd
Miconia auritinoda	Wurdack		Miconia auritinoda Wurdack
Miconia australis	(Cham.) R. Goldenb.		Miconia australis (Cham.) R. Goldenb.
Miconia avia	Wurdack		Miconia avia Wurdack
Miconia axillaris	(Macfad.) Skean, Judd & Majure		Miconia axillaris (Macfad.) Skean, Judd & Majure
Miconia axinaeoides	Gleason		Miconia axinaeoides Gleason
Miconia ayacuchensis	Wurdack		Miconia ayacuchensis Wurdack
Miconia ayangannensis	(Wurdack) Michelang.		Miconia ayangannensis (Wurdack) Michelang.
Miconia ayisyena	Skean, Judd & Majure		Miconia ayisyena Skean, Judd & Majure
Miconia aymardii	Wurdack		Miconia aymardii Wurdack
Miconia badilloi	Michelang.		Miconia badilloi Michelang.
Miconia bahiana	R.Goldenb. & J.Coelho		Miconia bahiana R.Goldenb. & J.Coelho
Miconia bahorucensis	Skean, Judd & Majure		Miconia bahorucensis Skean, Judd & Majure
Miconia bailloniana	J.F. Macbr.		Miconia bailloniana J.F. Macbr.
Miconia baillonii	M. Gómez		Miconia baillonii M. Gómez
Miconia bairdiana	(Skean, Judd, Clase & Peguero) Skean & Judd		Miconia bairdiana (Skean, Judd, Clase & Peguero) Skean & Judd
Miconia balansae	(Cogn.) R. Goldenb.		Miconia balansae (Cogn.) R. Goldenb.
Miconia balbisiana	(Ser. ex DC.) Michelang.		Miconia balbisiana (Ser. ex DC.) Michelang.
Miconia bangii	Cogn.		Miconia bangii Cogn.
Miconia baracoana	M. Gómez		Miconia baracoana M. Gómez
Miconia baracoensis	Urb.		Miconia baracoensis Urb.
Miconia barahonensis	(Urb. & Ekman) Ionta & Judd		Miconia barahonensis (Urb. & Ekman) Ionta & Judd
Miconia barbata	(Borhidi) Judd, Bécquer & Majure		Miconia barbata (Borhidi) Judd, Bécquer & Majure
Miconia barbeyana	Cogn.		Miconia barbeyana Cogn.
Miconia barbinervis	(Benth.) Triana		Miconia barbinervis (Benth.) Triana
Miconia barbipetiolata	Michelang.		Miconia barbipetiolata Michelang.
Miconia barbipilis	Gleason		Miconia barbipilis Gleason
Miconia barclayana	Wurdack		Miconia barclayana Wurdack
Miconia barkeri	Urb. & Ekman		Miconia barkeri Urb. & Ekman
Miconia barkleyi	(Wurdack) Michelang.		Miconia barkleyi (Wurdack) Michelang.
Miconia basilensis	Urb. & Ekman		Miconia basilensis Urb. & Ekman
Miconia baumgratziana	R. Goldenb. & C.V. Martin		Miconia baumgratziana R. Goldenb. & C.V. Martin
Miconia bella	Wurdack		Miconia bella Wurdack
Miconia beneolens	Wurdack		Miconia beneolens Wurdack
Miconia benoistii	Wurdack		Miconia benoistii Wurdack
Miconia bensparrei	Gamba & Almeda		Miconia bensparrei Gamba & Almeda
Miconia benthamiana	Triana		Miconia benthamiana Triana
Miconia benthamii	(Naudin) Michelang.		Miconia benthamii (Naudin) Michelang.
Miconia bernardii	Wurdack		Miconia bernardii Wurdack
Miconia berteroi	(DC.) Judd & Ionta		Miconia berteroi (DC.) Judd & Ionta
Miconia biacuta	Cogn.		Miconia biacuta Cogn.
Miconia biappendiculata	(Naudin) L. Uribe		Miconia biappendiculata (Naudin) L. Uribe
Miconia bicolor	(Mill.) Triana		Miconia bicolor (Mill.) Triana
Miconia biflora	(Cogn.) Judd		Miconia biflora (Cogn.) Judd
Miconia biformis	Cogn.		Miconia biformis Cogn.
Miconia bigibbosa	(Cogn.) Michelang.		Miconia bigibbosa (Cogn.) Michelang.
Miconia biglandulosa	Gleason		Miconia biglandulosa Gleason
Miconia biglomerata	(Bonpl.) DC.		Miconia biglomerata (Bonpl.) DC.
Miconia bilopezii	Wurdack		Miconia bilopezii Wurdack
Miconia biolleyana	(Cogn.) Gamba & Almeda		Miconia biolleyana (Cogn.) Gamba & Almeda
Miconia bipatrialis	Wurdack		Miconia bipatrialis Wurdack
Miconia biperulifera	Cogn.		Miconia biperulifera Cogn.
Miconia birimosa	(Naudin) Skean, Judd & Majure		Miconia birimosa (Naudin) Skean, Judd & Majure
Miconia bisecundiflora	Ocampo & Almeda		Miconia bisecundiflora Ocampo & Almeda
Miconia biserrata	(DC.) Michelang.		Miconia biserrata (DC.) Michelang.
Miconia bissei	(Bécquer) Bécquer & Michelang.		Miconia bissei (Bécquer) Bécquer & Michelang.
Miconia bisulcata	Urb.		Miconia bisulcata Urb.
Miconia blakeifolia	Gleason		Miconia blakeifolia Gleason
Miconia blancheana	Urb.		Miconia blancheana Urb.
Miconia blepharodes	(DC.) R. Goldenb.		Miconia blepharodes (DC.) R. Goldenb.
Miconia boekei	(Wurdack) Gamba & Almeda		Miconia boekei (Wurdack) Gamba & Almeda
Miconia bolivarensis	Wurdack		Miconia bolivarensis Wurdack
Miconia boliviensis	Cogn.		Miconia boliviensis Cogn.
Miconia boomii	Wurdack		Miconia boomii Wurdack
Miconia bordoncilloana	Lozano & M.E. Morales		Miconia bordoncilloana Lozano & M.E. Morales
Miconia borhidiana	Judd, Bécquer & Majure		Miconia borhidiana Judd, Bécquer & Majure
Miconia borinquensis	Skean, Judd & Majure		Miconia borinquensis Skean, Judd & Majure
Miconia borjensis	Wurdack		Miconia borjensis Wurdack
Miconia brachyanthera	Triana		Miconia brachyanthera Triana
Miconia brachybotrya	Triana		Miconia brachybotrya Triana
Miconia brachycalyx	Triana		Miconia brachycalyx Triana
Miconia brachycentra	(Griseb.) M. Gómez		Miconia brachycentra (Griseb.) M. Gómez
Miconia brachygyna	Gleason		Miconia brachygyna Gleason
Miconia brachyloba	(Urb.) Bécquer		Miconia brachyloba (Urb.) Bécquer
Miconia brachystemon	(Urb.) Judd, Bécquer & Majure		Miconia brachystemon (Urb.) Judd, Bécquer & Majure
Miconia brackenridgei	(A. Gray) R. Goldenb.		Miconia brackenridgei (A. Gray) R. Goldenb.
Miconia bracteata	(DC.) Triana		Miconia bracteata (DC.) Triana
Miconia bracteolata	(Bonpl.) DC.		Miconia bracteolata (Bonpl.) DC.
Miconia bracteosa	(Naudin) Michelang.		Miconia bracteosa (Naudin) Michelang.
Miconia bractiflora	Gamba & Almeda		Miconia bractiflora Gamba & Almeda
Miconia bradeana	Baumgratz & R. Goldenb.		Miconia bradeana Baumgratz & R. Goldenb.
Miconia brasiliensis	Triana		Miconia brasiliensis Triana
Miconia brenesii	Standl.		Miconia brenesii Standl.
Miconia breteleri	Wurdack		Miconia breteleri Wurdack
Miconia breviflora	(Cogn.) R. Goldenb.		Miconia breviflora (Cogn.) R. Goldenb.
Miconia brevifolia	(Urb. & Ekman) Skean & Judd		Miconia brevifolia (Urb. & Ekman) Skean & Judd
Miconia brevipes	Benth.		Miconia brevipes Benth.
Miconia brevis	J.F. Macbr.		Miconia brevis J.F. Macbr.
Miconia brevistylis	Cogn.		Miconia brevistylis Cogn.
Miconia brevitheca	Gleason		Miconia brevitheca Gleason
Miconia brigitteae	H. Mend. & Posada-Herrera		Miconia brigitteae H. Mend. & Posada-Herrera
Miconia brittonii	Cogn.		Miconia brittonii Cogn.
Miconia broadwayi	(Urb.) Michelang.		Miconia broadwayi (Urb.) Michelang.
Miconia brunescens	(Urb.) Bécquer & Skean		Miconia brunescens (Urb.) Bécquer & Skean
Miconia brunnea	Mart. ex DC.		Miconia brunnea Mart. ex DC.
Miconia bubalina	(D. Don) Naudin		Miconia bubalina (D. Don) Naudin
Miconia bucherae	Alain		Miconia bucherae Alain
Miconia buddlejoides	Triana		Miconia buddlejoides Triana
Miconia bullata	(Turcz.) Triana		Miconia bullata (Turcz.) Triana
Miconia bullatifolia	Michelang.		Miconia bullatifolia Michelang.
Miconia bullifera	(Mart. & Schrank ex DC.) Michelang.		Miconia bullifera (Mart. & Schrank ex DC.) Michelang.
Miconia bullosa	(DC.) Michelang.		Miconia bullosa (DC.) Michelang.
Miconia bullotricha	Bécquer & Majure		Miconia bullotricha Bécquer & Majure
Miconia buntingii	Wurdack		Miconia buntingii Wurdack
Miconia burchellii	Triana		Miconia burchellii Triana
Miconia buxifolia	Naudin		Miconia buxifolia Naudin
Miconia cabraliensis	(Wurdack) R. Goldenb.		Miconia cabraliensis (Wurdack) R. Goldenb.
Miconia cabucu	Hoehne		Miconia cabucu Hoehne
Miconia cacatin	(Aubl.) S.S. Renner		Miconia cacatin (Aubl.) S.S. Renner
Miconia cacumina	Wurdack		Miconia cacumina Wurdack
Miconia caelata	(Bonpl.) DC.		Miconia caelata (Bonpl.) DC.
Miconia caelestis	(Standl.) Michelang.		Miconia caelestis (Standl.) Michelang.
Miconia caerulea	(Pav. ex D. Don) Naudin		Miconia caerulea (Pav. ex D. Don) Naudin
Miconia caesariata	Wurdack		Miconia caesariata Wurdack
Miconia caesia	Cogn. & Gleason		Miconia caesia Cogn. & Gleason
Miconia caiuia	E.C.O. Chagas & R. Goldenb.		Miconia caiuia E.C.O. Chagas & R. Goldenb.
Miconia cajalbanensis	Judd, Bécquer & Majure		Miconia cajalbanensis Judd, Bécquer & Majure
Miconia cajanumana	Wurdack		Miconia cajanumana Wurdack
Miconia calignosa	Wurdack		Miconia calignosa Wurdack
Miconia calocoma	Almeda		Miconia calocoma Almeda
Miconia calvescens	DC.		Miconia calvescens DC.
Miconia calycina	Cogn.		Miconia calycina Cogn.
Miconia calycopteris	(Rich.) Judd, Bécquer & Majure		Miconia calycopteris (Rich.) Judd, Bécquer & Majure
Miconia campanensis	Urb. & Ekman		Miconia campanensis Urb. & Ekman
Miconia campestris	(Benth.) Triana		Miconia campestris (Benth.) Triana
Miconia campii	Wurdack		Miconia campii Wurdack
Miconia camporum	(Brade) R. Goldenb.		Miconia camporum (Brade) R. Goldenb.
Miconia canaguensis	Wurdack		Miconia canaguensis Wurdack
Miconia canaimana	Michelang.		Miconia canaimana Michelang.
Miconia cancellata	(Cogn.) R. Goldenb.		Miconia cancellata (Cogn.) R. Goldenb.
Miconia candelabrum	(J.F. Macbr.) R. Goldenb.		Miconia candelabrum (J.F. Macbr.) R. Goldenb.
Miconia cannabina	Markgr.		Miconia cannabina Markgr.
Miconia canoi	Michelang. & D.F. Paredes		Miconia canoi Michelang. & D.F. Paredes
Miconia capillaris	(Sw.) M. Gomez		Miconia capillaris (Sw.) M. Gomez
Miconia capilliflora	(Naudin) R. Goldenb.		Miconia capilliflora (Naudin) R. Goldenb.
Miconia capillinervis	Ionta & Judd		Miconia capillinervis Ionta & Judd
Miconia capillipes	(Triana) Michelang.		Miconia capillipes (Triana) Michelang.
Miconia capitellata	Cogn.		Miconia capitellata Cogn.
Miconia capixaba	R. Goldenb.		Miconia capixaba R. Goldenb.
Miconia caquetana	(Sprague) Michelang.		Miconia caquetana (Sprague) Michelang.
Miconia caquetensis	(Gleason) Ocampo & Almeda		Miconia caquetensis (Gleason) Ocampo & Almeda
Miconia carassana	Cogn.		Miconia carassana Cogn.
Miconia cardenasiae	Jan. M. Burke & Michelang.		Miconia cardenasiae Jan. M. Burke & Michelang.
Miconia carnea	Cogn.		Miconia carnea Cogn.
Miconia carolensis	(Gleason) Michelang.		Miconia carolensis (Gleason) Michelang.
Miconia carpishana	Wurdack		Miconia carpishana Wurdack
Miconia caryophyllaea	(DC.) Triana		Miconia caryophyllaea (DC.) Triana
Miconia castaneiflora	Naudin		Miconia castaneiflora Naudin
Miconia castillensis	Wurdack		Miconia castillensis Wurdack
Miconia castrensis	Wurdack		Miconia castrensis Wurdack
Miconia cataractae	Triana		Miconia cataractae Triana
Miconia catharinensis	(Cogn.) R. Goldenb.		Miconia catharinensis (Cogn.) R. Goldenb.
Miconia caucana	Gleason		Miconia caucana Gleason
Miconia caudata	(Bonpl.) DC.		Miconia caudata (Bonpl.) DC.
Miconia caudatifolia	Michelang.		Miconia caudatifolia Michelang.
Miconia caudiculata	Pittier		Miconia caudiculata Pittier
Miconia caudigera	DC.		Miconia caudigera DC.
Miconia cauingia	J.F. Macbr.		Miconia cauingia J.F. Macbr.
Miconia cautis	Wurdack		Miconia cautis Wurdack
Miconia cava	Michelang. & R. Goldenb.		Miconia cava Michelang. & R. Goldenb.
Miconia cazaletii	Wurdack		Miconia cazaletii Wurdack
Miconia celaquensis	Almeda		Miconia celaquensis Almeda
Miconia centrodesma	Naudin		Miconia centrodesma Naudin
Miconia centrodesmoides	Wurdack		Miconia centrodesmoides Wurdack
Miconia centronioides	Gleason		Miconia centronioides Gleason
Miconia centrophora	Naudin		Miconia centrophora Naudin
Miconia centrosperma	Almeda		Miconia centrosperma Almeda
Miconia cephaloides	Michelang.		Miconia cephaloides Michelang.
Miconia ceramicarpa	(DC.) Cogn.		Miconia ceramicarpa (DC.) Cogn.
Miconia cerasiflora	Urb.		Miconia cerasiflora Urb.
Miconia cercophora	Wurdack		Miconia cercophora Wurdack
Miconia cernua	Naudin		Miconia cernua Naudin
Miconia cernuiflora	Jan. M. Burke & Michelang.		Miconia cernuiflora Jan. M. Burke & Michelang.
Miconia chaetocalyx	(A. Gray) R. Goldenb.		Miconia chaetocalyx (A. Gray) R. Goldenb.
Miconia chaetodon	Naudin		Miconia chaetodon Naudin
Miconia chaetodonta	R. Goldenb. & Michelang.		Miconia chaetodonta R. Goldenb. & Michelang.
Miconia chamissois	Naudin		Miconia chamissois Naudin
Miconia chapensis	E. Cotton & W. Meier		Miconia chapensis E. Cotton & W. Meier
Miconia charadrophila	(Tutin) Michelang.		Miconia charadrophila (Tutin) Michelang.
Miconia charleswrightii	Bécquer & Judd		Miconia charleswrightii Bécquer & Judd
Miconia chartacea	Triana		Miconia chartacea Triana
Miconia chemillensis	L.A. Cárdenas		Miconia chemillensis L.A. Cárdenas
Miconia chichirivichensis	Michelang.		Miconia chichirivichensis Michelang.
Miconia chimantensis	(Wurdack) Michelang.		Miconia chimantensis (Wurdack) Michelang.
Miconia chinantlana	(Naudin) Almeda		Miconia chinantlana (Naudin) Almeda
Miconia chionophila	Naudin		Miconia chionophila Naudin
Miconia chiriquiensis	Almeda		Miconia chiriquiensis Almeda
Miconia chlorocarpa	Cogn.		Miconia chlorocarpa Cogn.
Miconia chocoensis	(Wurdack) Gamba & Almeda		Miconia chocoensis (Wurdack) Gamba & Almeda
Miconia choriophylla	Wurdack		Miconia choriophylla Wurdack
Miconia christophoriana	(Ham.) DC		Miconia christophoriana (Ham.) DC
Miconia chrysocoma	Gleason		Miconia chrysocoma Gleason
Miconia chrysoneura	Triana		Miconia chrysoneura Triana
Miconia chrysophylla	(Rich.) Urb.		Miconia chrysophylla (Rich.) Urb.
Miconia ciliaris	Triana		Miconia ciliaris Triana
Miconia ciliata	(Rich.) DC.		Miconia ciliata (Rich.) DC.
Miconia ciliolata	(Cogn.) R. Goldenb.		Miconia ciliolata (Cogn.) R. Goldenb.
Miconia cinchonifolia	DC.		Miconia cinchonifolia DC.
Miconia cineana	Majure, Judd, Ionta & Skean		Miconia cineana Majure, Judd, Ionta & Skean
Miconia cinerascens	Miq.		Miconia cinerascens Miq.
Miconia cinerea	Cogn.		Miconia cinerea Cogn.
Miconia cinereiformis	Ionta, Judd & Skean		Miconia cinereiformis Ionta, Judd & Skean
Miconia cinnabarina	Jan. M. Burke & Michelang.		Miconia cinnabarina Jan. M. Burke & Michelang.
Miconia cinnamomea	Beurl.		Miconia cinnamomea Beurl.
Miconia cinnamomifolia	(DC.) Naudin		Miconia cinnamomifolia (DC.) Naudin
Miconia cionotricha	L. Uribe		Miconia cionotricha L. Uribe
Miconia cipoensis	R. Goldenb.		Miconia cipoensis R. Goldenb.
Miconia circumscissa	(Cogn.) R. Goldenb.		Miconia circumscissa (Cogn.) R. Goldenb.
Miconia cladonia	Gleason		Miconia cladonia Gleason
Miconia clandestina	(Almeda) Almeda		Miconia clandestina (Almeda) Almeda
Miconia clasei	Majure, Skean & Judd		Miconia clasei Majure, Skean & Judd
Miconia clathrantha	Triana ex Cogn.		Miconia clathrantha Triana ex Cogn.
Miconia cleefii	L. Uribe		Miconia cleefii L. Uribe
Miconia clementiana	(Britton) Bécquer & Majure		Miconia clementiana (Britton) Bécquer & Majure
Miconia clementii	(P. Wilson) Bécquer		Miconia clementii (P. Wilson) Bécquer
Miconia clivorum	Wurdack		Miconia clivorum Wurdack
Miconia clypeata	Wurdack		Miconia clypeata Wurdack
Miconia coadunata	(Wurdack) R. Goldenb.		Miconia coadunata (Wurdack) R. Goldenb.
Miconia coarctiflora	(Wurdack) Ocampo & Almeda		Miconia coarctiflora (Wurdack) Ocampo & Almeda
Miconia coccinea	(Rich.) Judd & Skean		Miconia coccinea (Rich.) Judd & Skean
Miconia cocoensis	Almeda & Kriebel		Miconia cocoensis Almeda & Kriebel
Miconia codonostigma	Gleason & Wurdack		Miconia codonostigma Gleason & Wurdack
Miconia coelestis	(Pav. ex D. Don) Naudin		Miconia coelestis (Pav. ex D. Don) Naudin
Miconia cogniauxii	(Glaz. ex D'El Rei Souza) R. Goldenb.		Miconia cogniauxii (Glaz. ex D'El Rei Souza) R. Goldenb.
Miconia collatata	Wurdack		Miconia collatata Wurdack
Miconia collayensis	Wurdack		Miconia collayensis Wurdack
Miconia colliculosa	Almeda		Miconia colliculosa Almeda
Miconia coloradensis	Almeda		Miconia coloradensis Almeda
Miconia commutata	Almeda		Miconia commutata Almeda
Miconia comosa	Cogn.		Miconia comosa Cogn.
Miconia complanata	Jan. M. Burke, Michelang. & D. Fernández		Miconia complanata Jan. M. Burke, Michelang. & D. Fernández
Miconia compressa	Naudin		Miconia compressa Naudin
Miconia compressicaulis	Wurdack		Miconia compressicaulis Wurdack
Miconia comptifolia	Wurdack		Miconia comptifolia Wurdack
Miconia concinna	Almeda		Miconia concinna Almeda
Miconia condylata	Wurdack		Miconia condylata Wurdack
Miconia confertiflora	Almeda		Miconia confertiflora Almeda
Miconia conformis	Wurdack		Miconia conformis Wurdack
Miconia conglomerata	(DC.) Michelang.		Miconia conglomerata (DC.) Michelang.
Miconia conica	Skean, Judd & Majure		Miconia conica Skean, Judd & Majure
Miconia coniophora	Urb. & Ekman		Miconia coniophora Urb. & Ekman
Miconia conoapiculata	Michelang.		Miconia conoapiculata Michelang.
Miconia conoattenuata	Michelang.		Miconia conoattenuata Michelang.
Miconia conobracteata	Michelang.		Miconia conobracteata Michelang.
Miconia conobrenesii	Michelang.		Miconia conobrenesii Michelang.
Miconia conocentronioides	Michelang.		Miconia conocentronioides Michelang.
Miconia conochiriquensis	Michelang.		Miconia conochiriquensis Michelang.
Miconia conocuatrecasii	Michelang.		Miconia conocuatrecasii Michelang.
Miconia conodentata	Michelang.		Miconia conodentata Michelang.
Miconia conohirtella	Michelang.		Miconia conohirtella Michelang.
Miconia conolancifolia	Michelang.		Miconia conolancifolia Michelang.
Miconia conomacrantha	Michelang.		Miconia conomacrantha Michelang.
Miconia conomicrantha	Michelang.		Miconia conomicrantha Michelang.
Miconia conoplumosa	Michelang.		Miconia conoplumosa Michelang.
Miconia conorubiginosa	Michelang.		Miconia conorubiginosa Michelang.
Miconia conorufescens	Michelang.		Miconia conorufescens Michelang.
Miconia conosetifera	Michelang.		Miconia conosetifera Michelang.
Miconia conosetosa	Michelang.		Miconia conosetosa Michelang.
Miconia conospeciosa	Michelang.		Miconia conospeciosa Michelang.
Miconia contrerasii	Wurdack		Miconia contrerasii Wurdack
Miconia cookii	Gleason		Miconia cookii Gleason
Miconia cooperi	(Cogn.) Michelang.		Miconia cooperi (Cogn.) Michelang.
Miconia corallina	Spring		Miconia corallina Spring
Miconia corazonica	Wurdack		Miconia corazonica Wurdack
Miconia corcovadensis	(Raddi) R. Goldenb.		Miconia corcovadensis (Raddi) R. Goldenb.
Miconia cordata	Triana		Miconia cordata Triana
Miconia cordifolia	Wurdack		Miconia cordifolia Wurdack
Miconia cordigera	(Triana) R. Goldenb.		Miconia cordigera (Triana) R. Goldenb.
Miconia cordilamina	Judd & Bécquer		Miconia cordilamina Judd & Bécquer
Miconia coriacea	(Sw.) DC.		Miconia coriacea (Sw.) DC.
Miconia cornifera	Humberto Mend., Posada-Herrera & Heriberto David		Miconia cornifera Humberto Mend., Posada-Herrera & Heriberto David
Miconia cornifolia	(Desr.) Naudin		Miconia cornifolia (Desr.) Naudin
Miconia cornoides	(Schltdl. & Cham.) Almeda		Miconia cornoides (Schltdl. & Cham.) Almeda
Miconia cornuta	(Lozano & N. Ruiz-R.) Almeda & Alvear		Miconia cornuta (Lozano & N. Ruiz-R.) Almeda & Alvear
Miconia coronata	(Bonpl.) DC.		Miconia coronata (Bonpl.) DC.
Miconia coronifera	Wurdack		Miconia coronifera Wurdack
Miconia correae	Almeda		Miconia correae Almeda
Miconia corymbiformis	Cogn.		Miconia corymbiformis Cogn.
Miconia corymbosa	(Rich.) Judd & Skean		Miconia corymbosa (Rich.) Judd & Skean
Miconia cosangensis	Wurdack		Miconia cosangensis Wurdack
Miconia costaricensis	Cogn.		Miconia costaricensis Cogn.
Miconia costata	(Urb.) Judd, Bécquer & Majure		Miconia costata (Urb.) Judd, Bécquer & Majure
Miconia costoides	(Michelang.) Michelang.		Miconia costoides (Michelang.) Michelang.
Miconia cottoniana	Michelang.		Miconia cottoniana Michelang.
Miconia cowanii	Wurdack		Miconia cowanii Wurdack
Miconia crassifolia	Triana		Miconia crassifolia Triana
Miconia crassinervia	Cogn.		Miconia crassinervia Cogn.
Miconia crassinervis	(Urb.) Skean, Judd & Majure		Miconia crassinervis (Urb.) Skean, Judd & Majure
Miconia crassipes	Triana		Miconia crassipes Triana
Miconia crassistigma	Cogn.		Miconia crassistigma Cogn.
Miconia crebribullata	Wurdack		Miconia crebribullata Wurdack
Miconia cremadena	Gleason		Miconia cremadena Gleason
Miconia cremersii	(Wurdack) Ocampo & Almeda		Miconia cremersii (Wurdack) Ocampo & Almeda
Miconia cremophylla	Naudin		Miconia cremophylla Naudin
Miconia crenata	(Vahl) Michelang.		Miconia crenata (Vahl) Michelang.
Miconia crenulata	(Gleason) Michelang.		Miconia crenulata (Gleason) Michelang.
Miconia cretacea	Gleason		Miconia cretacea Gleason
Miconia crinita	Naudin		Miconia crinita Naudin
Miconia cristalensis	(Borhidi) Judd, Bécquer & Majure		Miconia cristalensis (Borhidi) Judd, Bécquer & Majure
Miconia cristata	(Reginato & R. Goldenb.) R. Goldenb.		Miconia cristata (Reginato & R. Goldenb.) R. Goldenb.
Miconia croatii	(Almeda) Michelang. & Almeda		Miconia croatii (Almeda) Michelang. & Almeda
Miconia crocata	Almeda		Miconia crocata Almeda
Miconia crocea	(Desr.) Naudin		Miconia crocea (Desr.) Naudin
Miconia crocina	Michelang.		Miconia crocina Michelang.
Miconia crossosepala	(Griseb.) Michelang.		Miconia crossosepala (Griseb.) Michelang.
Miconia crotonifolia	(Desr.) Judd & Ionta		Miconia crotonifolia (Desr.) Judd & Ionta
Miconia cruenta	Triana		Miconia cruenta Triana
Miconia cuatrecasasii	Markgr.		Miconia cuatrecasasii Markgr.
Miconia cubacinerea	Majure & Judd		Miconia cubacinerea Majure & Judd
Miconia cubana	(Alain) Majure & Judd		Miconia cubana (Alain) Majure & Judd
Miconia cubatanensis	Hoehne		Miconia cubatanensis Hoehne
Miconia cubensis	(C. Wright ex Griseb.) C. Wright		Miconia cubensis (C. Wright ex Griseb.) C. Wright
Miconia cucullata	(Gleason) Michelang.		Miconia cucullata (Gleason) Michelang.
Miconia cundinamarcensis	Wurdack		Miconia cundinamarcensis Wurdack
Miconia cuneata	Triana ex Cogn.		Miconia cuneata Triana ex Cogn.
Miconia cuneatissima	R. Goldenb. & Michelang.		Miconia cuneatissima R. Goldenb. & Michelang.
Miconia cupeyalensis	Bécquer & Michelang.		Miconia cupeyalensis Bécquer & Michelang.
Miconia cuprea	Wurdack		Miconia cuprea Wurdack
Miconia cursoris	(Wurdack) Michelang.		Miconia cursoris (Wurdack) Michelang.
Miconia curta	(Gleason) Wurdack		Miconia curta (Gleason) Wurdack
Miconia curvipila	(Urb. & Ekman) Ionta, Judd & Skean		Miconia curvipila (Urb. & Ekman) Ionta, Judd & Skean
Miconia cuspidata	Mart. ex Naudin		Miconia cuspidata Mart. ex Naudin
Miconia cuspidatissima	Pittier		Miconia cuspidatissima Pittier
Miconia cutucuensis	Wurdack		Miconia cutucuensis Wurdack
Miconia cyanocarpa	Naudin		Miconia cyanocarpa Naudin
Miconia cyathanthera	Triana		Miconia cyathanthera Triana
Miconia cymifera	(Donn. Sm.) Michelang.		Miconia cymifera (Donn. Sm.) Michelang.
Miconia daironii	Michelang.		Miconia daironii Michelang.
Miconia danielii	Almeda		Miconia danielii Almeda
Miconia dapsiliflora	Wurdack		Miconia dapsiliflora Wurdack
Miconia dasyclada	Wurdack		Miconia dasyclada Wurdack
Miconia dasytricha	(A. Gray) R. Goldenb.		Miconia dasytricha (A. Gray) R. Goldenb.
Miconia davidsei	(Almeda) Almeda		Miconia davidsei (Almeda) Almeda
Miconia debilis	(Crueg.) Michelang.		Miconia debilis (Crueg.) Michelang.
Miconia decipiens	Cogn.		Miconia decipiens Cogn.
Miconia decorticans	(Bécquer) Bécquer & Majure		Miconia decorticans (Bécquer) Bécquer & Majure
Miconia decurrens	Cogn.		Miconia decurrens Cogn.
Miconia deflexa	(O. Berg ex Triana) R. Goldenb.		Miconia deflexa (O. Berg ex Triana) R. Goldenb.
Miconia delicatula	A. Rich.		Miconia delicatula A. Rich.
Miconia demissifolia	Wurdack		Miconia demissifolia Wurdack
Miconia dendroides	(Naudin) R. Goldenb.		Miconia dendroides (Naudin) R. Goldenb.
Miconia densifolia	Cogn.		Miconia densifolia Cogn.
Miconia dentata	(D. Don) Michelang.		Miconia dentata (D. Don) Michelang.
Miconia denticulata	Naudin		Miconia denticulata Naudin
Miconia dependens	(Pav. ex D. Don) Judd & Majure		Miconia dependens (Pav. ex D. Don) Judd & Majure
Miconia desiliens	(Gleason) Michelang.		Miconia desiliens (Gleason) Michelang.
Miconia desmantha	Benth.		Miconia desmantha Benth.
Miconia desportesii	Urb.		Miconia desportesii Urb.
Miconia diaphanea	Gleason		Miconia diaphanea Gleason
Miconia dichroa	Cogn.		Miconia dichroa Cogn.
Miconia dichrophylla	J.F. Macbr.		Miconia dichrophylla J.F. Macbr.
Miconia diegogomezii	Kriebel & Almeda		Miconia diegogomezii Kriebel & Almeda
Miconia dielsiana	Urb.		Miconia dielsiana Urb.
Miconia dielsii	Markgr.		Miconia dielsii Markgr.
Miconia difficilis	Triana		Miconia difficilis Triana
Miconia diffusa	(Cogn.) R. Goldenb.		Miconia diffusa (Cogn.) R. Goldenb.
Miconia diguensis	(Wurdack) Michelang.		Miconia diguensis (Wurdack) Michelang.
Miconia dimorphica	(J.F. Macbr.) Michelang.		Miconia dimorphica (J.F. Macbr.) Michelang.
Miconia dimorphotheca	Jan. M. Burke & Michelang.		Miconia dimorphotheca Jan. M. Burke & Michelang.
Miconia dioica	Wurdack		Miconia dioica Wurdack
Miconia dipsacea	Naudin		Miconia dipsacea Naudin
Miconia discoidea	(Lozano & N. Ruiz-R.) Almeda & Alvear		Miconia discoidea (Lozano & N. Ruiz-R.) Almeda & Alvear
Miconia discolor	DC.		Miconia discolor DC.
Miconia discolorata	Bécquer & Michelang.		Miconia discolorata Bécquer & Michelang.
Miconia dispar	Benth.		Miconia dispar Benth.
Miconia dissimulans	Wurdack		Miconia dissimulans Wurdack
Miconia dissita	Almeda		Miconia dissita Almeda
Miconia dissitiflora	Almeda		Miconia dissitiflora Almeda
Miconia dissitinervia	Kriebel, Almeda & A. Estrada		Miconia dissitinervia Kriebel, Almeda & A. Estrada
Miconia disticha	Michelang.		Miconia disticha Michelang.
Miconia divaricata	Gardner		Miconia divaricata Gardner
Miconia divaricatiflora	Judd & Bécquer		Miconia divaricatiflora Judd & Bécquer
Miconia divergens	Triana		Miconia divergens Triana
Miconia divisoriana	Wurdack		Miconia divisoriana Wurdack
Miconia dodecandra	Cogn.		Miconia dodecandra Cogn.
Miconia dodsonii	Wurdack		Miconia dodsonii Wurdack
Miconia dolichantha	(Naudin) R. Goldenb.		Miconia dolichantha (Naudin) R. Goldenb.
Miconia dolichodons	(Cogn.) R. Goldenb.		Miconia dolichodons (Cogn.) R. Goldenb.
Miconia dolichopoda	Naudin		Miconia dolichopoda Naudin
Miconia dolichorrhyncha	Naudin		Miconia dolichorrhyncha Naudin
Miconia dolichostachya	(Naudin) R. Goldenb.		Miconia dolichostachya (Naudin) R. Goldenb.
Miconia domatiata	(Urb. & Ekman) Skean & Judd		Miconia domatiata (Urb. & Ekman) Skean & Judd
Miconia domingensis	Cogn.		Miconia domingensis Cogn.
Miconia dominicensis	(Penneys & Judd) Penneys		Miconia dominicensis (Penneys & Judd) Penneys
Miconia domociliata	Michelang.		Miconia domociliata Michelang.
Miconia doniana	Naudin		Miconia doniana Naudin
Miconia dorsaliporosa	R. Goldenb. & Reginato		Miconia dorsaliporosa R. Goldenb. & Reginato
Miconia dorsiloba	Gleason		Miconia dorsiloba Gleason
Miconia drosera	(Sagot) Michelang.		Miconia drosera (Sagot) Michelang.
Miconia dubia	(DC.) R. Goldenb.		Miconia dubia (DC.) R. Goldenb.
Miconia duckei	Cogn.		Miconia duckei Cogn.
Miconia dudleyi	Wurdack		Miconia dudleyi Wurdack
Miconia duidae	(Gleason) Michelang.		Miconia duidae (Gleason) Michelang.
Miconia dulcis	Jan. M. Burke & Michelang.		Miconia dulcis Jan. M. Burke & Michelang.
Miconia dumetosa	Cogn.		Miconia dumetosa Cogn.
Miconia dunstervillei	Wurdack		Miconia dunstervillei Wurdack
Miconia dura	Triana		Miconia dura Triana
Miconia durandii	Michelang. & P.Jørg		Miconia durandii Michelang. & P.Jørg
Miconia dusenii	(Cogn.) R. Goldenb.		Miconia dusenii (Cogn.) R. Goldenb.
Miconia ebracteata	(Triana) R. Goldenb.		Miconia ebracteata (Triana) R. Goldenb.
Miconia echinata	(Griseb.) Judd, Bécquer & Majure		Miconia echinata (Griseb.) Judd, Bécquer & Majure
Miconia echinocarpa	Judd, Bécquer & Majure		Miconia echinocarpa Judd, Bécquer & Majure
Miconia ecuadorensis	(Gleason) Michelang.		Miconia ecuadorensis (Gleason) Michelang.
Miconia edentula	(Gleason) Michelang.		Miconia edentula (Gleason) Michelang.
Miconia egensis	Cogn.		Miconia egensis Cogn.
Miconia egregia	Wurdack		Miconia egregia Wurdack
Miconia eichleri	Cogn.		Miconia eichleri Cogn.
Miconia ekmanii	(Urb.) Judd, Bécquer & Majure		Miconia ekmanii (Urb.) Judd, Bécquer & Majure
Miconia elaeodendron	(DC.) Naudin		Miconia elaeodendron (DC.) Naudin
Miconia elaeoides	Naudin		Miconia elaeoides Naudin
Miconia elata	(Sw.) DC.		Miconia elata (Sw.) DC.
Miconia eleagnoides	(Sw.) Griseb.		Miconia eleagnoides (Sw.) Griseb.
Miconia elegans	Cogn.		Miconia elegans Cogn.
Miconia elegantissima	Bécquer & Judd		Miconia elegantissima Bécquer & Judd
Miconia ellipsoidea	(Urb. & Ekman) Ionta, Judd & Skean		Miconia ellipsoidea (Urb. & Ekman) Ionta, Judd & Skean
Miconia ellsworthii	Michelang.		Miconia ellsworthii Michelang.
Miconia elongata	Cogn.		Miconia elongata Cogn.
Miconia elvirae	Wurdack		Miconia elvirae Wurdack
Miconia emendata	Wurdack		Miconia emendata Wurdack
Miconia epibaterium	(DC.) Michelang.		Miconia epibaterium (DC.) Michelang.
Miconia eremita	L. Uribe		Miconia eremita L. Uribe
Miconia erikasplundii	Gamba & Almeda		Miconia erikasplundii Gamba & Almeda
Miconia erikmaniana	Skean & Judd		Miconia erikmaniana Skean & Judd
Miconia eriocalyx	Cogn.		Miconia eriocalyx Cogn.
Miconia erioclada	Triana		Miconia erioclada Triana
Miconia eriodonta	DC.		Miconia eriodonta DC.
Miconia ernstii	Wurdack		Miconia ernstii Wurdack
Miconia ernstulei	Michelang.		Miconia ernstulei Michelang.
Miconia erosa	Gleason		Miconia erosa Gleason
Miconia erostrata	(DC.) R. Goldenb.		Miconia erostrata (DC.) R. Goldenb.
Miconia erythrantha	Naudin		Miconia erythrantha Naudin
Miconia erythropogon	(DC.) Judd & Ionta		Miconia erythropogon (DC.) Judd & Ionta
Miconia espinosae	Markgr.		Miconia espinosae Markgr.
Miconia eugenioides	Triana		Miconia eugenioides Triana
Miconia euphorbioides	(Naudin) R. Goldenb.		Miconia euphorbioides (Naudin) R. Goldenb.
Miconia evanescens	(Almeda) Gamba & Almeda		Miconia evanescens (Almeda) Gamba & Almeda
Miconia expansa	Gleason		Miconia expansa Gleason
Miconia explicita	Wurdack		Miconia explicita Wurdack
Miconia extinctoria	(Bonpl.) Michelang.		Miconia extinctoria (Bonpl.) Michelang.
Miconia fabianiana	Mabb.		Miconia fabianiana Mabb.
Miconia fadyenii	(Hook.) Judd & Skean		Miconia fadyenii (Hook.) Judd & Skean
Miconia falcata	Cogn.		Miconia falcata Cogn.
Miconia fallacissima	(Markgr.) R. Goldenb.		Miconia fallacissima (Markgr.) R. Goldenb.
Miconia fallax	DC.		Miconia fallax DC.
Miconia fanshawei	Wurdack		Miconia fanshawei Wurdack
Miconia farfanii	Jan. M. Burke & Michelang.		Miconia farfanii Jan. M. Burke & Michelang.
Miconia farinasii	(Wurdack) Michelang.		Miconia farinasii (Wurdack) Michelang.
Miconia fasciculata	Gardner		Miconia fasciculata Gardner
Miconia fastigiata	(Cogn.) R. Goldenb.		Miconia fastigiata (Cogn.) R. Goldenb.
Miconia fausta	(Wurdack) Michelang.		Miconia fausta (Wurdack) Michelang.
Miconia favosa	(Desr.) Naudin		Miconia favosa (Desr.) Naudin
Miconia fenestrata	(Benth.) Michelang.		Miconia fenestrata (Benth.) Michelang.
Miconia ferreyrae	Wurdack		Miconia ferreyrae Wurdack
Miconia ferruginata	DC.		Miconia ferruginata DC.
Miconia ferruginea	(Desr.) DC.		Miconia ferruginea (Desr.) DC.
Miconia fictilis	(J.F. Macbr.) Michelang. & R. Goldenb.		Miconia fictilis (J.F. Macbr.) Michelang. & R. Goldenb.
Miconia filamentosa	Gleason		Miconia filamentosa Gleason
Miconia filiformis	(Gleason) Michelang.		Miconia filiformis (Gleason) Michelang.
Miconia filisepala	(Urb.) Judd, Bécquer & Majure		Miconia filisepala (Urb.) Judd, Bécquer & Majure
Miconia firma	J.F. Macbr.		Miconia firma J.F. Macbr.
Miconia fissa	Gleason		Miconia fissa Gleason
Miconia fissinervia	(Gleason) Michelang.		Miconia fissinervia (Gleason) Michelang.
Miconia flaccida	Gleason		Miconia flaccida Gleason
Miconia flammea	Casar.		Miconia flammea Casar.
Miconia flavescens	Cogn.		Miconia flavescens Cogn.
Miconia flexuosa	(Triana) Michelang.		Miconia flexuosa (Triana) Michelang.
Miconia floccosa	Cogn.		Miconia floccosa Cogn.
Miconia florbella	Schnell ex Michelang. & R.Goldenb.		Miconia florbella Schnell ex Michelang. & R.Goldenb.
Miconia floribunda	(Bonpl.) DC.		Miconia floribunda (Bonpl.) DC.
Miconia fluminensis	Ule		Miconia fluminensis Ule
Miconia foliosa	Triana		Miconia foliosa Triana
Miconia folsomii	(Almeda) Almeda		Miconia folsomii (Almeda) Almeda
Miconia fontanae	(Reginato & R. Goldenb.) R. Goldenb.		Miconia fontanae (Reginato & R. Goldenb.) R. Goldenb.
Miconia foreroi	(Wurdack) Michelang.		Miconia foreroi (Wurdack) Michelang.
Miconia formicaria	Gamba & Almeda		Miconia formicaria Gamba & Almeda
Miconia formicocollina	Michelang.		Miconia formicocollina Michelang.
Miconia formicofoliosa	Michelang.		Miconia formicofoliosa Michelang.
Miconia formicoheterophylla	Michelang.		Miconia formicoheterophylla Michelang.
Miconia formicojuruensis	Michelang.		Miconia formicojuruensis Michelang.
Miconia formicosetosa	Michelang.		Miconia formicosetosa Michelang.
Miconia formonense	(Judd, Skean & Clase) Judd, Bécquer & Majure		Miconia formonense (Judd, Skean & Clase) Judd, Bécquer & Majure
Miconia formosa	Cogn.		Miconia formosa Cogn.
Miconia forzzae	R. Goldenb. & Hinoshita		Miconia forzzae R. Goldenb. & Hinoshita
Miconia fosbergii	Wurdack		Miconia fosbergii Wurdack
Miconia fosteri	Wurdack		Miconia fosteri Wurdack
Miconia foveolata	Cogn.		Miconia foveolata Cogn.
Miconia fragilis	Naudin		Miconia fragilis Naudin
Miconia fragrans	Cogn.		Miconia fragrans Cogn.
Miconia fragrantissima	(Almeda) Michelang. & Almeda		Miconia fragrantissima (Almeda) Michelang. & Almeda
Miconia francavillana	Cogn.		Miconia francavillana Cogn.
Miconia fraterna	(Gleason) Michelang.		Miconia fraterna (Gleason) Michelang.
Miconia freyreissii	(Cogn.) R. Goldenb.		Miconia freyreissii (Cogn.) R. Goldenb.
Miconia friedmaniorum	Almeda & Umaña		Miconia friedmaniorum Almeda & Umaña
Miconia friedrichlehmannii	R. Goldenb.		Miconia friedrichlehmannii R. Goldenb.
Miconia frontinoana	Cogn. & Gleason		Miconia frontinoana Cogn. & Gleason
Miconia fruticulosa	Cogn.		Miconia fruticulosa Cogn.
Miconia fuertesii	Cogn.		Miconia fuertesii Cogn.
Miconia fuliginosa	Wurdack		Miconia fuliginosa Wurdack
Miconia fulvostellata	L.O. Williams		Miconia fulvostellata L.O. Williams
Miconia funckii	Wurdack		Miconia funckii Wurdack
Miconia furfuracea	(Vahl) Griseb.		Miconia furfuracea (Vahl) Griseb.
Miconia galactantha	Naudin		Miconia galactantha Naudin
Miconia galdamesiae	Kriebel & Almeda		Miconia galdamesiae Kriebel & Almeda
Miconia galeiformis	Jan. M. Burke & Michelang.		Miconia galeiformis Jan. M. Burke & Michelang.
Miconia galeottii	(Naudin) Michelang.		Miconia galeottii (Naudin) Michelang.
Miconia garcia-barrigae	(Wurdack) Almeda		Miconia garcia-barrigae (Wurdack) Almeda
Miconia gentryi	Wurdack		Miconia gentryi Wurdack
Miconia georgebuntingii	Michelang.		Miconia georgebuntingii Michelang.
Miconia gibba	Markgr.		Miconia gibba Markgr.
Miconia gigantea	Cogn.		Miconia gigantea Cogn.
Miconia gigantophylla	(Britton) Michelang.		Miconia gigantophylla (Britton) Michelang.
Miconia gilva	Cogn.		Miconia gilva Cogn.
Miconia glaberrima	(Schltdl.) Naudin		Miconia glaberrima (Schltdl.) Naudin
Miconia glabrata	Cogn.		Miconia glabrata Cogn.
Miconia glabrifolia	Judd, Bécquer & Majure		Miconia glabrifolia Judd, Bécquer & Majure
Miconia glandulifera	Cogn.		Miconia glandulifera Cogn.
Miconia glanduliflora	R. Goldenb. & Michelang.		Miconia glanduliflora R. Goldenb. & Michelang.
Miconia glandulipetala	Ocampo & Almeda		Miconia glandulipetala Ocampo & Almeda
Miconia glandulistyla	Wurdack		Miconia glandulistyla Wurdack
Miconia glandulosa	(Sw.) Naudin		Miconia glandulosa (Sw.) Naudin
Miconia glaucescens	Triana		Miconia glaucescens Triana
Miconia glazioviana	Cogn.		Miconia glazioviana Cogn.
Miconia gleasoniana	Wurdack		Miconia gleasoniana Wurdack
Miconia globulifera	Naudin		Miconia globulifera Naudin
Miconia globuliflora	(Rich.) Cogn.		Miconia globuliflora (Rich.) Cogn.
Miconia glomerata	Triana		Miconia glomerata Triana
Miconia glomerulifera	Cogn.		Miconia glomerulifera Cogn.
Miconia glomeruliflora	Judd, Bécquer & Majure		Miconia glomeruliflora Judd, Bécquer & Majure
Miconia gloriosa	(Macfad.) Michelang.		Miconia gloriosa (Macfad.) Michelang.
Miconia glutinosa	Cogn.		Miconia glutinosa Cogn.
Miconia glyptophylla	Wurdack		Miconia glyptophylla Wurdack
Miconia goldenbergiana	Caddah		Miconia goldenbergiana Caddah
Miconia gonioclada	Triana		Miconia gonioclada Triana
Miconia goniostigma	Triana		Miconia goniostigma Triana
Miconia gonoptera	(Gleason) Michelang.		Miconia gonoptera (Gleason) Michelang.
Miconia gorzulae	(Wurdack) Michelang. & R. Goldenb.		Miconia gorzulae (Wurdack) Michelang. & R. Goldenb.
Miconia gossypina	Triana		Miconia gossypina Triana
Miconia goudotii	Naudin		Miconia goudotii Naudin
Miconia graciliflora	(Huber) Michelang.		Miconia graciliflora (Huber) Michelang.
Miconia gracilifolia	Ionta & Judd		Miconia gracilifolia Ionta & Judd
Miconia gracilipes	(Gleason) Michelang.		Miconia gracilipes (Gleason) Michelang.
Miconia gracilis	Triana		Miconia gracilis Triana
Miconia granatensis	(Gleason) Ocampo & Almeda		Miconia granatensis (Gleason) Ocampo & Almeda
Miconia grandibracteata	Judd, Bécquer & Majure		Miconia grandibracteata Judd, Bécquer & Majure
Miconia grandidentata	Almeda		Miconia grandidentata Almeda
Miconia grandiflora	Cogn.		Miconia grandiflora Cogn.
Miconia grandifoliata	R. Goldenb. & Michelang.		Miconia grandifoliata R. Goldenb. & Michelang.
Miconia granulata	(Urb.) Majure & Judd		Miconia granulata (Urb.) Majure & Judd
Miconia granvillei	(Wurdack) Michelang.		Miconia granvillei (Wurdack) Michelang.
Miconia gratissima	Benth. ex Triana		Miconia gratissima Benth. ex Triana
Miconia grayana	Cogn.		Miconia grayana Cogn.
Miconia grayumii	Almeda		Miconia grayumii Almeda
Miconia grenadensis	(Penneys & Judd) Penneys		Miconia grenadensis (Penneys & Judd) Penneys
Miconia griffisii	J.F. Macbr.		Miconia griffisii J.F. Macbr.
Miconia grisea	Cogn.		Miconia grisea Cogn.
Miconia grisebachiana	Bécquer & Michelang.		Miconia grisebachiana Bécquer & Michelang.
Miconia grossidentata	Wurdack		Miconia grossidentata Wurdack
Miconia guadalupensis	(DC.) Judd, Ionta, & Majure		Miconia guadalupensis (DC.) Judd, Ionta, & Majure
Miconia guaiquinimae	Wurdack		Miconia guaiquinimae Wurdack
Miconia guajaibonensis	Judd, Bécquer & Majure		Miconia guajaibonensis Judd, Bécquer & Majure
Miconia guatemalensis	Cogn.		Miconia guatemalensis Cogn.
Miconia guayaquilensis	(Bonpl.) D. Don ex DC.		Miconia guayaquilensis (Bonpl.) D. Don ex DC.
Miconia gynoverrucosa	(Reginato) R. Goldenb.		Miconia gynoverrucosa (Reginato) R. Goldenb.
Miconia hadrophylla	Wurdack		Miconia hadrophylla Wurdack
Miconia haemantha	(Triana ex Cogn.) Skean, Judd & Majure		Miconia haemantha (Triana ex Cogn.) Skean, Judd & Majure
Miconia haemanthoides	Skean, Judd & Majure		Miconia haemanthoides Skean, Judd & Majure
Miconia hamata	Cogn.		Miconia hamata Cogn.
Miconia hammelii	(Almeda) Almeda		Miconia hammelii (Almeda) Almeda
Miconia hanstuerckheimii	Michelang.		Miconia hanstuerckheimii Michelang.
Miconia harlingii	Wurdack		Miconia harlingii Wurdack
Miconia hatschbachii	(Brade) R. Goldenb.		Miconia hatschbachii (Brade) R. Goldenb.
Miconia haughtii	(Gleason) Wurdack		Miconia haughtii (Gleason) Wurdack
Miconia heliotropoides	Triana		Miconia heliotropoides Triana
Miconia hematostemon	Naudin		Miconia hematostemon Naudin
Miconia hemenostigma	Naudin		Miconia hemenostigma Naudin
Miconia henripittieri	(Kriebel) Michelang.		Miconia henripittieri (Kriebel) Michelang.
Miconia heptamera	(Wurdack) Michelang.		Miconia heptamera (Wurdack) Michelang.
Miconia herincquiana	(Cogn.) R. Goldenb.		Miconia herincquiana (Cogn.) R. Goldenb.
Miconia hermogenesii	(Baumgratz & D'El Rei Souza) R. Goldenb.		Miconia hermogenesii (Baumgratz & D'El Rei Souza) R. Goldenb.
Miconia hernandogarciae	H. Mend. & Idárraga		Miconia hernandogarciae H. Mend. & Idárraga
Miconia herpetica	DC.		Miconia herpetica DC.
Miconia herrerae	Gleason		Miconia herrerae Gleason
Miconia herzogii	Cogn.		Miconia herzogii Cogn.
Miconia heterochaeta	Wurdack		Miconia heterochaeta Wurdack
Miconia heteroclita	(Naudin) Michelang.		Miconia heteroclita (Naudin) Michelang.
Miconia heteromera	Naudin		Miconia heteromera Naudin
Miconia heteronervis	(Naudin) Michelang.		Miconia heteronervis (Naudin) Michelang.
Miconia heteroneura	(Schrank & Mart. ex DC.) Michelang.		Miconia heteroneura (Schrank & Mart. ex DC.) Michelang.
Miconia heterophylla	(Naudin) M. Gómez		Miconia heterophylla (Naudin) M. Gómez
Miconia heteroporata	(Reginato) R. Goldenb.		Miconia heteroporata (Reginato) R. Goldenb.
Miconia heterothrix	Gleason & Wurdack		Miconia heterothrix Gleason & Wurdack
Miconia heterotricha	Wurdack		Miconia heterotricha Wurdack
Miconia hexamera	Wurdack		Miconia hexamera Wurdack
Miconia hexapetala	Wurdack		Miconia hexapetala Wurdack
Miconia hildeana	Kriebel & Almeda		Miconia hildeana Kriebel & Almeda
Miconia hirsuta	(Sw.) Judd, Bécquer & Majure		Miconia hirsuta (Sw.) Judd, Bécquer & Majure
Miconia hirsutivena	Gleason		Miconia hirsutivena Gleason
Miconia hirta	Cogn.		Miconia hirta Cogn.
Miconia hirtella	Cogn.		Miconia hirtella Cogn.
Miconia hirtellicaulis	Ionta & Judd		Miconia hirtellicaulis Ionta & Judd
Miconia hirticalyx	Judd & Bécquer		Miconia hirticalyx Judd & Bécquer
Miconia hirticaulis	Skean, Judd & Majure		Miconia hirticaulis Skean, Judd & Majure
Miconia hirtistyla	Bécquer & Majure		Miconia hirtistyla Bécquer & Majure
Miconia hispaniolica	Judd & Majure		Miconia hispaniolica Judd & Majure
Miconia hispidula	(Cogn.) Judd, Bécquer & Majure		Miconia hispidula (Cogn.) Judd, Bécquer & Majure
Miconia histothrix	Wurdack		Miconia histothrix Wurdack
Miconia holosericea	(L.) DC.		Miconia holosericea (L.) DC.
Miconia hondurensis	Donn. Sm.		Miconia hondurensis Donn. Sm.
Miconia hookeriana	Triana		Miconia hookeriana Triana
Miconia horrida	(Cogn.) R. Goldenb.		Miconia horrida (Cogn.) R. Goldenb.
Miconia hospitalis	Wurdack		Miconia hospitalis Wurdack
Miconia hotteana	(Urb. & Ekman) Judd & Ionta		Miconia hotteana (Urb. & Ekman) Judd & Ionta
Miconia hotteana	(Urb. & Ekman) Judd & Ionta		Miconia hotteana (Urb. & Ekman) Judd & Ionta
Miconia hottensis	Ionta, Judd & Skean		Miconia hottensis Ionta, Judd & Skean
Miconia howardiana	Judd, Salzman & Skean		Miconia howardiana Judd, Salzman & Skean
Miconia huanucensis	Wurdack		Miconia huanucensis Wurdack
Miconia huberi	Wurdack		Miconia huberi Wurdack
Miconia huigrensis	Wurdack		Miconia huigrensis Wurdack
Miconia humifusa	Jan. M. Burke & Michelang.		Miconia humifusa Jan. M. Burke & Michelang.
Miconia hutchisonii	Wurdack		Miconia hutchisonii Wurdack
Miconia hybophylla	(Urb.) Majure & Judd		Miconia hybophylla (Urb.) Majure & Judd
Miconia hyemalis	A. St.-Hil. & Naudin		Miconia hyemalis A. St.-Hil. & Naudin
Miconia hygrophila	Naudin		Miconia hygrophila Naudin
Miconia hylophila	Wurdack		Miconia hylophila Wurdack
Miconia hymenanthera	Triana		Miconia hymenanthera Triana
Miconia hyperprasina	Naudin		Miconia hyperprasina Naudin
Miconia hypiodes	Urb. & Ekman		Miconia hypiodes Urb. & Ekman
Miconia hypoglauca	(C. Wright ex Griseb.) Judd, Bécquer & Majure		Miconia hypoglauca (C. Wright ex Griseb.) Judd, Bécquer & Majure
Miconia hypoleuca	(Benth.) Triana		Miconia hypoleuca (Benth.) Triana
Miconia ibaguensis	(Bonpl.) Triana		Miconia ibaguensis (Bonpl.) Triana
Miconia ibarrae	Almeda		Miconia ibarrae Almeda
Miconia icosandra	Gleason		Miconia icosandra Gleason
Miconia idiogena	Wurdack		Miconia idiogena Wurdack
Miconia idroboi	Wurdack		Miconia idroboi Wurdack
Miconia iluensis	Wurdack		Miconia iluensis Wurdack
Miconia imbricata	Gleason		Miconia imbricata Gleason
Miconia imitans	Wurdack		Miconia imitans Wurdack
Miconia imparilis	(Wurdack) Michelang.		Miconia imparilis (Wurdack) Michelang.
Miconia impetiolaris	(Sw.) D. Don ex DC.		Miconia impetiolaris (Sw.) D. Don ex DC.
Miconia impressa	(Urb.) Judd, Bécquer & Majure		Miconia impressa (Urb.) Judd, Bécquer & Majure
Miconia impressinervis	Skean & Judd		Miconia impressinervis Skean & Judd
Miconia inaequalifolia	Triana		Miconia inaequalifolia Triana
Miconia inaequalis	R. Goldenb. & Michelang.		Miconia inaequalis R. Goldenb. & Michelang.
Miconia inaequidens	(DC.) Naudin		Miconia inaequidens (DC.) Naudin
Miconia inaequipetiolata	Majure & Judd		Miconia inaequipetiolata Majure & Judd
Miconia inamoena	Pilg.		Miconia inamoena Pilg.
Miconia inanis	Cogn. & Gleason ex Gleason		Miconia inanis Cogn. & Gleason ex Gleason
Miconia incachacana	Wurdack		Miconia incachacana Wurdack
Miconia incerta	(Wurdack) Gamba & Almeda		Miconia incerta (Wurdack) Gamba & Almeda
Miconia inconspicua	Miq.		Miconia inconspicua Miq.
Miconia incurva	Gleason		Miconia incurva Gleason
Miconia indicoviolacea	Gamba, Almeda & Alvear		Miconia indicoviolacea Gamba, Almeda & Alvear
Miconia ingens	Wurdack		Miconia ingens Wurdack
Miconia innata	Gleason		Miconia innata Gleason
Miconia inobsepta	(Wurdack) Michelang.		Miconia inobsepta (Wurdack) Michelang.
Miconia inopinata	(Almeda) Almeda		Miconia inopinata (Almeda) Almeda
Miconia insueta	Wurdack		Miconia insueta Wurdack
Miconia insularis	Gleason		Miconia insularis Gleason
Miconia integrifolia	Cogn.		Miconia integrifolia Cogn.
Miconia intermedia	(DC.) Ocampo & Almeda		Miconia intermedia (DC.) Ocampo & Almeda
Miconia intonsa	(E. Cotton & W. Meier) Michelang.		Miconia intonsa (E. Cotton & W. Meier) Michelang.
Miconia intricata	Triana		Miconia intricata Triana
Miconia inusitata	(Wurdack) Michelang. & R. Goldenb.		Miconia inusitata (Wurdack) Michelang. & R. Goldenb.
Miconia ioneura	Griseb.		Miconia ioneura Griseb.
Miconia ionopogon	(Mart.) R. Goldenb.		Miconia ionopogon (Mart.) R. Goldenb.
Miconia irwinii	Wurdack		Miconia irwinii Wurdack
Miconia itatiaiae	(Wawra) R. Goldenb.		Miconia itatiaiae (Wawra) R. Goldenb.
Miconia iteophylla	Almeda		Miconia iteophylla Almeda
Miconia jahnii	Pittier		Miconia jahnii Pittier
Miconia jaliscana	(Standl.) Michelang.		Miconia jaliscana (Standl.) Michelang.
Miconia jamesluteynii	Michelang.		Miconia jamesluteynii Michelang.
Miconia jashaferi	Majure & Judd		Miconia jashaferi Majure & Judd
Miconia javorkaeana	Borhidi		Miconia javorkaeana Borhidi
Miconia jefensis	Almeda		Miconia jefensis Almeda
Miconia jentaculorum	Wurdack		Miconia jentaculorum Wurdack
Miconia jimenezii	Judd & R.S. Beaman		Miconia jimenezii Judd & R.S. Beaman
Miconia jitotolana	Wurdack		Miconia jitotolana Wurdack
Miconia jorgensenii	Wurdack		Miconia jorgensenii Wurdack
Miconia josecuatrecasasii	R. Goldenb. & Michelang.		Miconia josecuatrecasasii R. Goldenb. & Michelang.
Miconia jucunda	(DC.) Triana		Miconia jucunda (DC.) Triana
Miconia juddii	(Skean) Skean, Judd & Majure		Miconia juddii (Skean) Skean, Judd & Majure
Miconia julianii	Michelang.		Miconia julianii Michelang.
Miconia juliansteyermarkii	R. Goldenb. & Michelang.		Miconia juliansteyermarkii R. Goldenb. & Michelang.
Miconia juruensis	Pilg.		Miconia juruensis Pilg.
Miconia kappellei	Almeda & Kriebel		Miconia kappellei Almeda & Kriebel
Miconia kappleri	Naudin		Miconia kappleri Naudin
Miconia karlkrugii	Majure & Judd		Miconia karlkrugii Majure & Judd
Miconia karsticola	Judd, Bécquer, Skean & Majure		Miconia karsticola Judd, Bécquer, Skean & Majure
Miconia kavanayensis	Wurdack		Miconia kavanayensis Wurdack
Miconia klotzschii	Triana		Miconia klotzschii Triana
Miconia klugii	Gleason		Miconia klugii Gleason
Miconia koepckeana	Wurdack		Miconia koepckeana Wurdack
Miconia kollmannii	R. Goldenb. & Reginato		Miconia kollmannii R. Goldenb. & Reginato
Miconia kraenzlinii	Cogn.		Miconia kraenzlinii Cogn.
Miconia kriegeriana	Baumgratz & Chiaveg.		Miconia kriegeriana Baumgratz & Chiaveg.
Miconia krugiana	(Cogn.) Majure & Judd		Miconia krugiana (Cogn.) Majure & Judd
Miconia krugii	Cogn.		Miconia krugii Cogn.
Miconia kuntzei	Cogn.		Miconia kuntzei Cogn.
Miconia labiakiana	Goldenb. & C.V. Martin		Miconia labiakiana Goldenb. & C.V. Martin
Miconia lacera	(Bonpl.) Naudin		Miconia lacera (Bonpl.) Naudin
Miconia lachnoclada	Wurdack		Miconia lachnoclada Wurdack
Miconia laciniata	Wurdack		Miconia laciniata Wurdack
Miconia lacunosa	(Cogn.) R. Goldenb.		Miconia lacunosa (Cogn.) R. Goldenb.
Miconia laeta	Cogn.		Miconia laeta Cogn.
Miconia laetivirens	L. Uribe		Miconia laetivirens L. Uribe
Miconia laevifolia	(Gleason) Michelang.		Miconia laevifolia (Gleason) Michelang.
Miconia laevigata	(L.) D. Don		Miconia laevigata (L.) D. Don
Miconia laevipilis	Wurdack		Miconia laevipilis Wurdack
Miconia lagunensis	Ule		Miconia lagunensis Ule
Miconia lambayequensis	Wurdack		Miconia lambayequensis Wurdack
Miconia lamprarrhena	Triana		Miconia lamprarrhena Triana
Miconia lamprophylla	Triana		Miconia lamprophylla Triana
Miconia lanata	(DC.) Triana		Miconia lanata (DC.) Triana
Miconia lanatifolia	Judd, Bécquer & Majure		Miconia lanatifolia Judd, Bécquer & Majure
Miconia lanceifolia	(Urb.) Ionta, Judd & Skean		Miconia lanceifolia (Urb.) Ionta, Judd & Skean
Miconia lanceolata	(Desr.) DC.		Miconia lanceolata (Desr.) DC.
Miconia lancifolia	(Spruce ex Triana) Michelang.		Miconia lancifolia (Spruce ex Triana) Michelang.
Miconia lapae	(D'El Rei Souza & Baumgratz) R. Goldenb.		Miconia lapae (D'El Rei Souza & Baumgratz) R. Goldenb.
Miconia lappacea	(DC.) Triana		Miconia lappacea (DC.) Triana
Miconia larensis	Gleason		Miconia larensis Gleason
Miconia lasiocalyx	Cogn.		Miconia lasiocalyx Cogn.
Miconia lasiopetala	(Cogn.) Almeda		Miconia lasiopetala (Cogn.) Almeda
Miconia lasiopoda	(Benth.) Michelang.		Miconia lasiopoda (Benth.) Michelang.
Miconia lasiostachya	(Cogn.) R. Goldenb.		Miconia lasiostachya (Cogn.) R. Goldenb.
Miconia lasiostyla	Gleason		Miconia lasiostyla Gleason
Miconia lasseri	Gleason		Miconia lasseri Gleason
Miconia latecrenata	(DC.) Naudin		Miconia latecrenata (DC.) Naudin
Miconia lateriflora	Cogn.		Miconia lateriflora Cogn.
Miconia latidecurrens	Gamba & Almeda		Miconia latidecurrens Gamba & Almeda
Miconia latifolia	(D. Don) Naudin		Miconia latifolia (D. Don) Naudin
Miconia latistigma	Cogn.		Miconia latistigma Cogn.
Miconia laurina	(D. Don) Naudin		Miconia laurina (D. Don) Naudin
Miconia laxa	Wurdack		Miconia laxa Wurdack
Miconia laxiflora	(Schltdl.) Michelang.		Miconia laxiflora (Schltdl.) Michelang.
Miconia laxivenula	(Wurdack) Gamba & Almeda		Miconia laxivenula (Wurdack) Gamba & Almeda
Miconia leabiscoriacea	R. Goldenb.		Miconia leabiscoriacea R. Goldenb.
Miconia leabiswarmingiana	R. Goldenb.		Miconia leabiswarmingiana R. Goldenb.
Miconia leablanchetiana	R. Goldenb.		Miconia leablanchetiana R. Goldenb.
Miconia leacalvescens	R. Goldenb.		Miconia leacalvescens R. Goldenb.
Miconia leacapitata	R. Goldenb.		Miconia leacapitata R. Goldenb.
Miconia leacinnamomifolia	R. Goldenb.		Miconia leacinnamomifolia R. Goldenb.
Miconia leacollina	R. Goldenb.		Miconia leacollina R. Goldenb.
Miconia leaconfusa	R. Goldenb.		Miconia leaconfusa R. Goldenb.
Miconia leacongestiflora	R. Goldenb.		Miconia leacongestiflora R. Goldenb.
Miconia leacordifolia	R. Goldenb.		Miconia leacordifolia R. Goldenb.
Miconia leacoriacea	R. Goldenb.		Miconia leacoriacea R. Goldenb.
Miconia leacrenata	R. Goldenb. & Michelang.		Miconia leacrenata R. Goldenb. & Michelang.
[truncated: 1,734 more rows]
